# Supplementary material
Source: MDPI journal article supplement (https://www.mdpi.com/2073-4344/14/5/307)
Supplement: s1 [file s1]

Archive with 33 entries (33 files):
- 1.jpg
- 10.jpg
- 11.jpg
- 2.jpg
- 3.jpg
- 4.jpg
- 5.jpg
- 6.jpg
- 7.jpg
- 8.jpg
- 9.jpg
- Graphical Abstract.jpeg
- s1.jpg
- s10.jpg
- s11.jpg
- s12.jpg
- s13.jpg
- s14.jpg
- s15.jpg
- s2.jpg
- s3.jpg
- s4.jpg
- s5-1.jpg
- s5-2.jpg
- s6-1.jpg
- s6-2.jpg
- s6-3.jpg
- s6-4.jpg
- s6-5.jpg
- s7.jpg
- s8.jpg
- s9.jpg
- Supplementary Materials-catalysts-2965706.pdf
