# Supplementary material
Source: MDPI journal article supplement (https://www.mdpi.com/2073-4344/14/5/307)

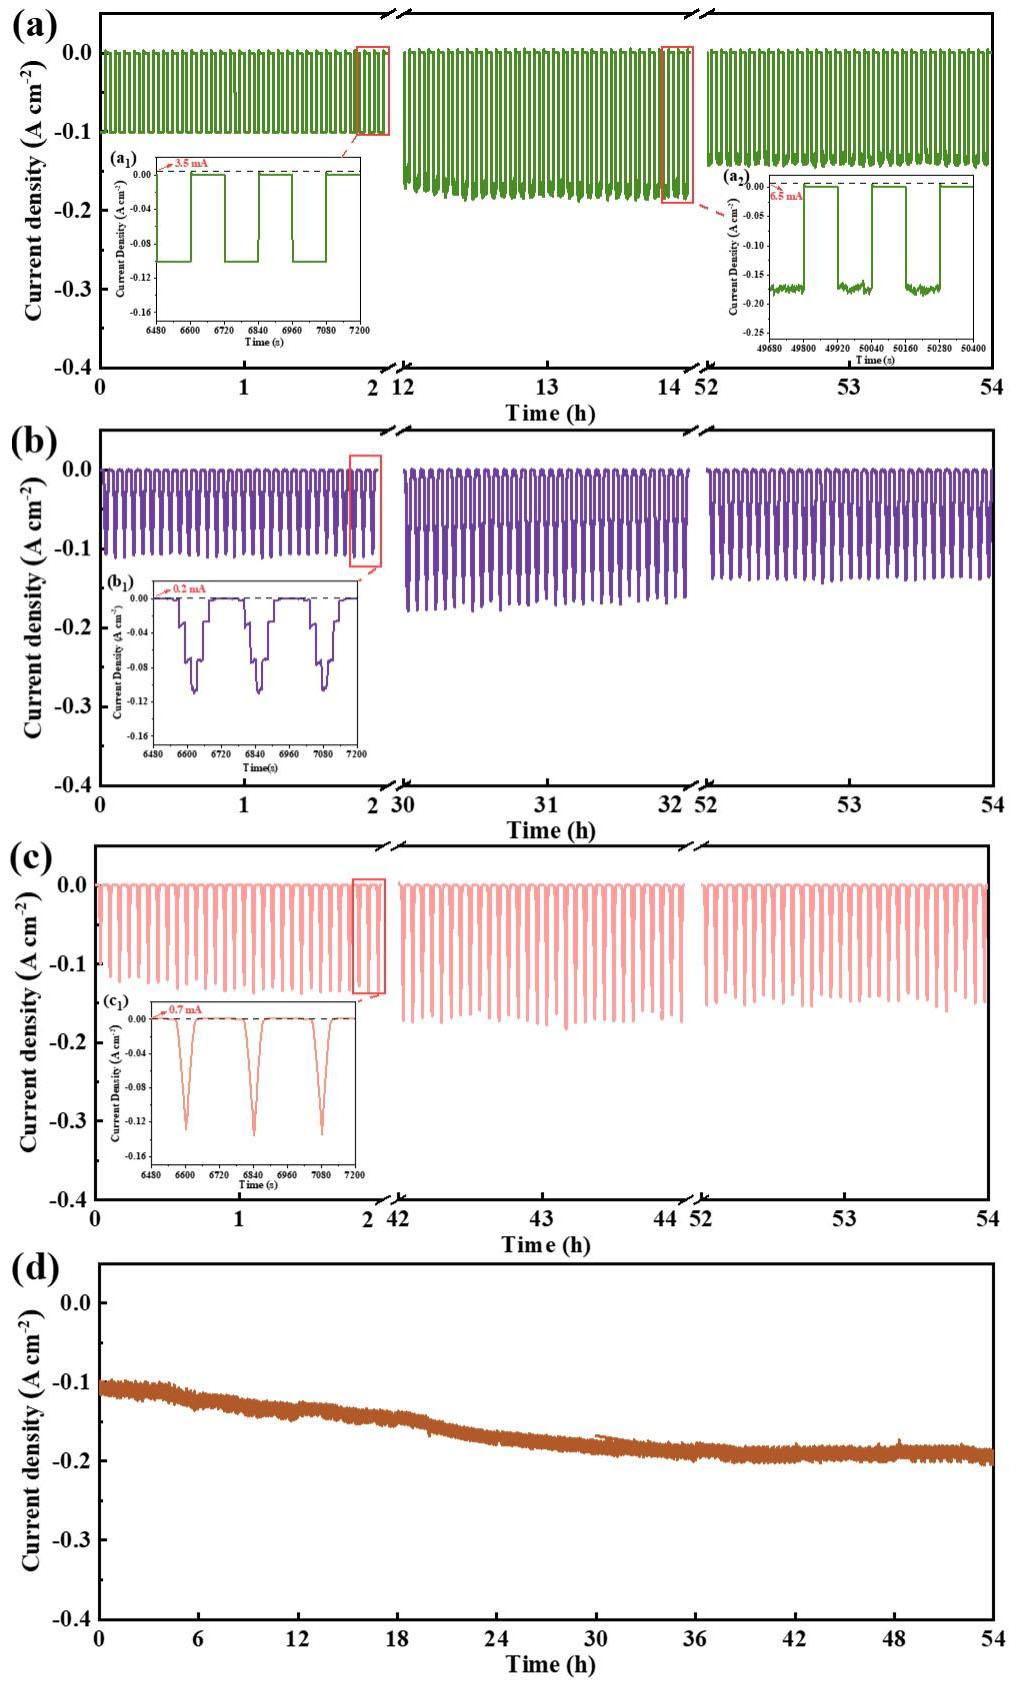

Supplement: s1 [file s1 › 1.jpg]

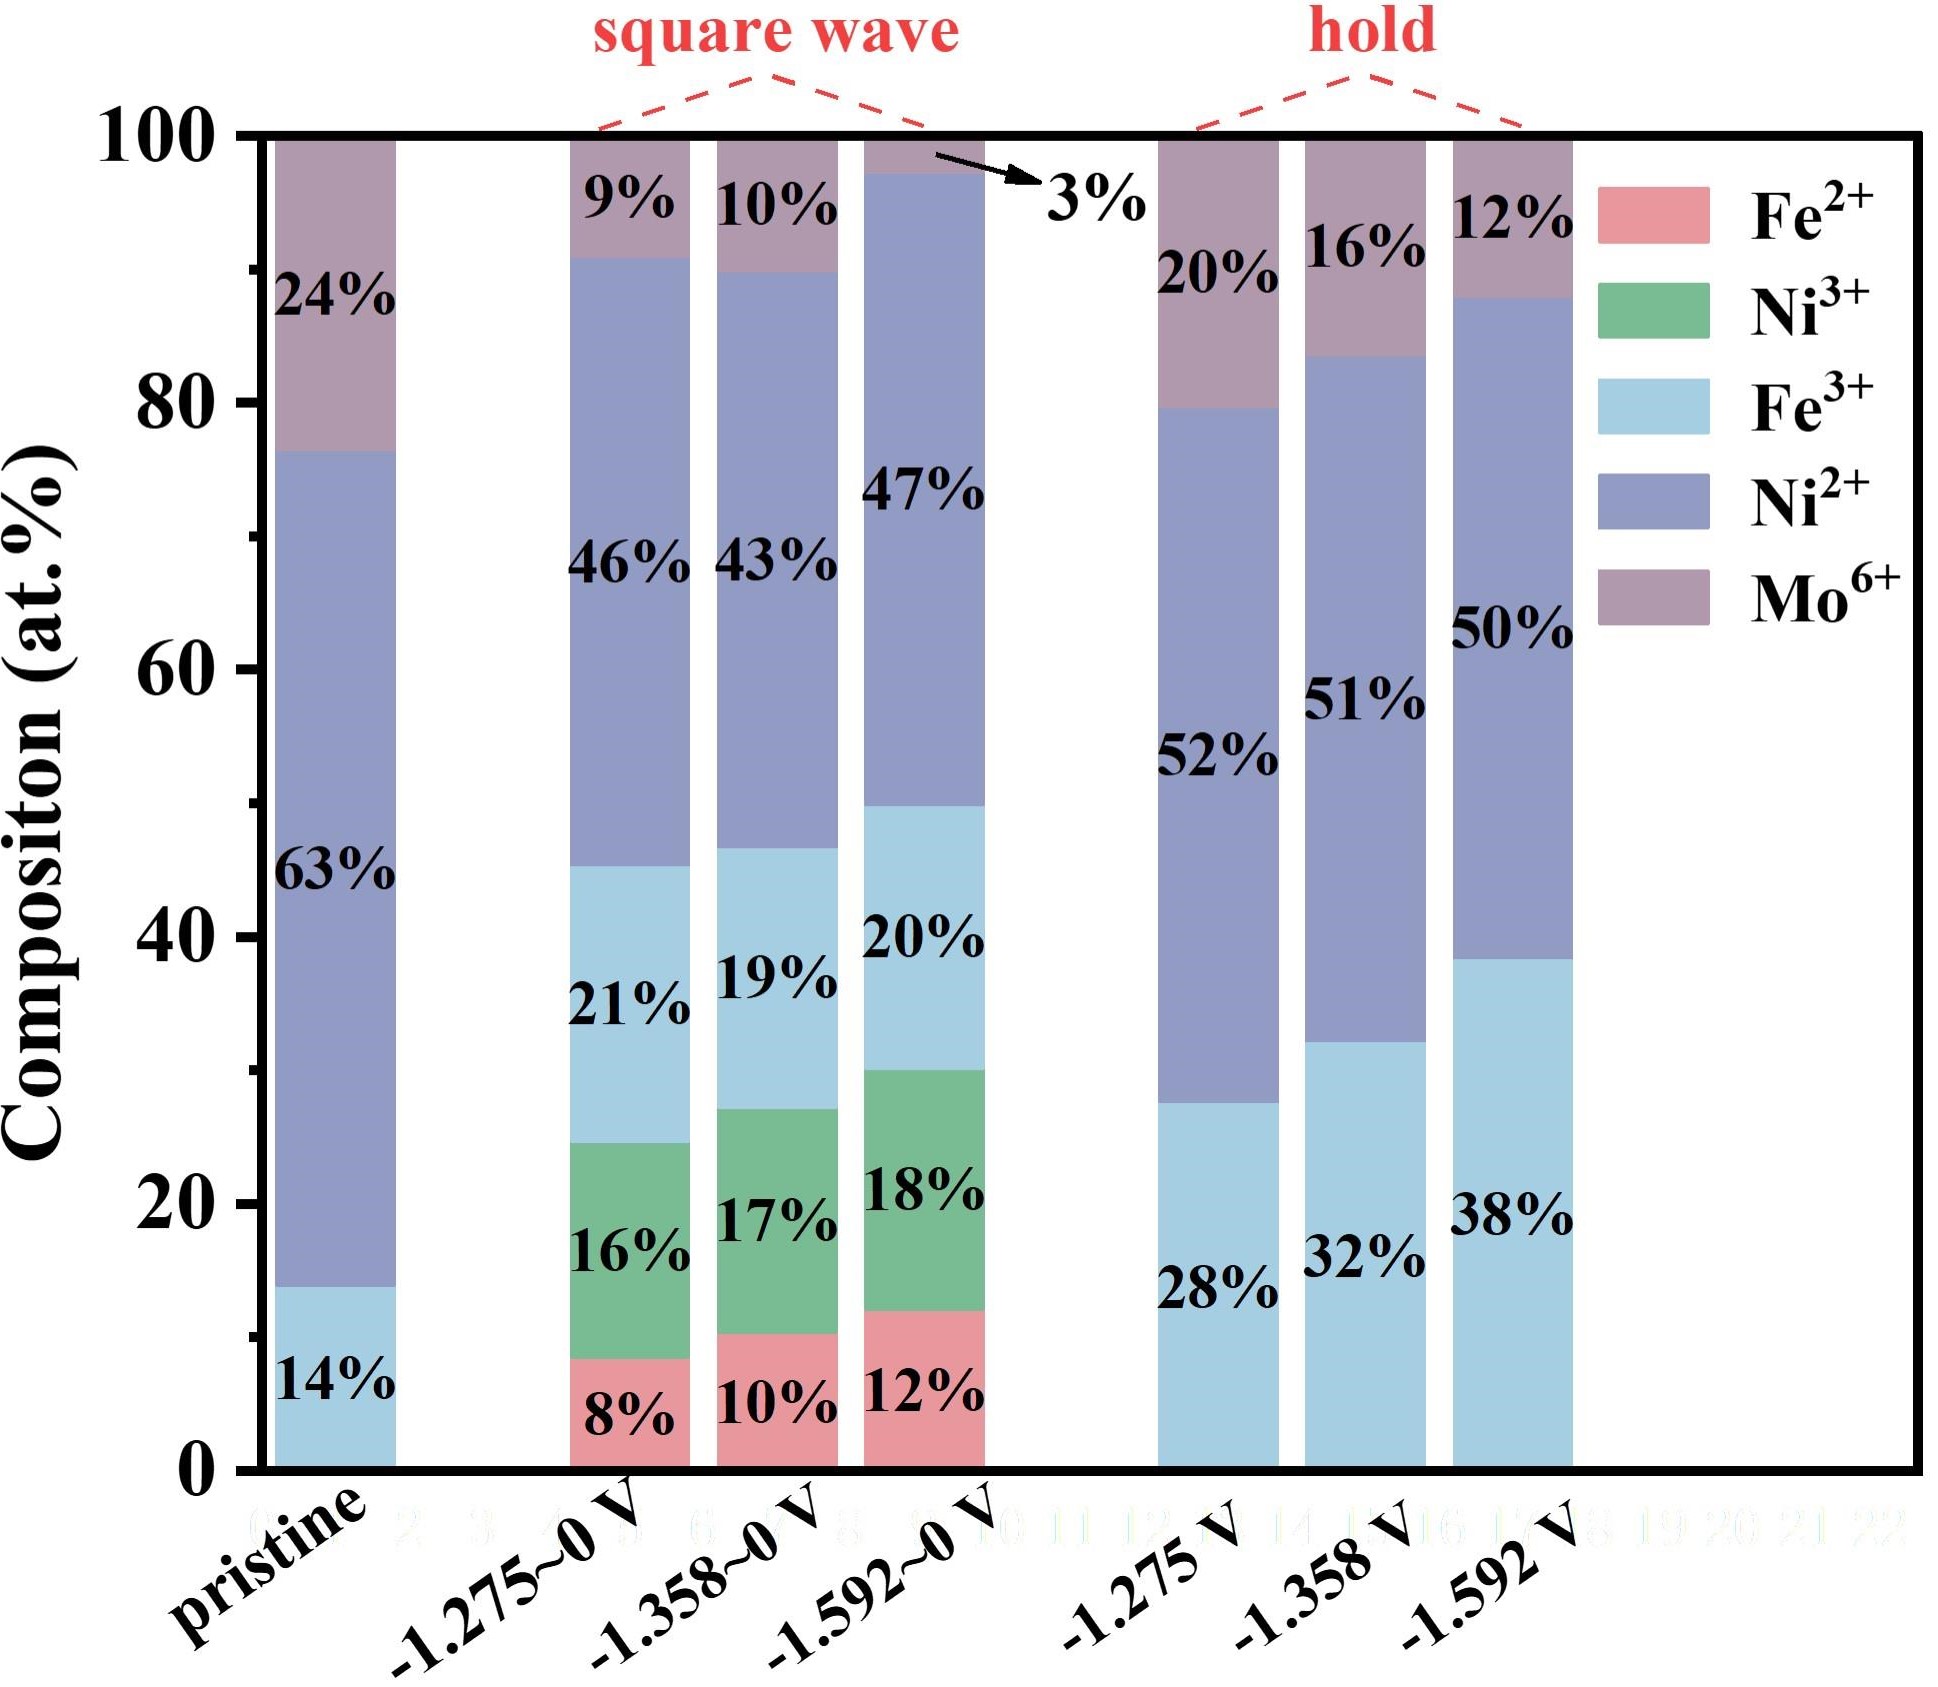

Supplement: s1 [file s1 › 10.jpg]

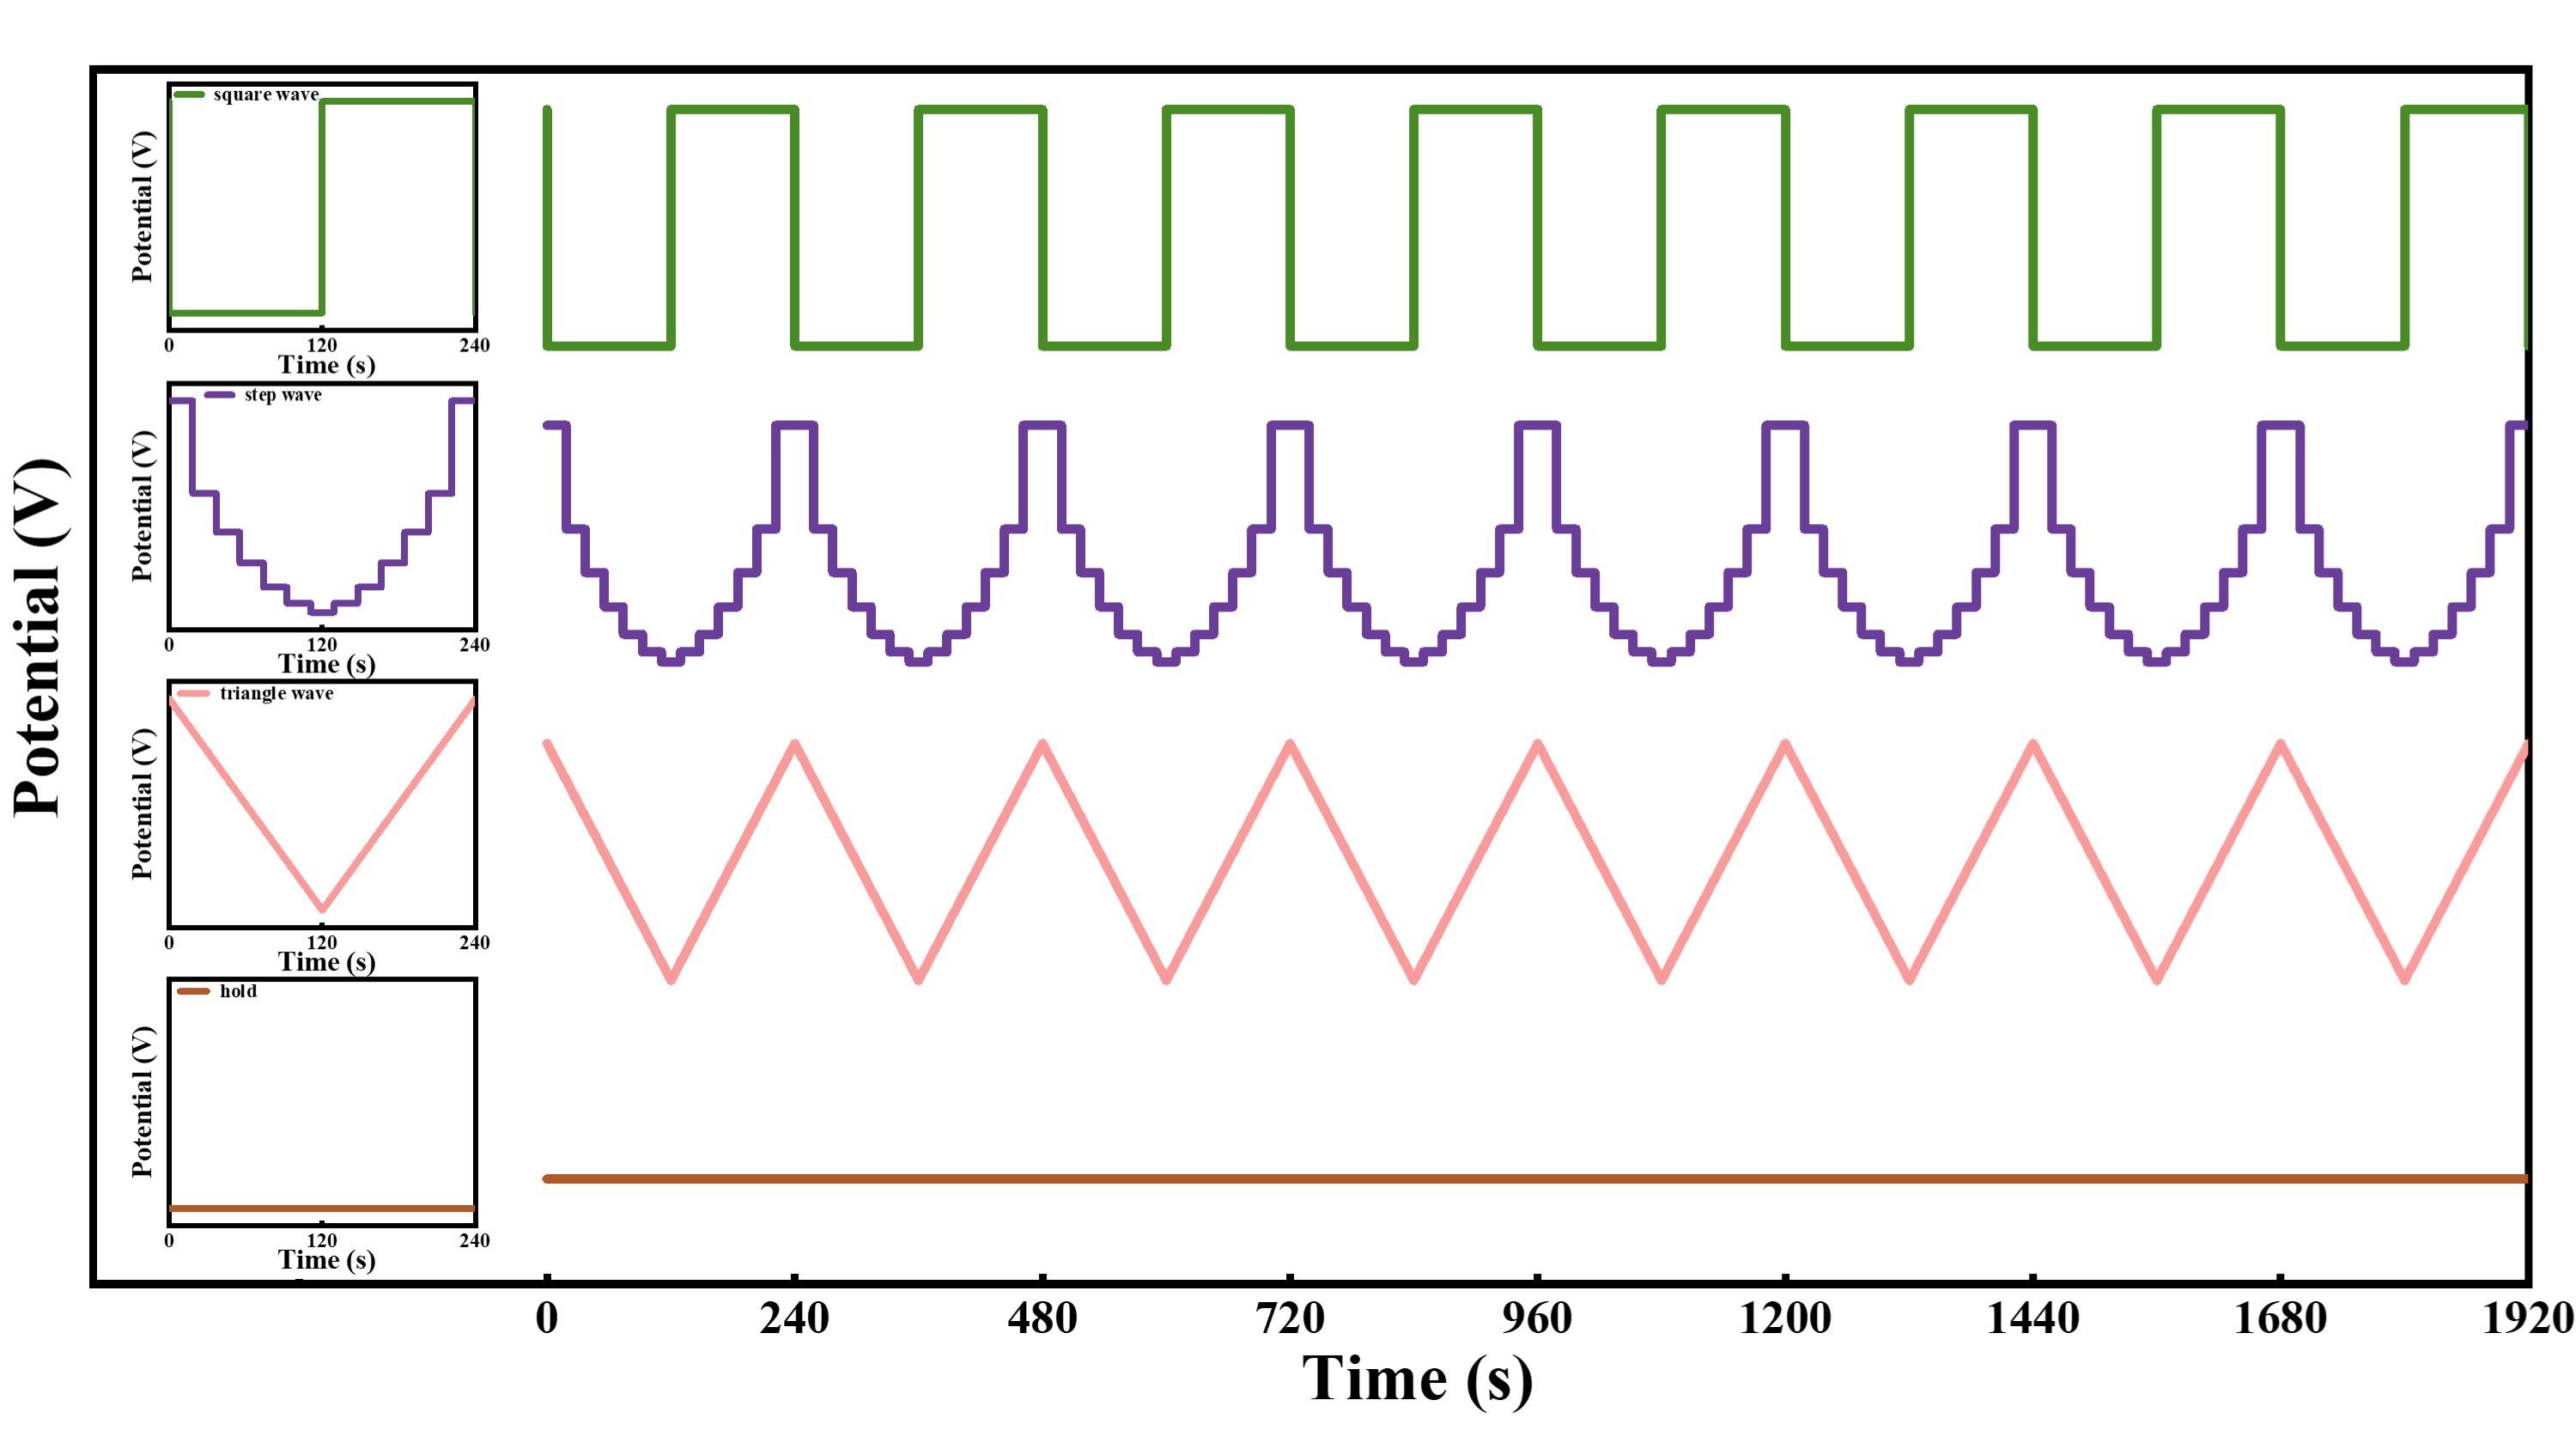

Supplement: s1 [file s1 › 11.jpg]

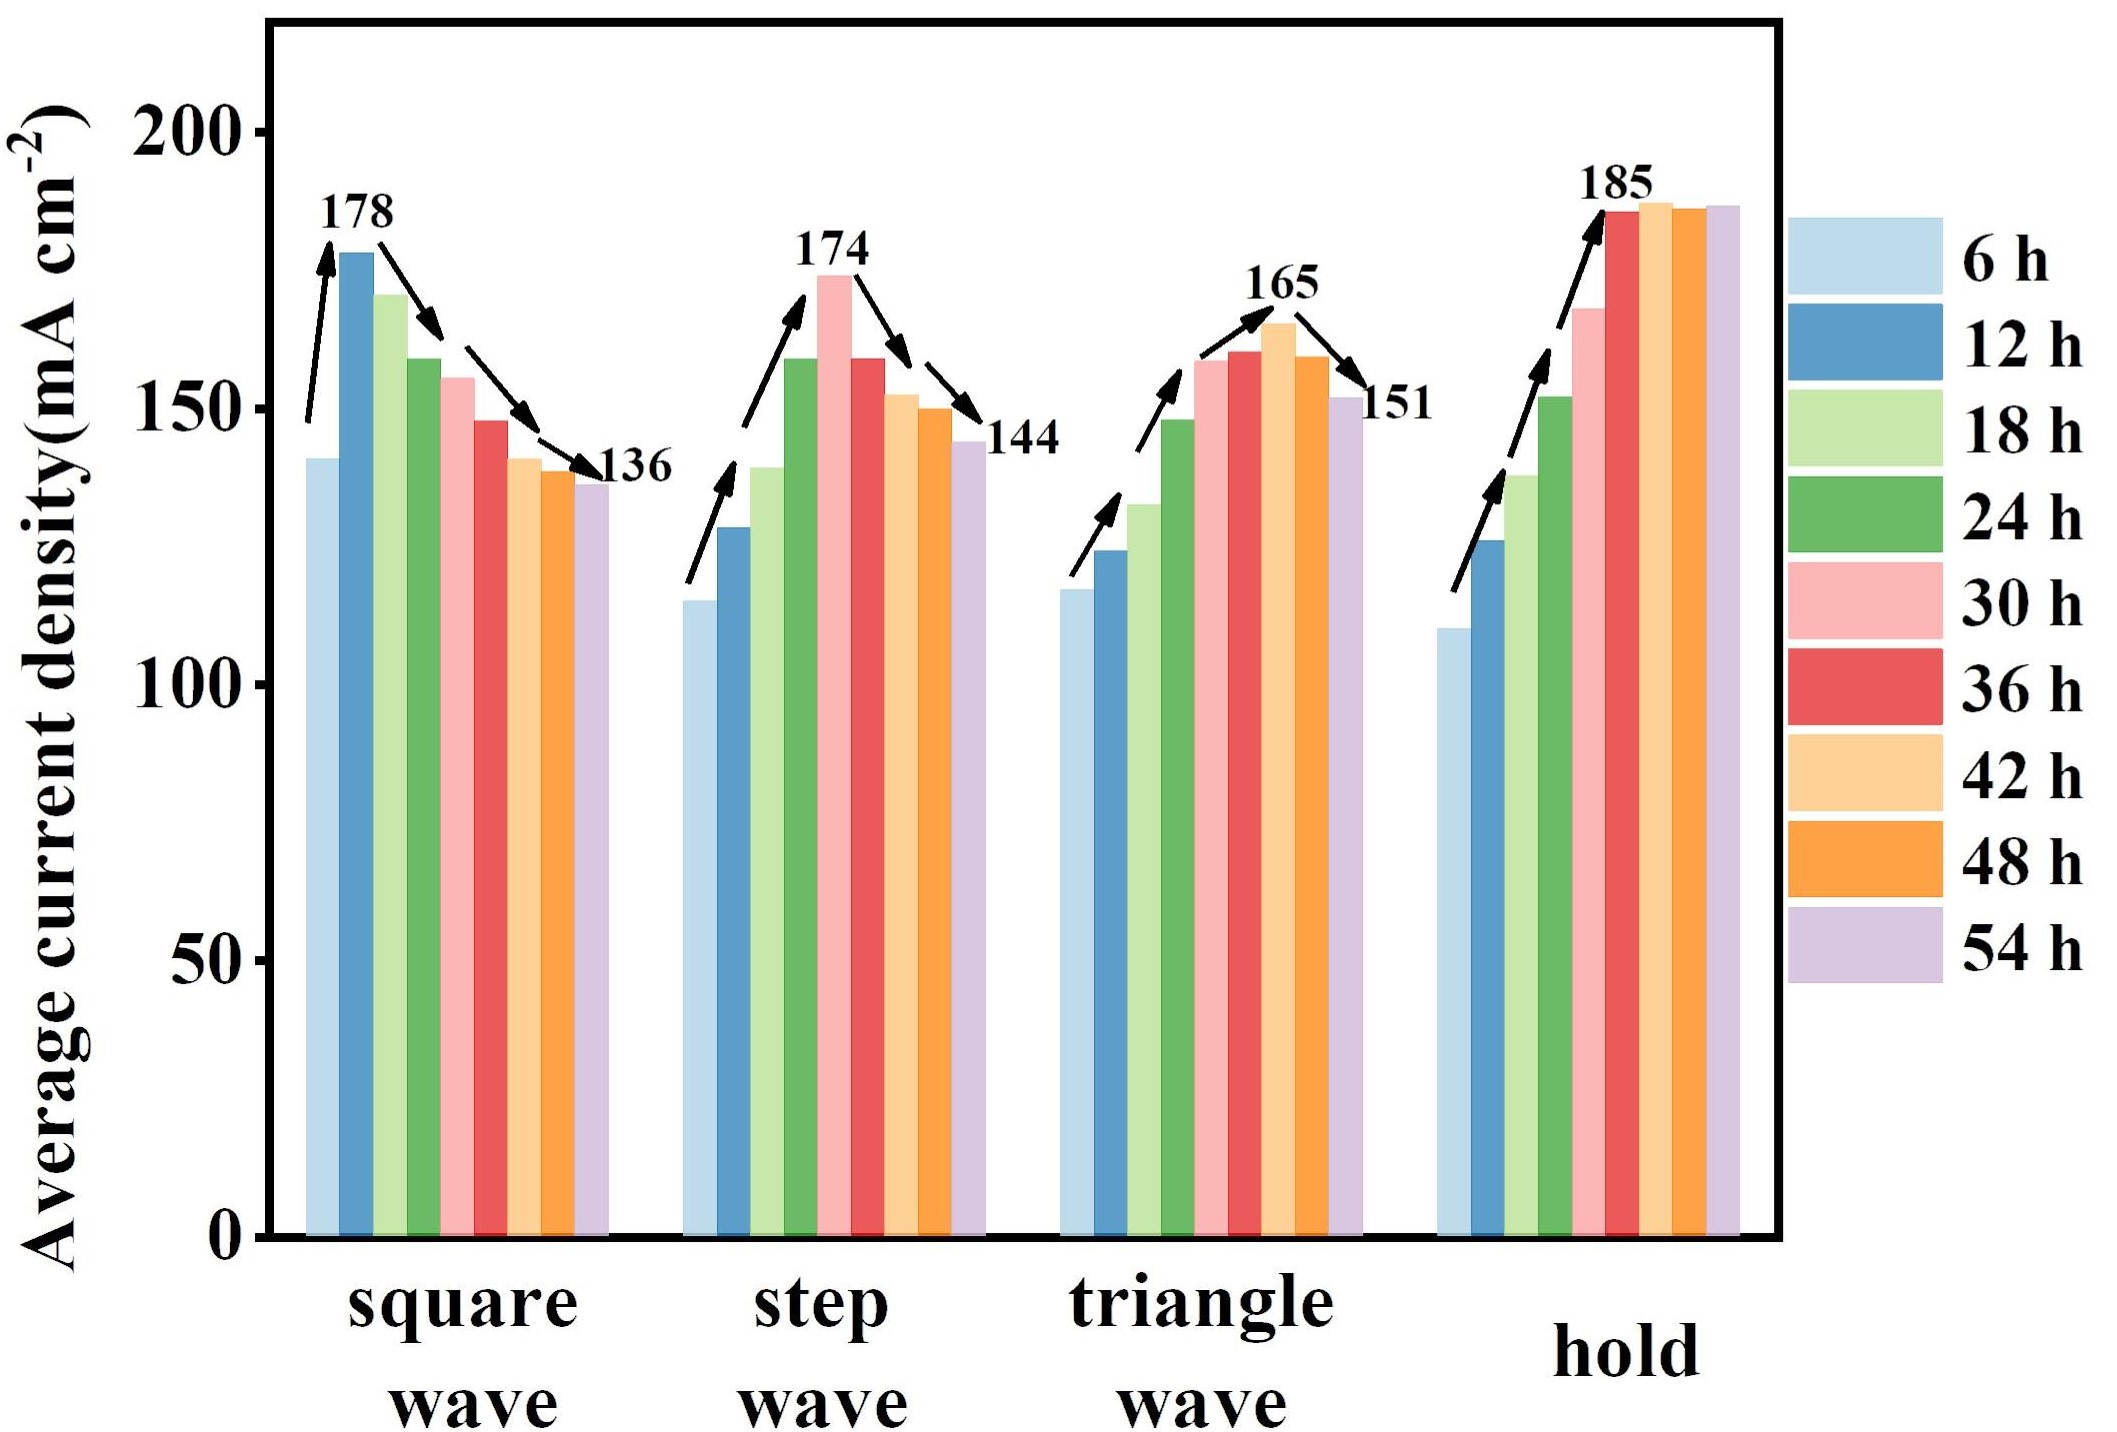

Supplement: s1 [file s1 › 2.jpg]

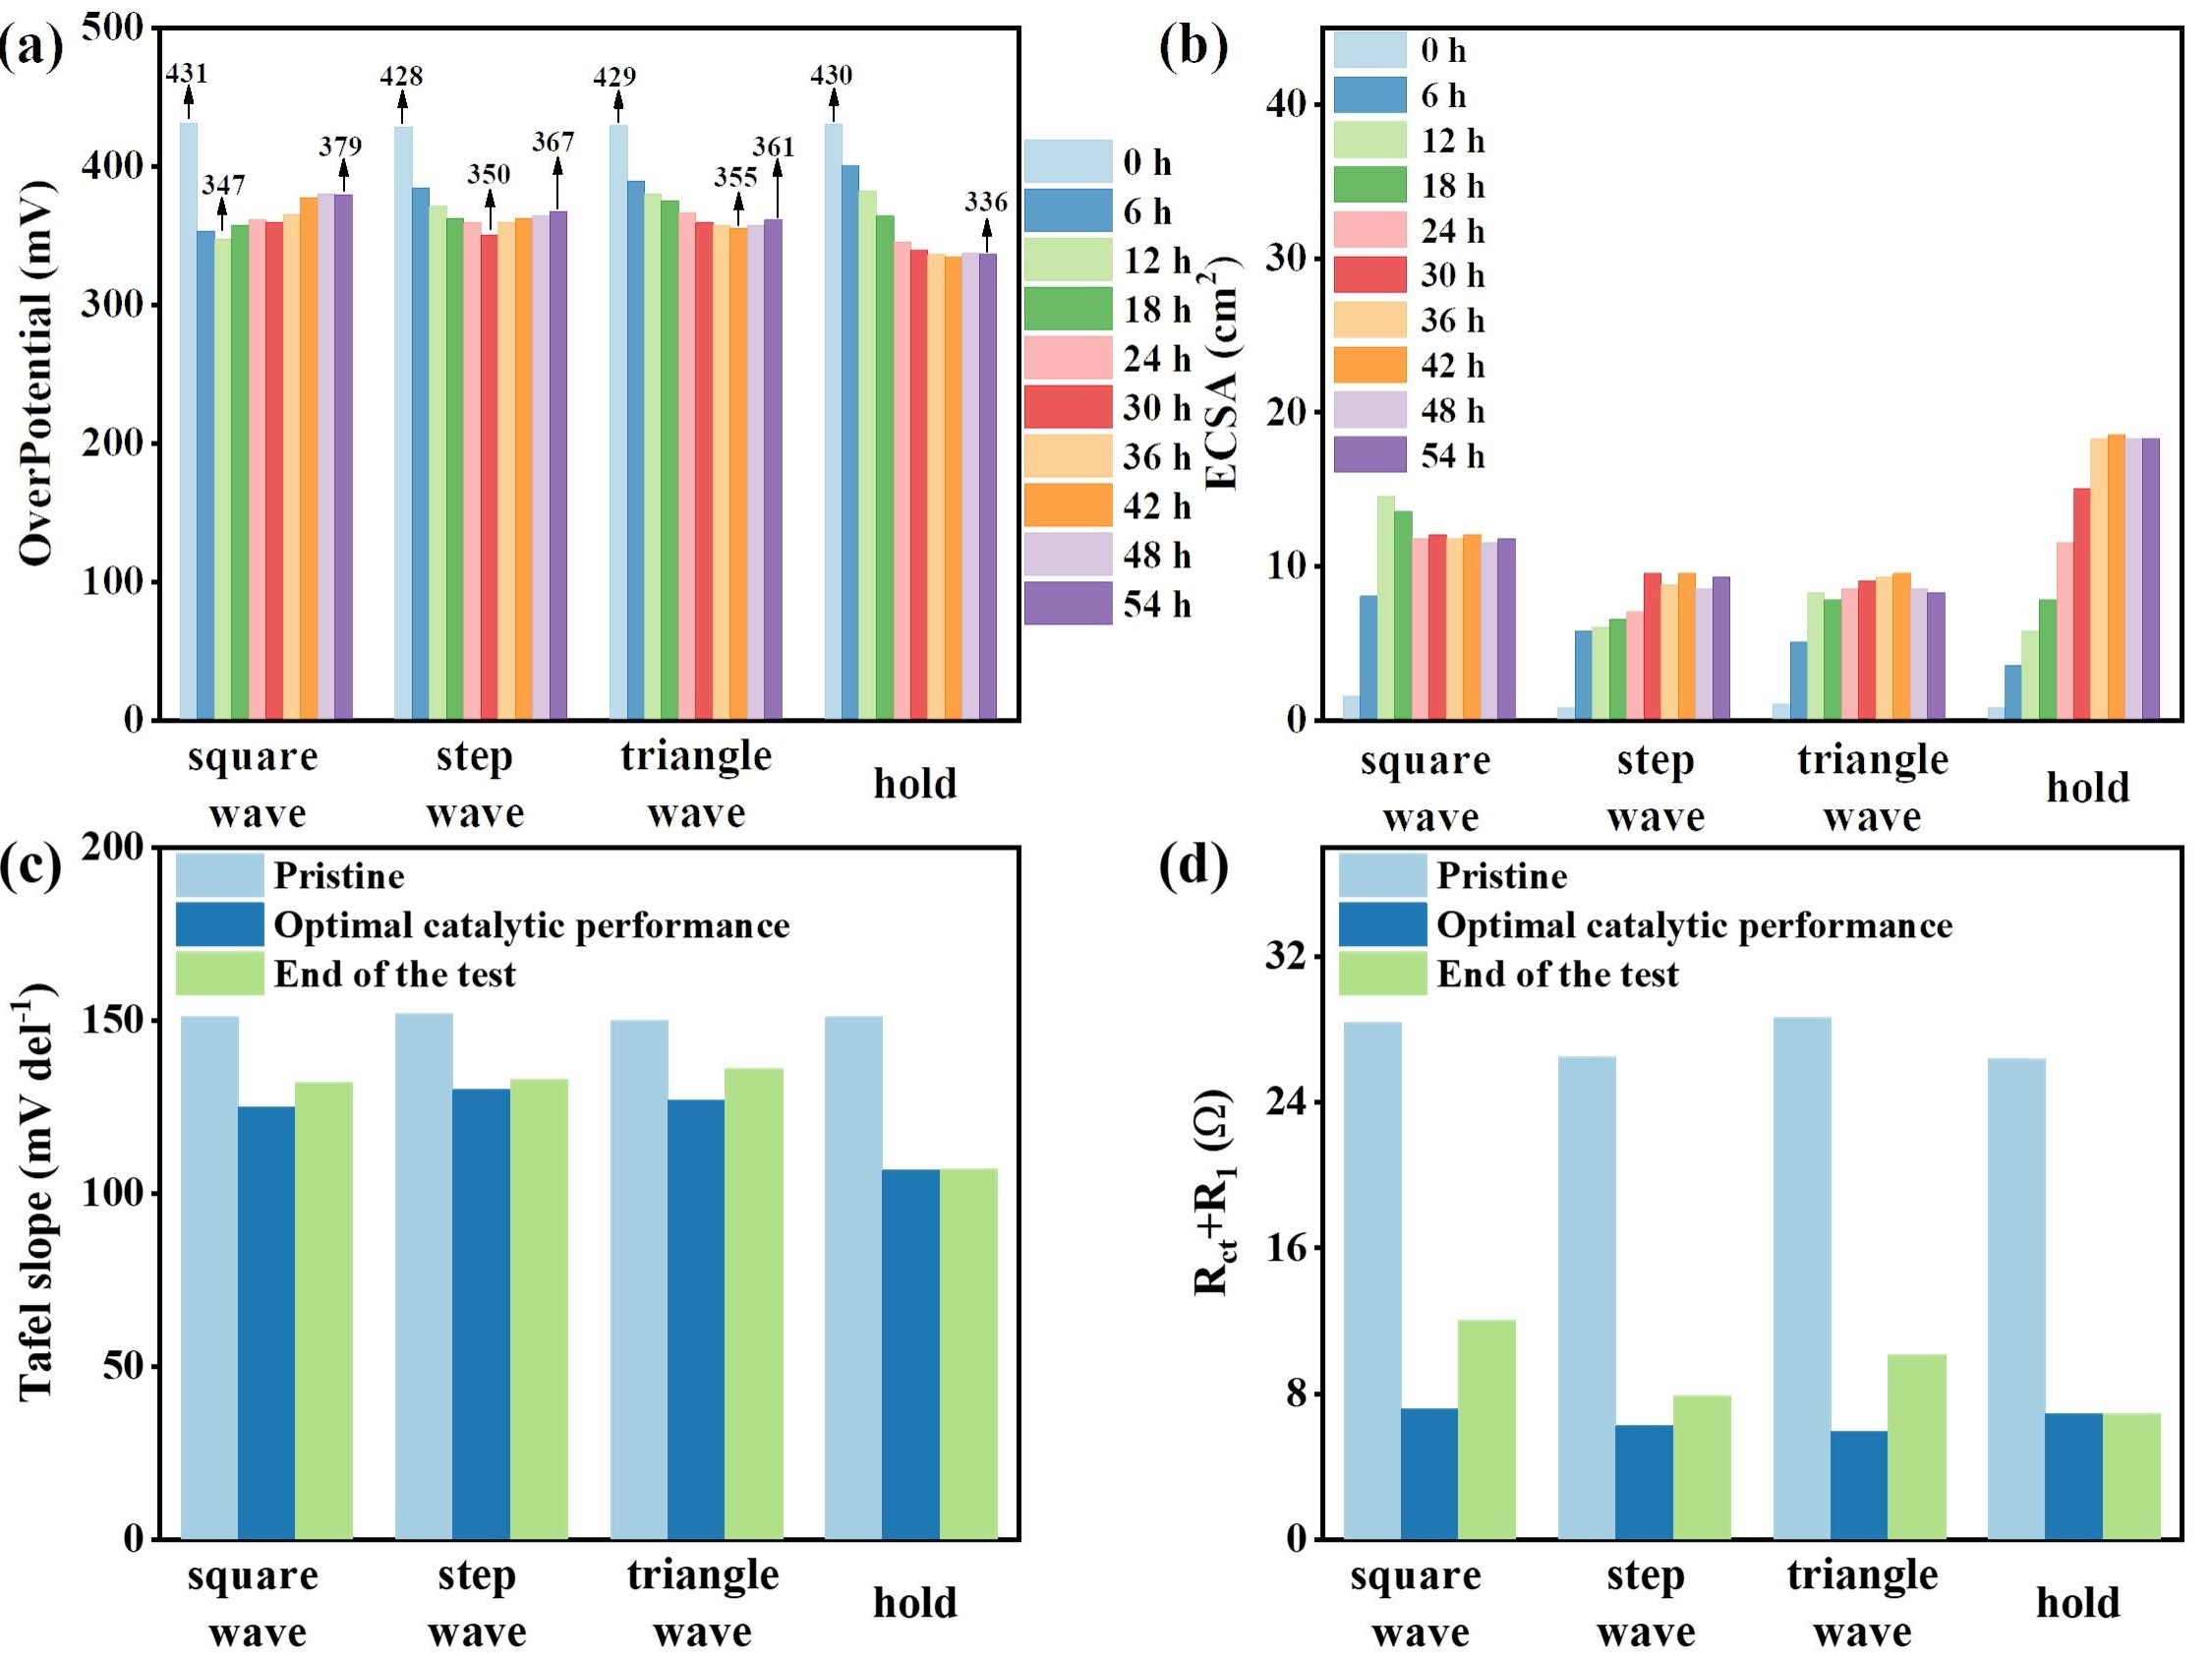

Supplement: s1 [file s1 › 3.jpg]

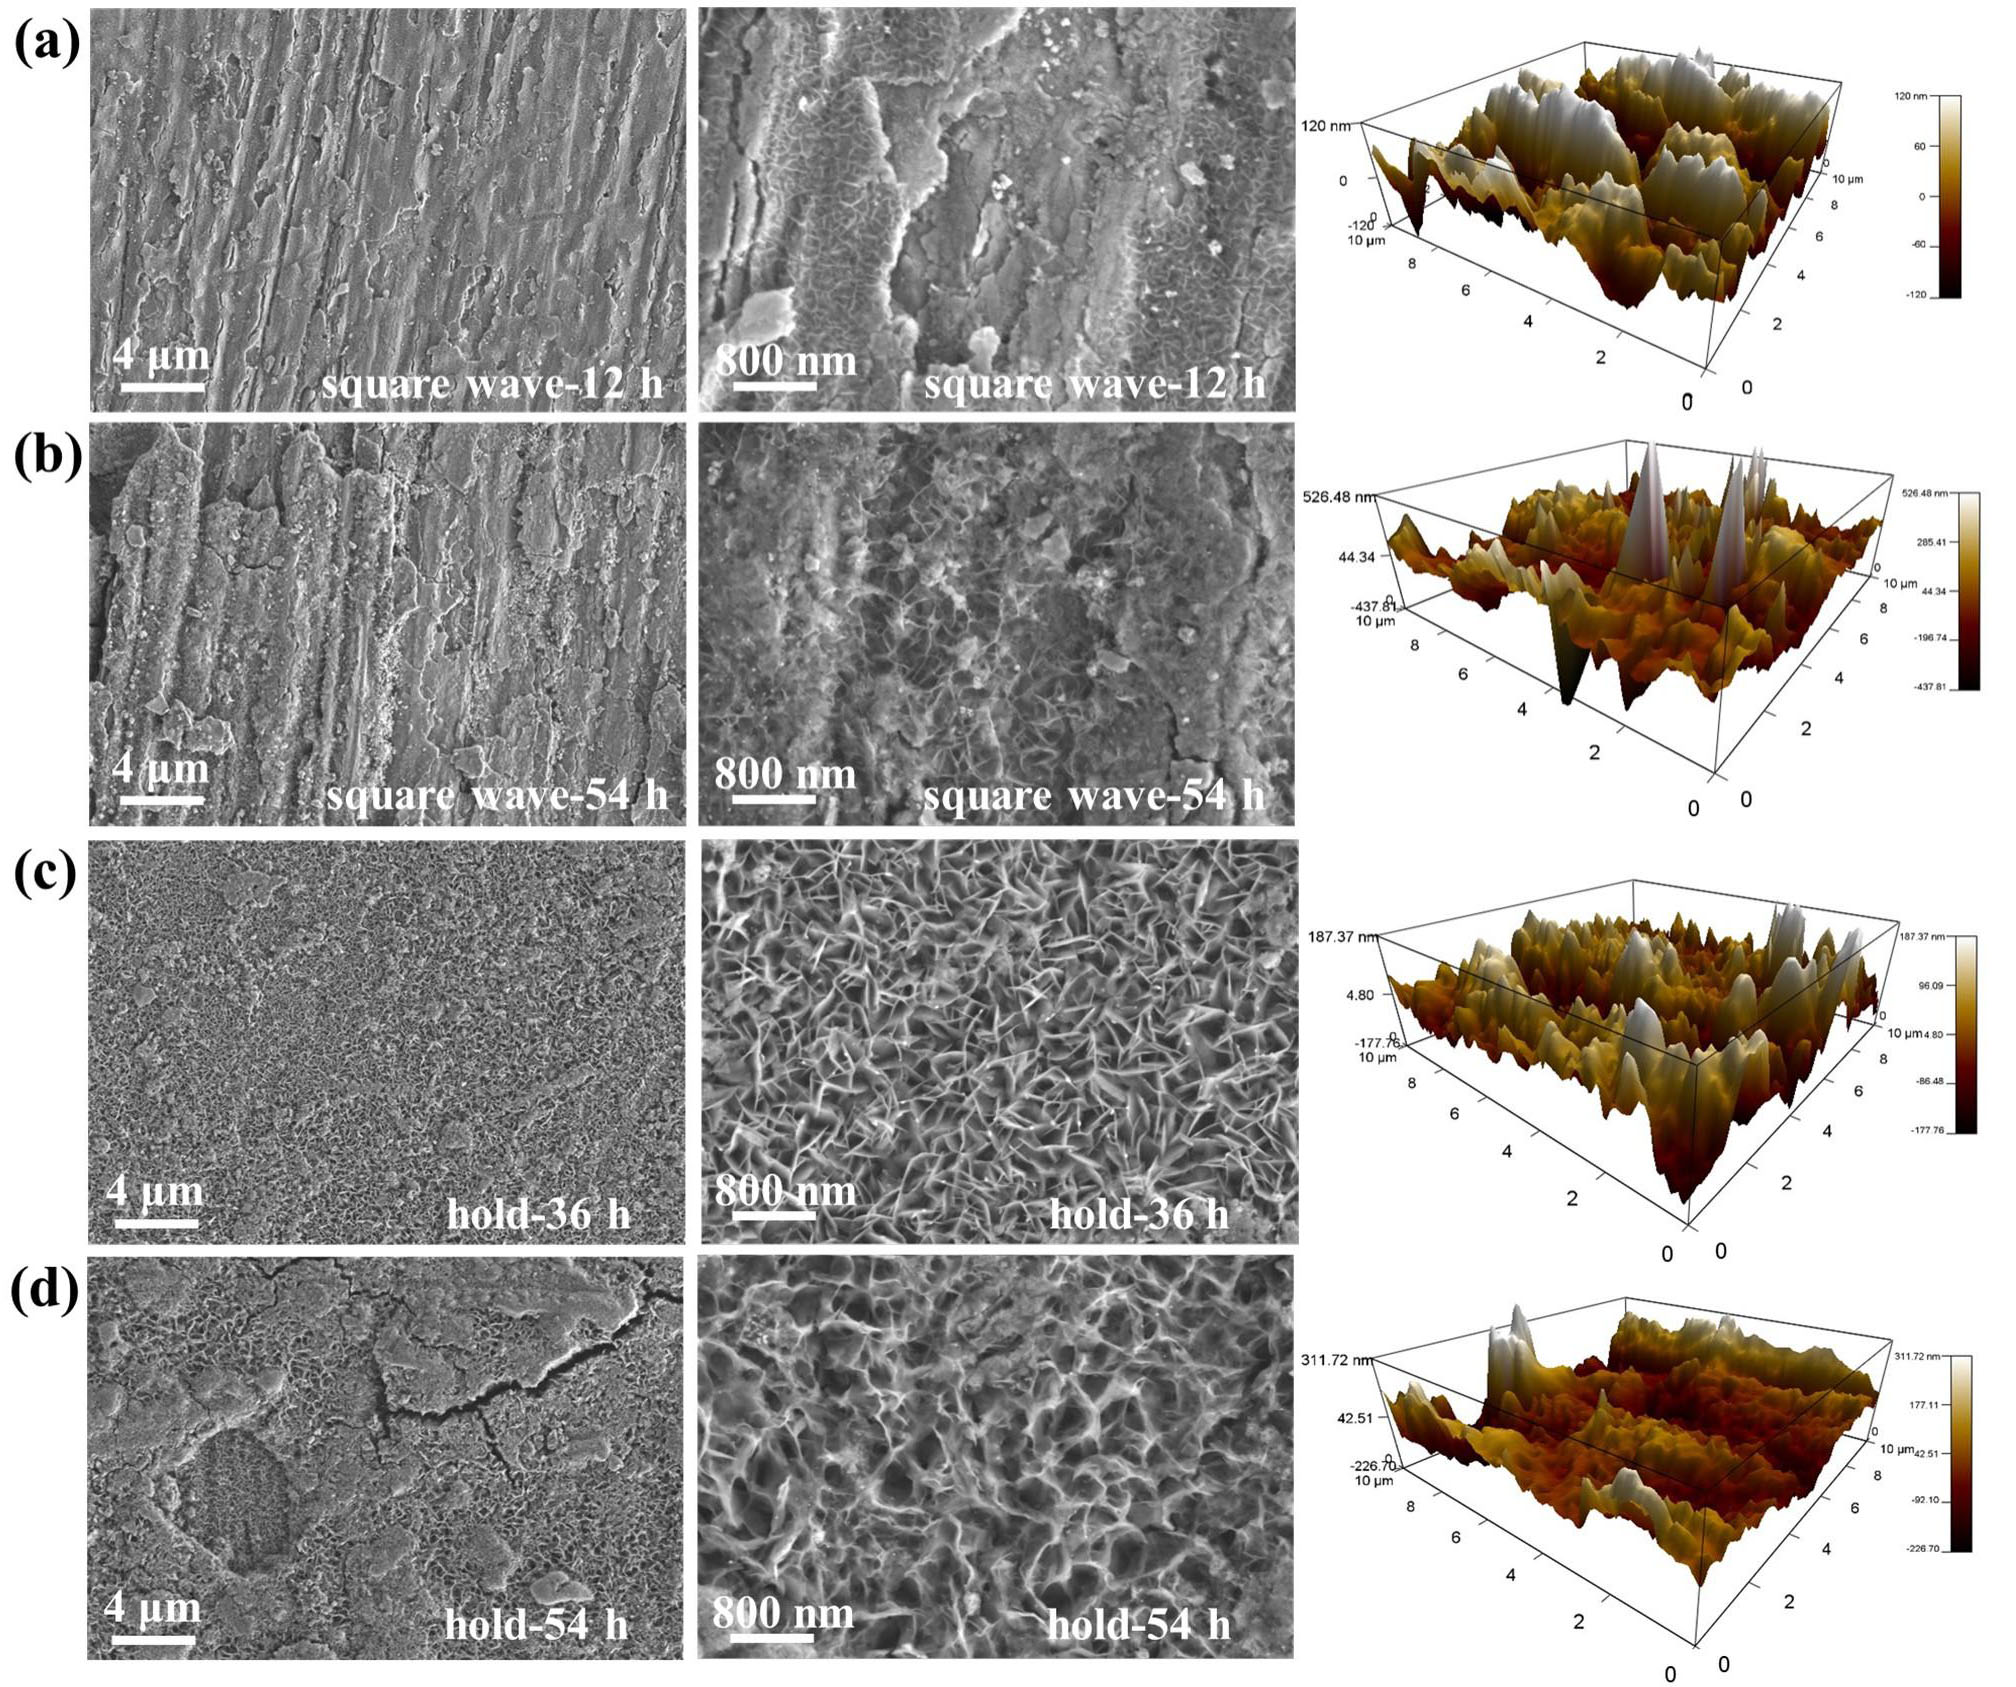

Supplement: s1 [file s1 › 4.jpg]

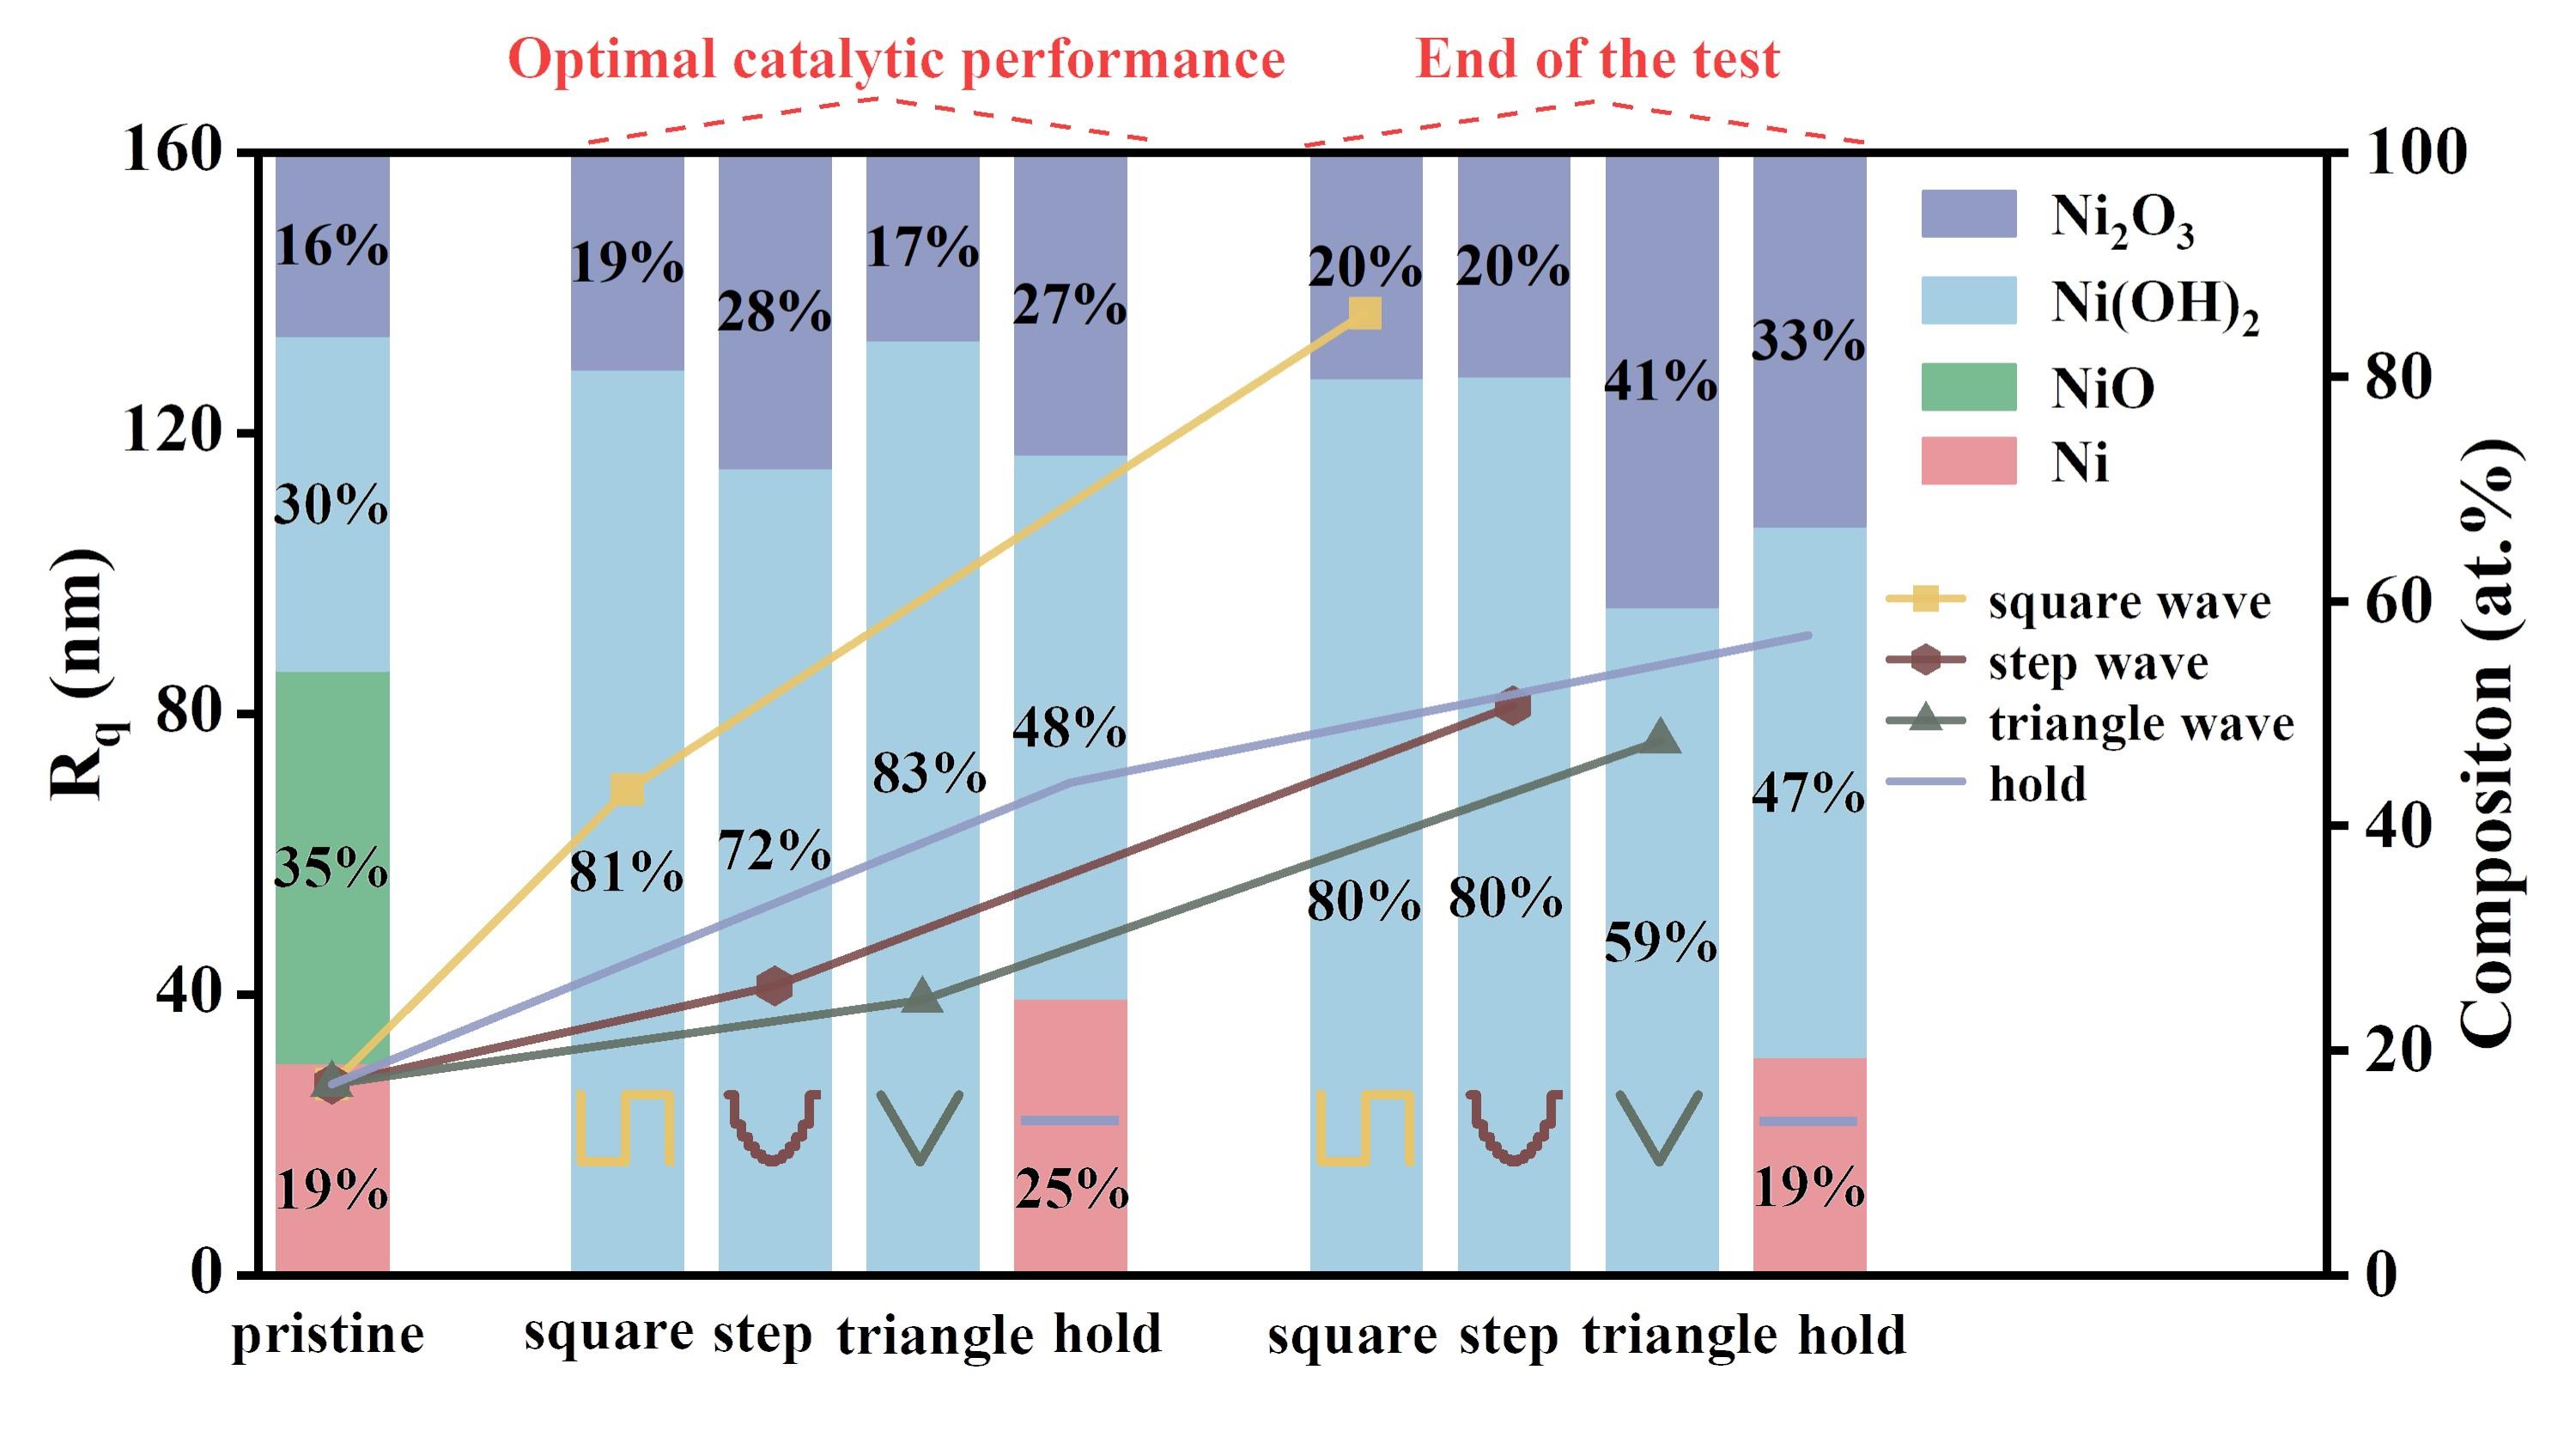

Supplement: s1 [file s1 › 5.jpg]

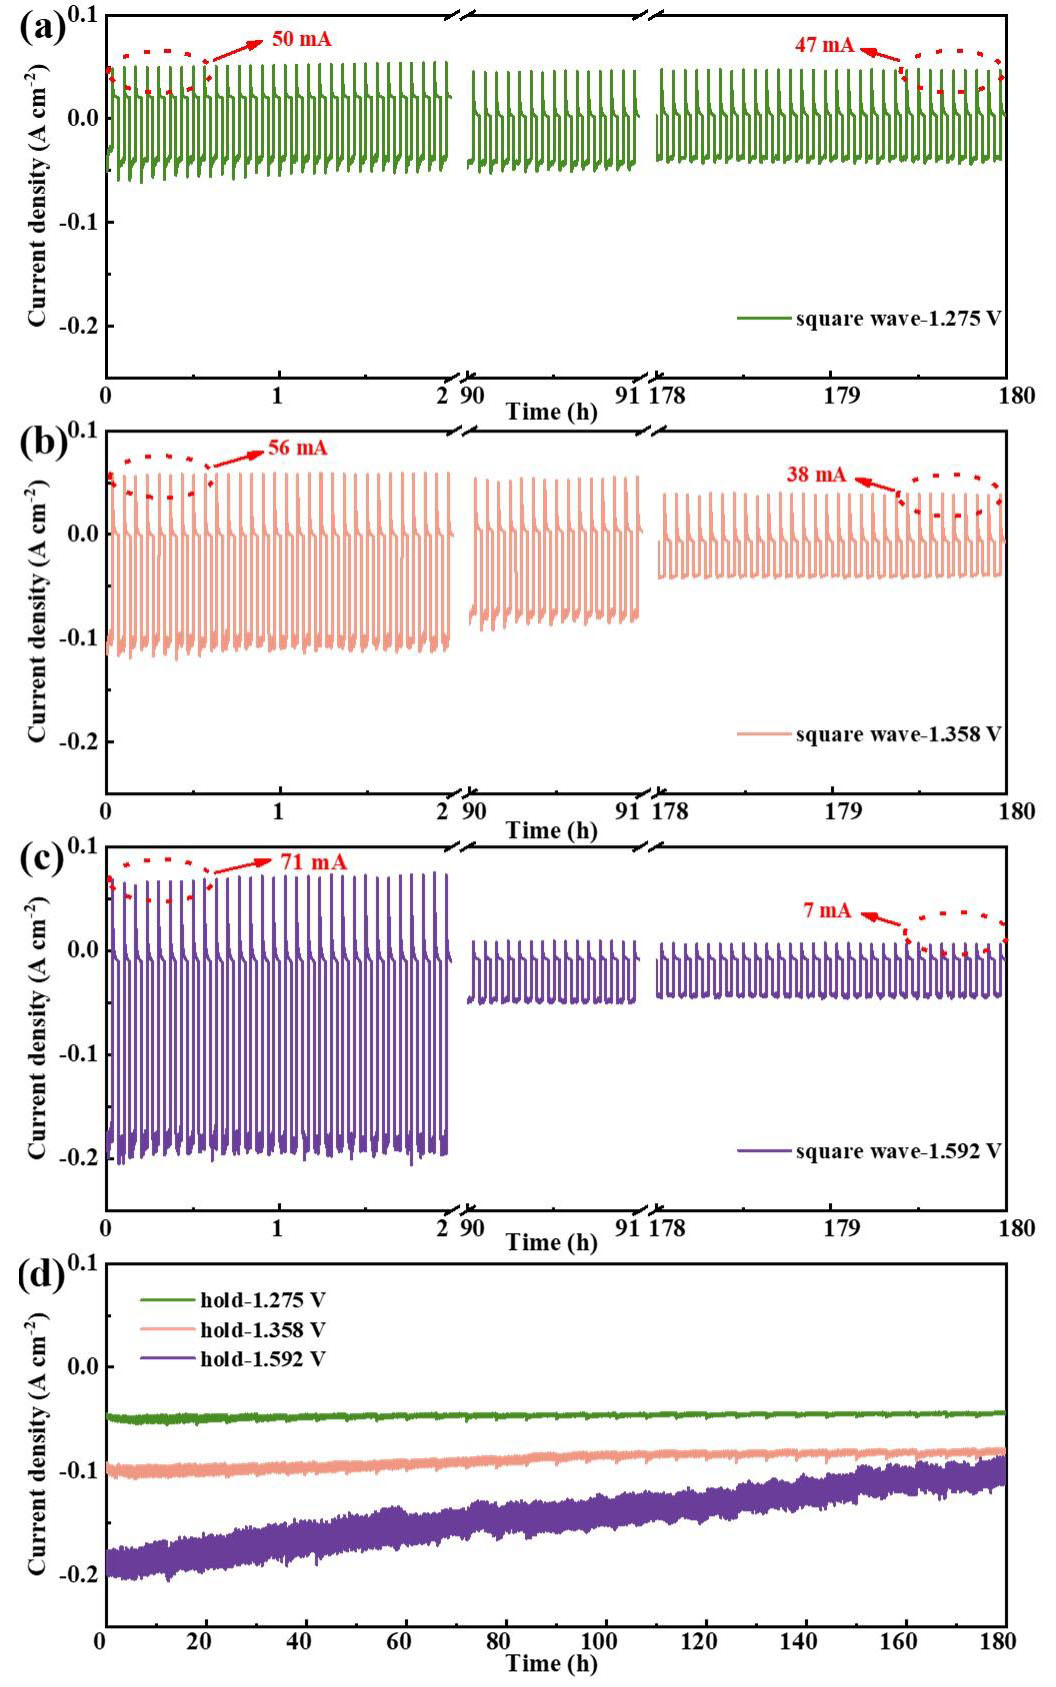

Supplement: s1 [file s1 › 6.jpg]

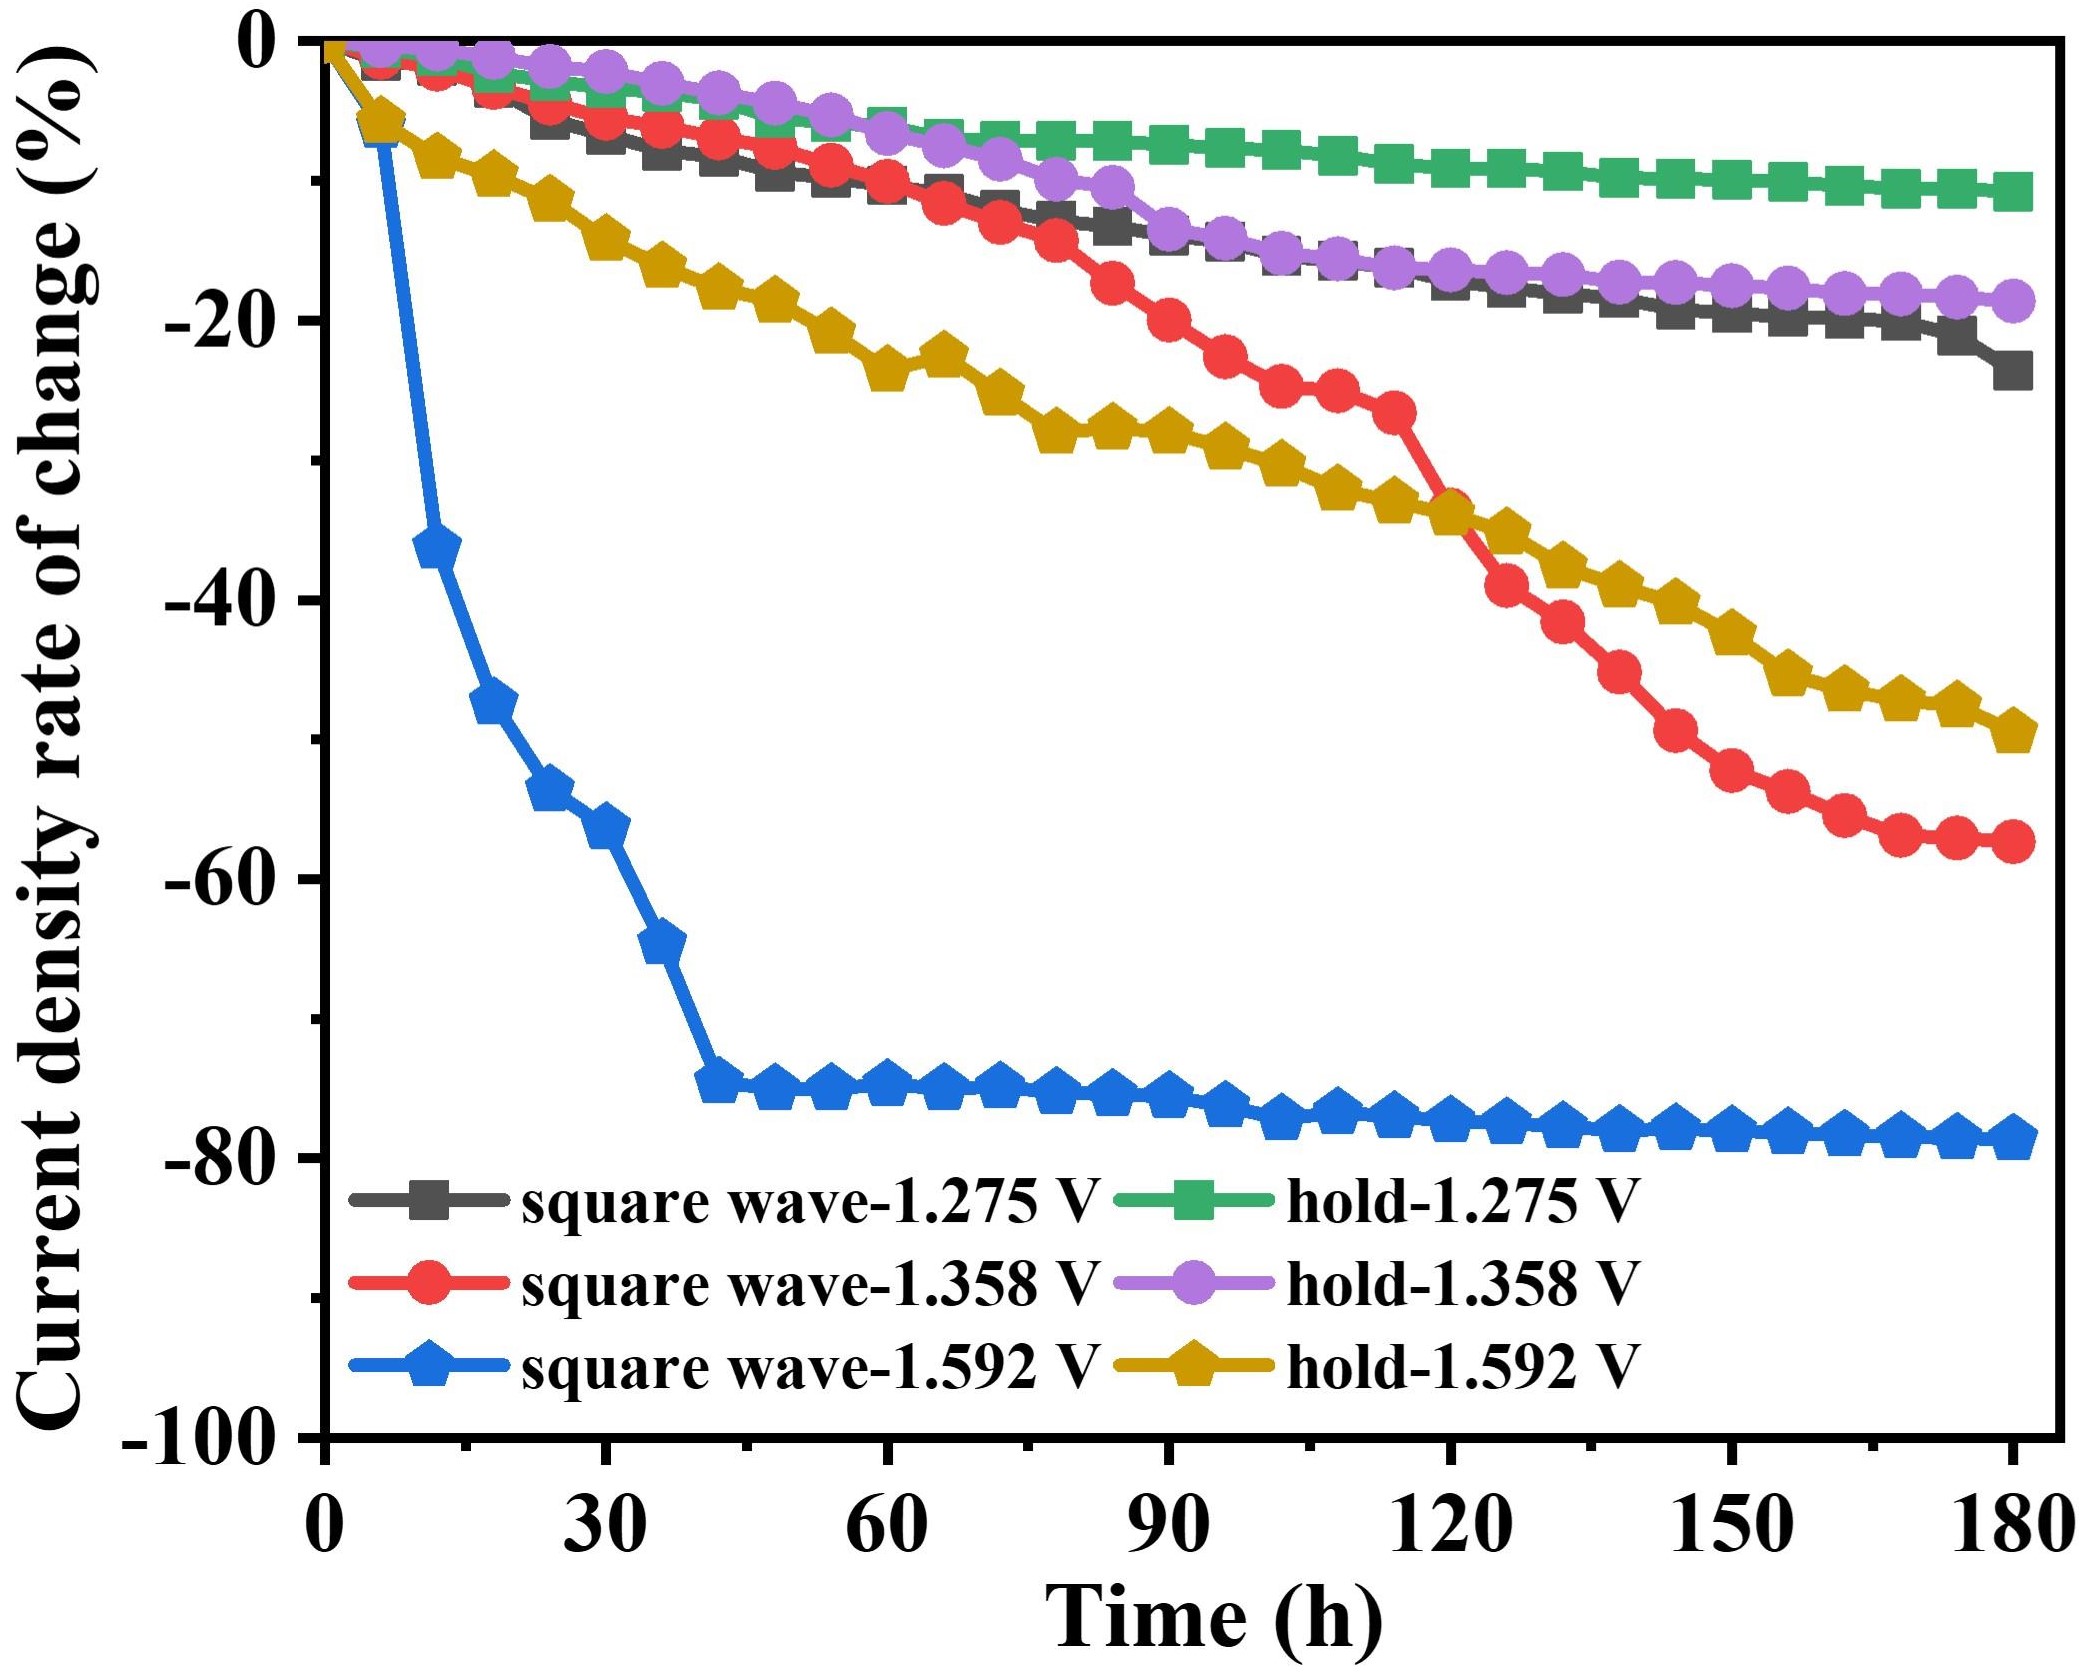

Supplement: s1 [file s1 › 7.jpg]

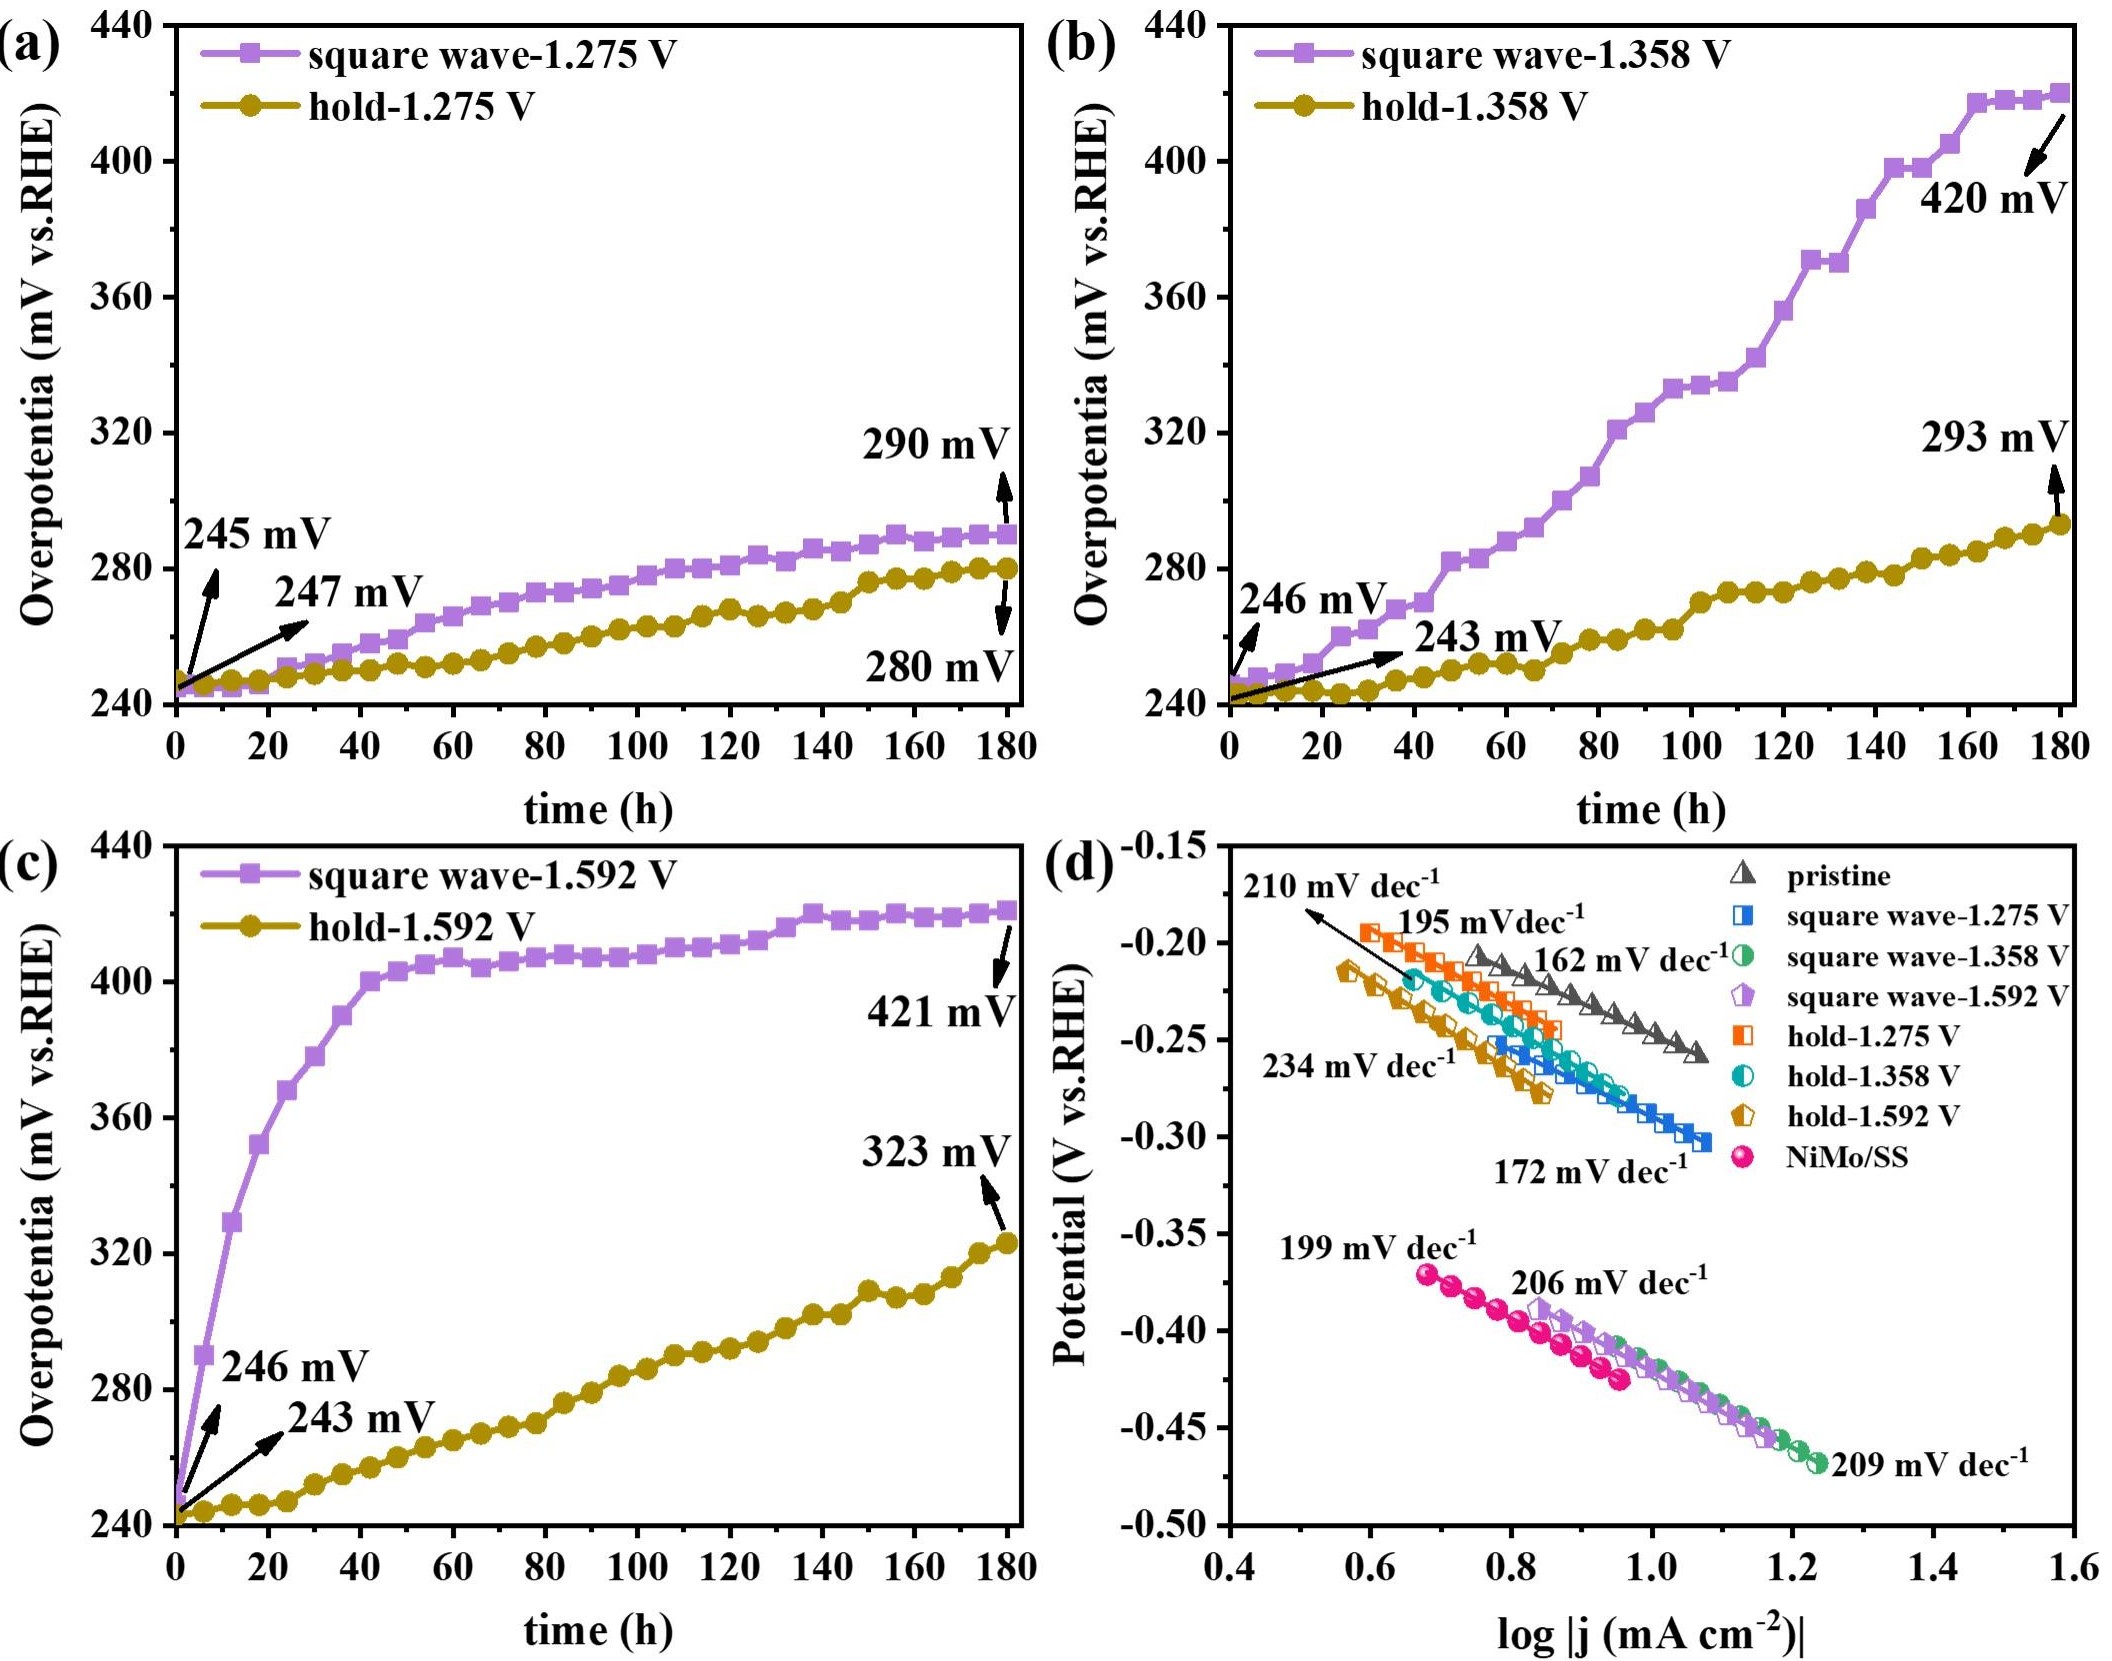

Supplement: s1 [file s1 › 8.jpg]

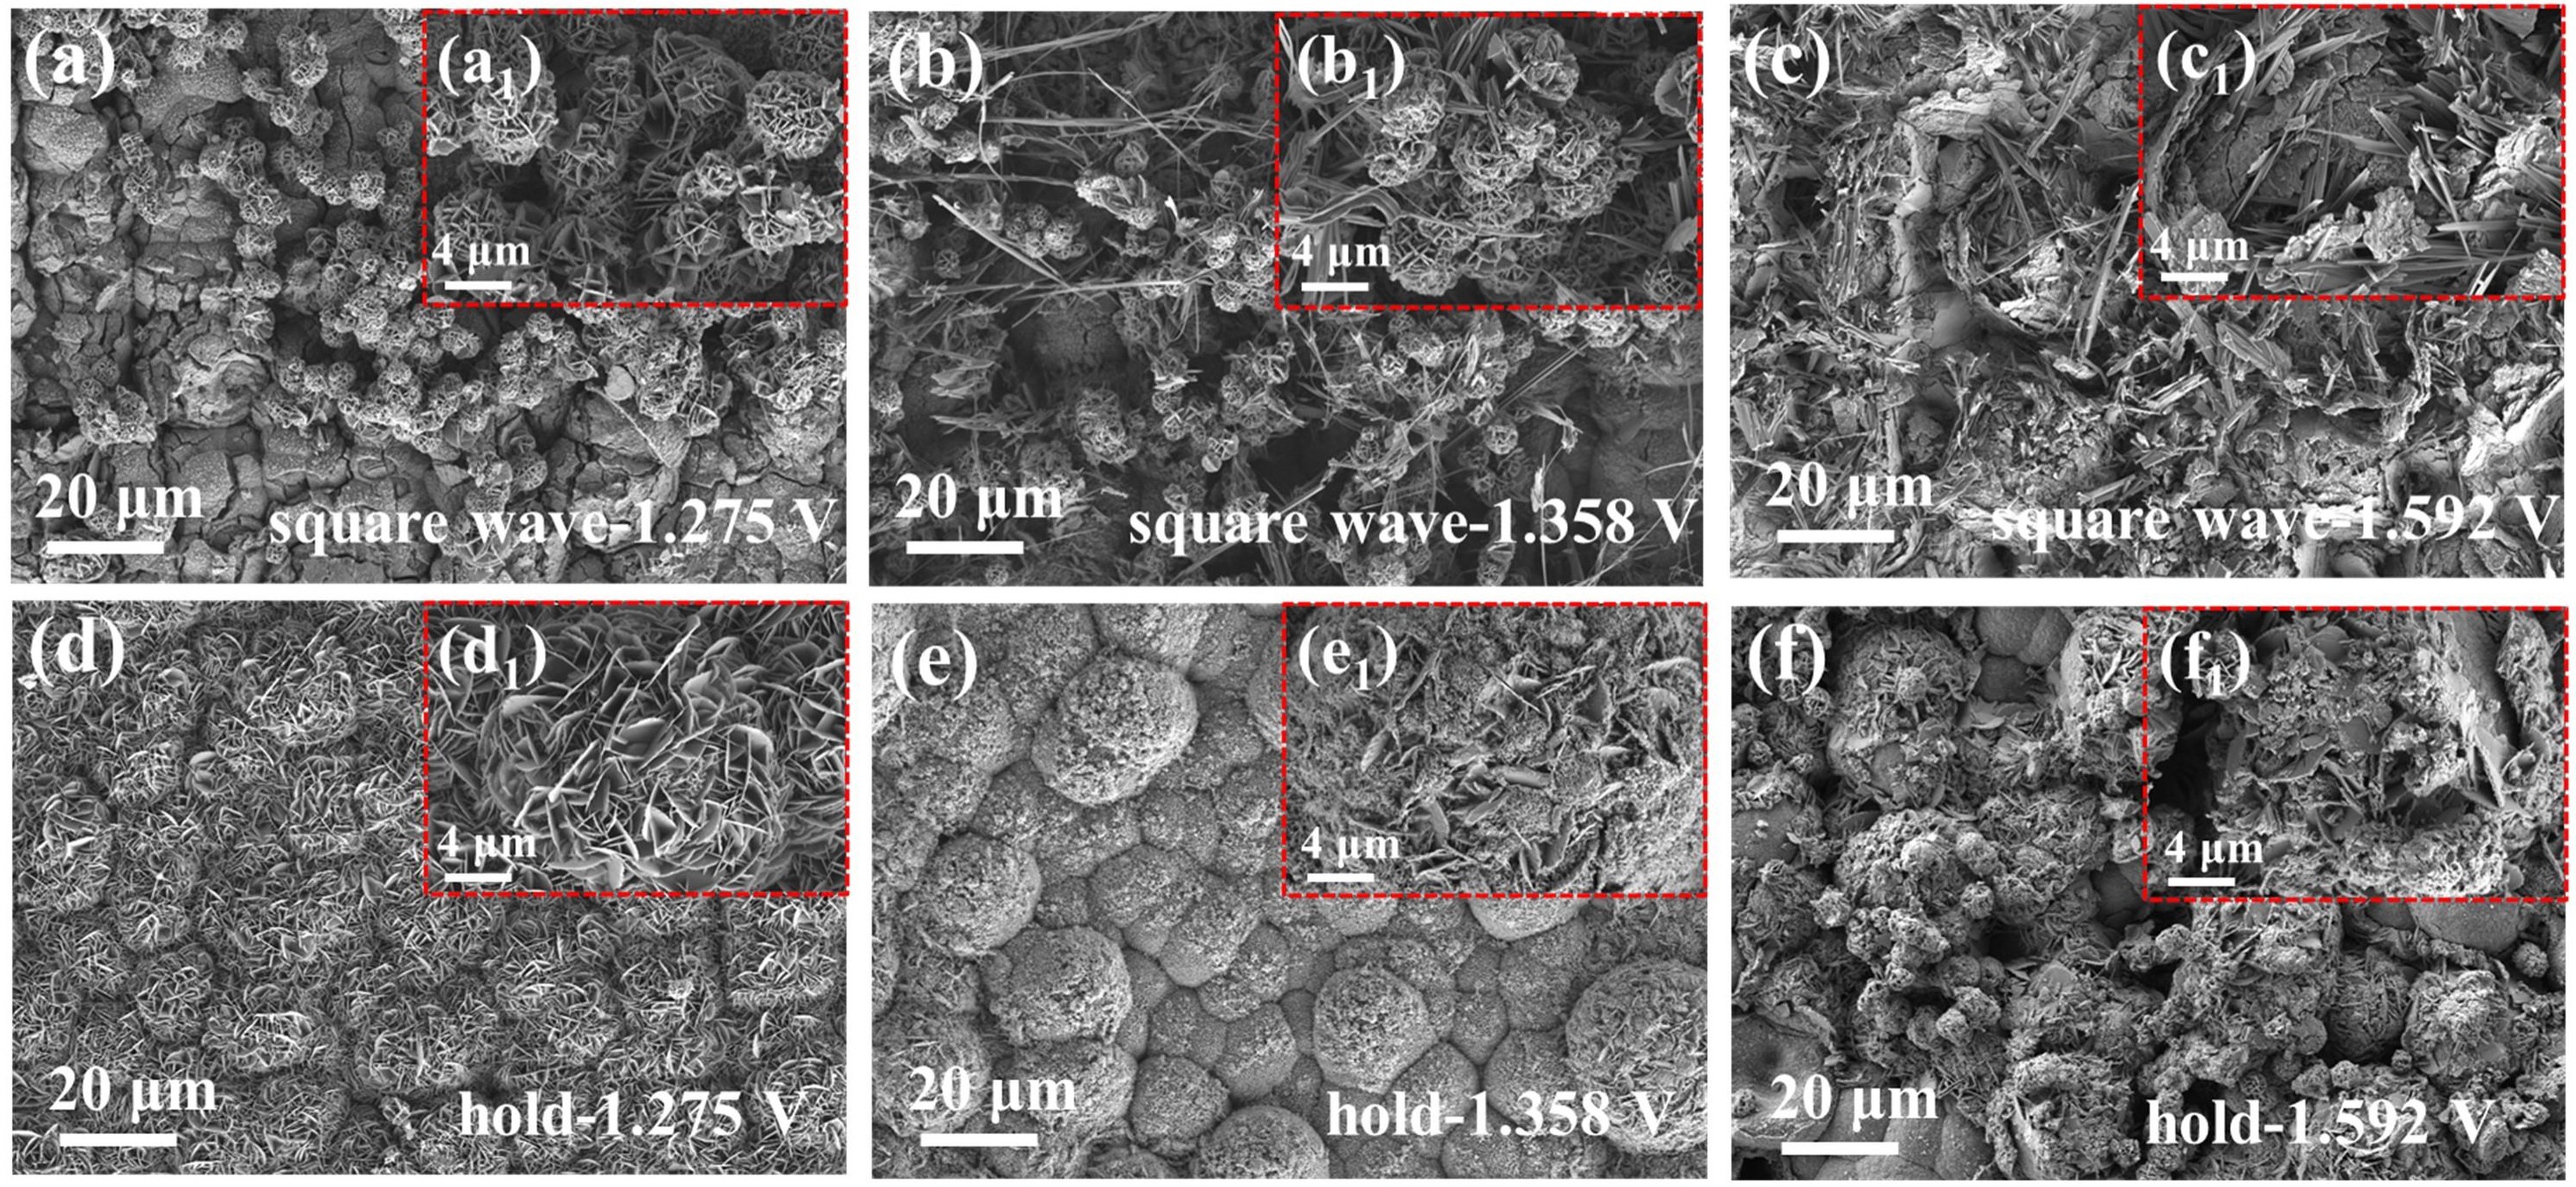

Supplement: s1 [file s1 › 9.jpg]

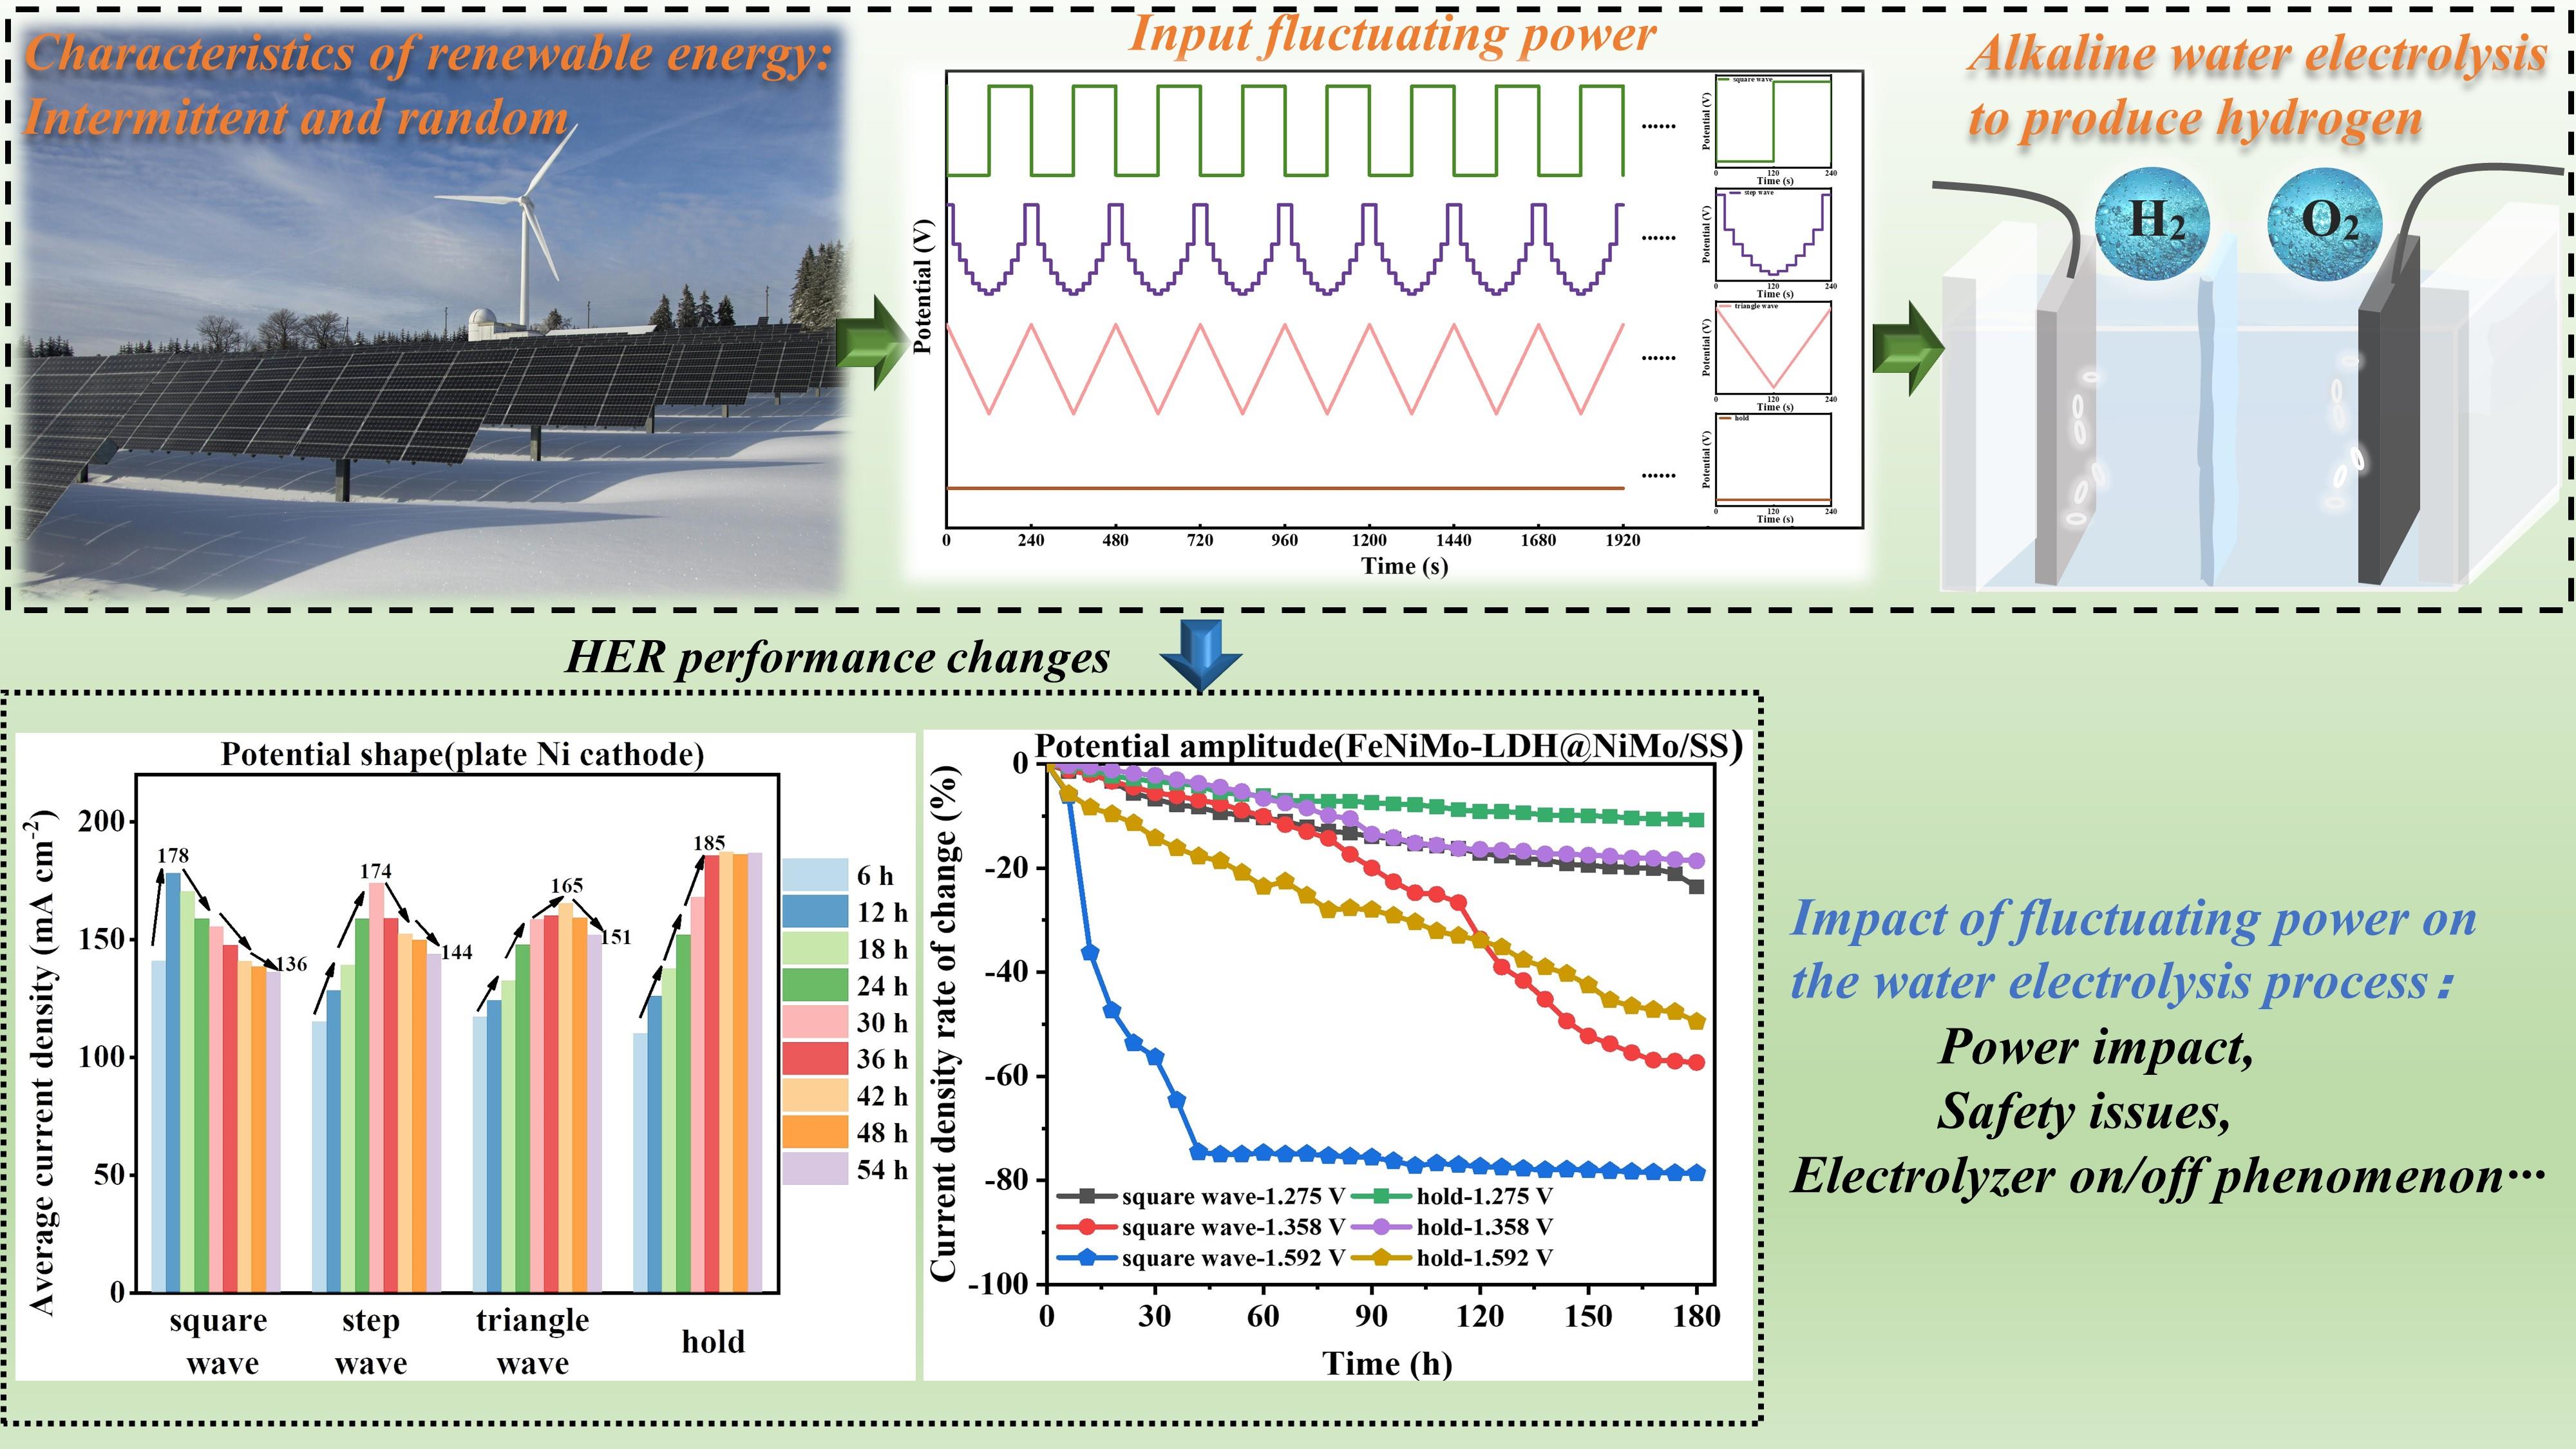

Supplement: s1 [file s1 › Graphical Abstract.jpeg]

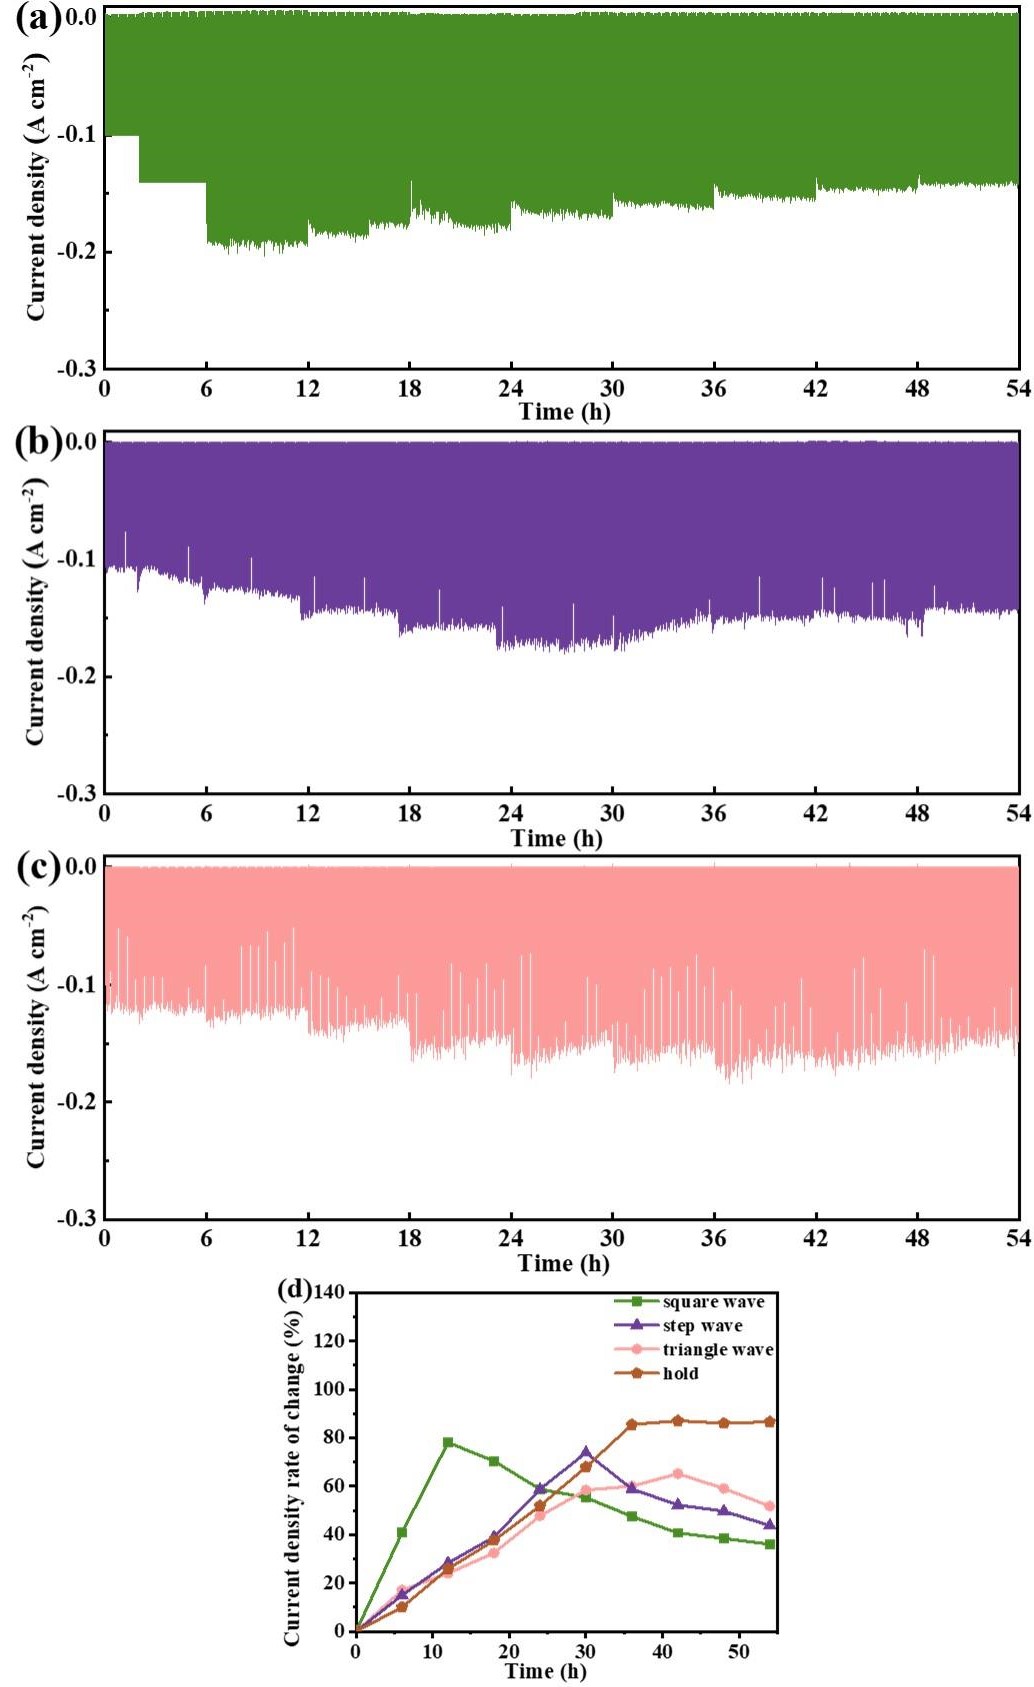

Supplement: s1 [file s1 › s1.jpg]

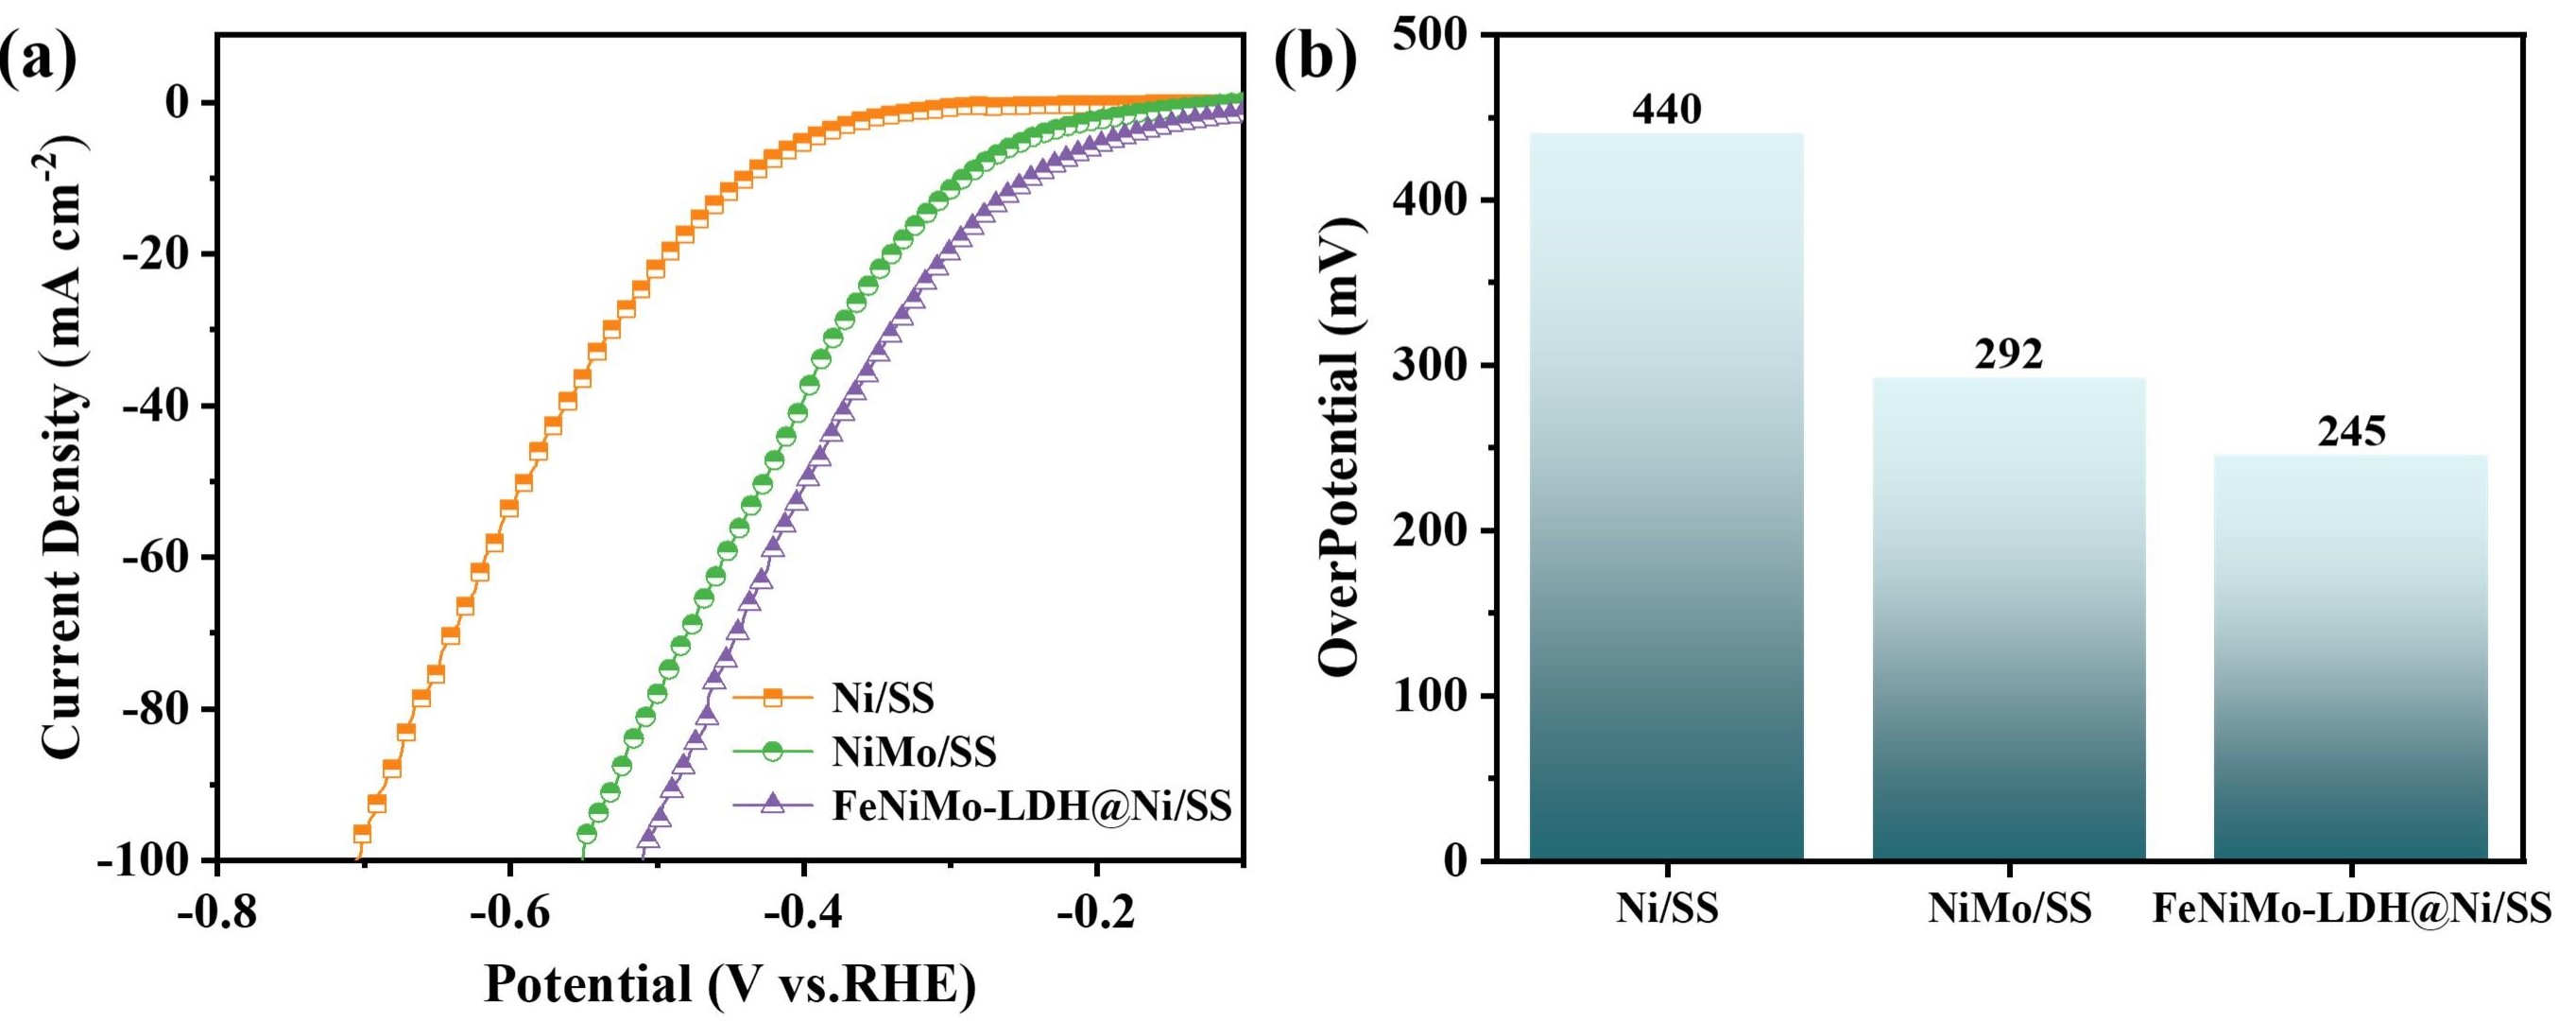

Supplement: s1 [file s1 › s10.jpg]

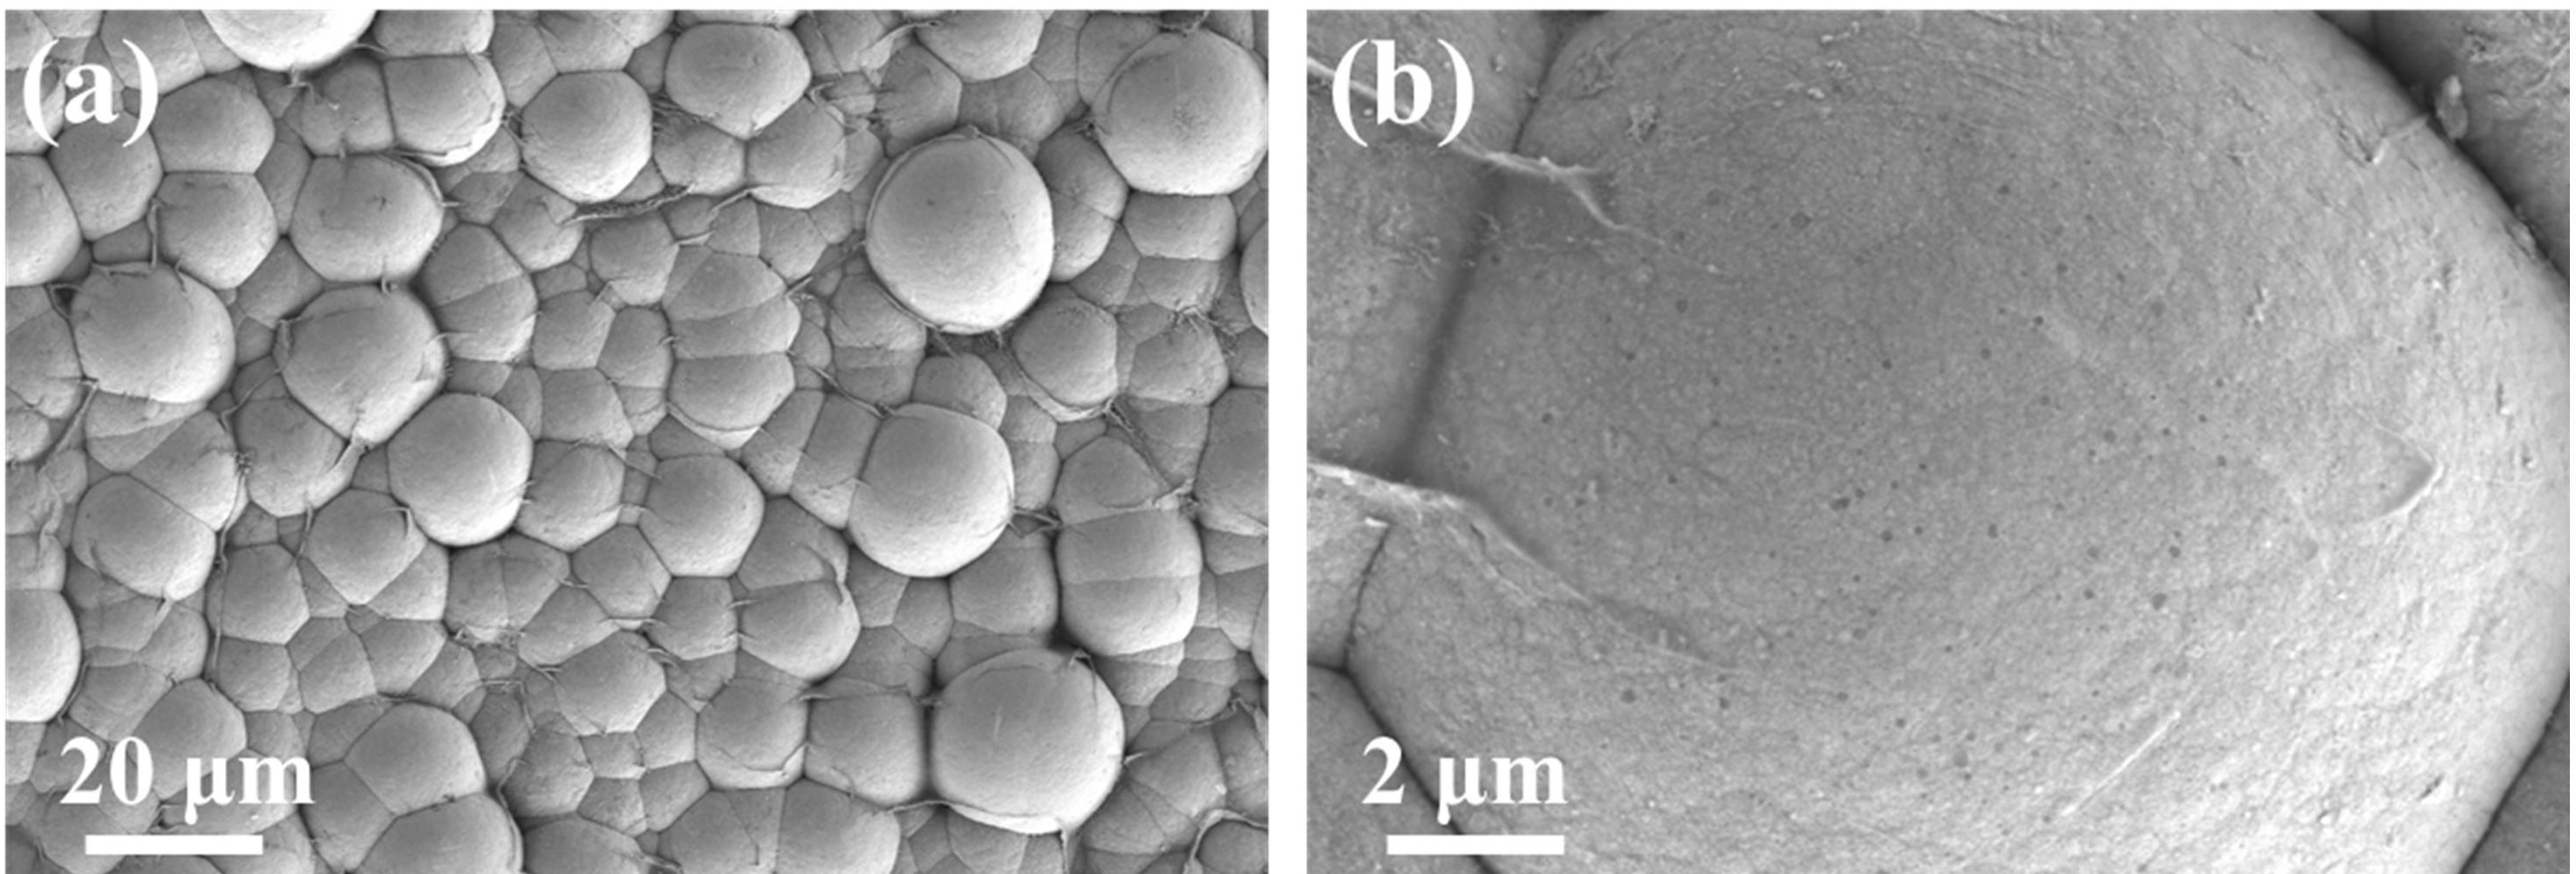

Supplement: s1 [file s1 › s11.jpg]

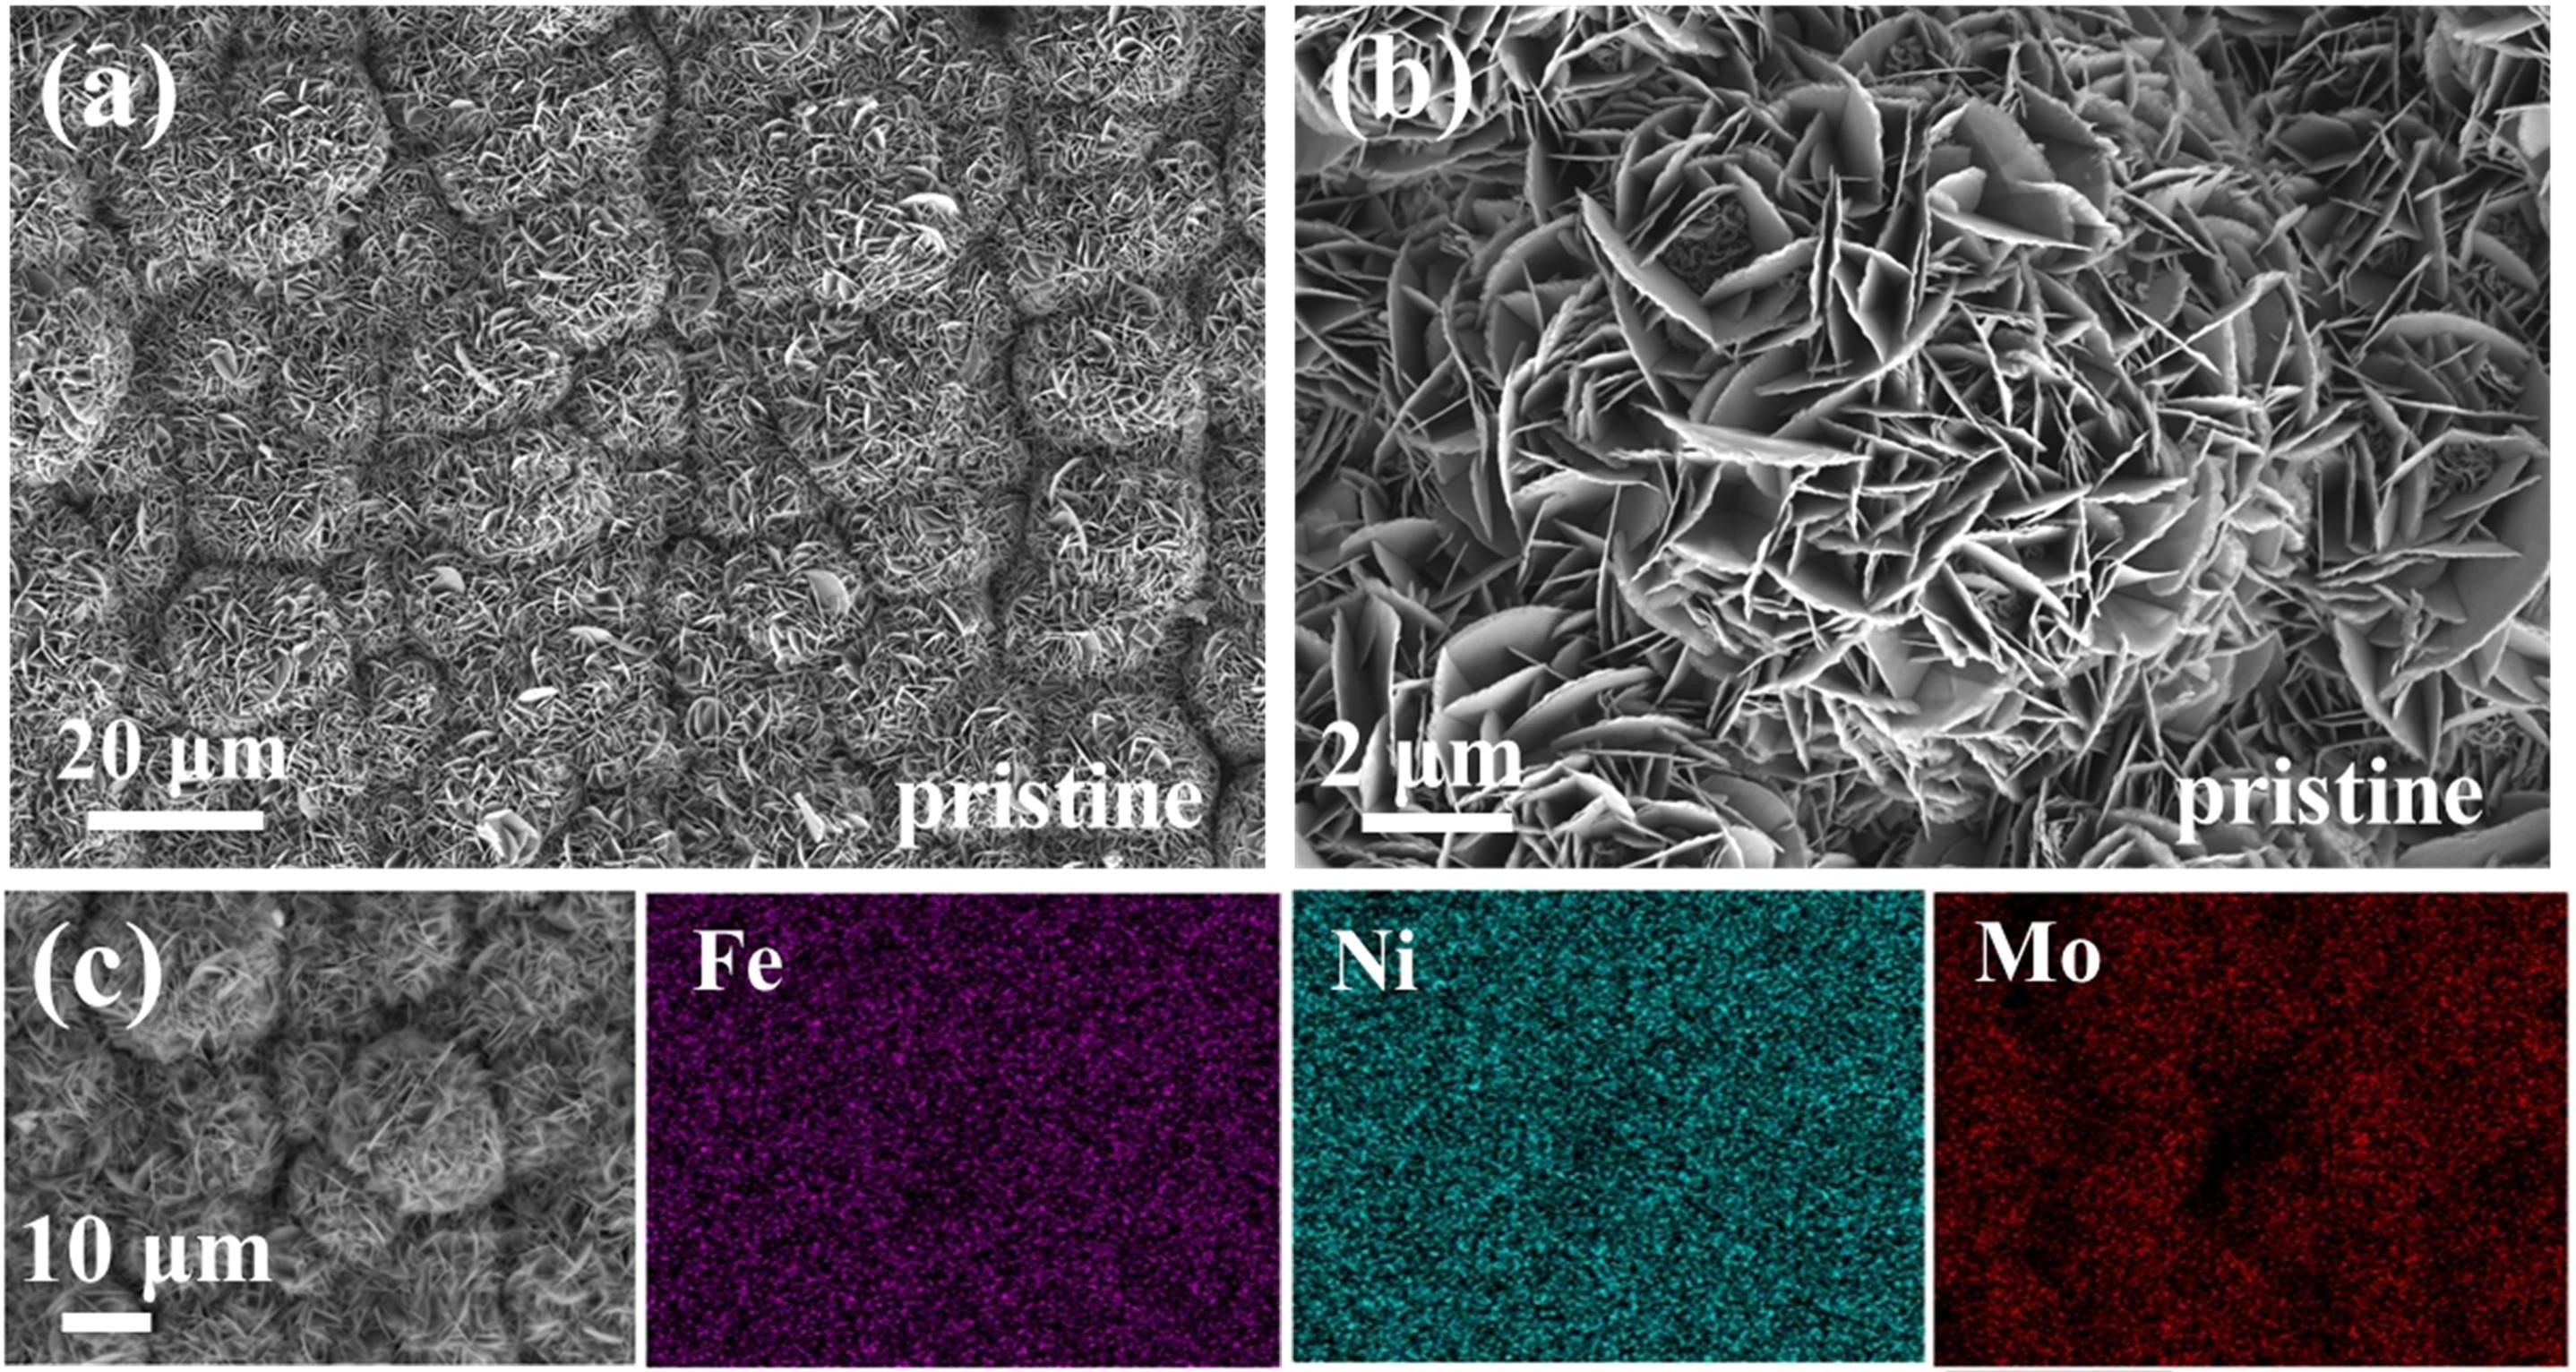

Supplement: s1 [file s1 › s12.jpg]

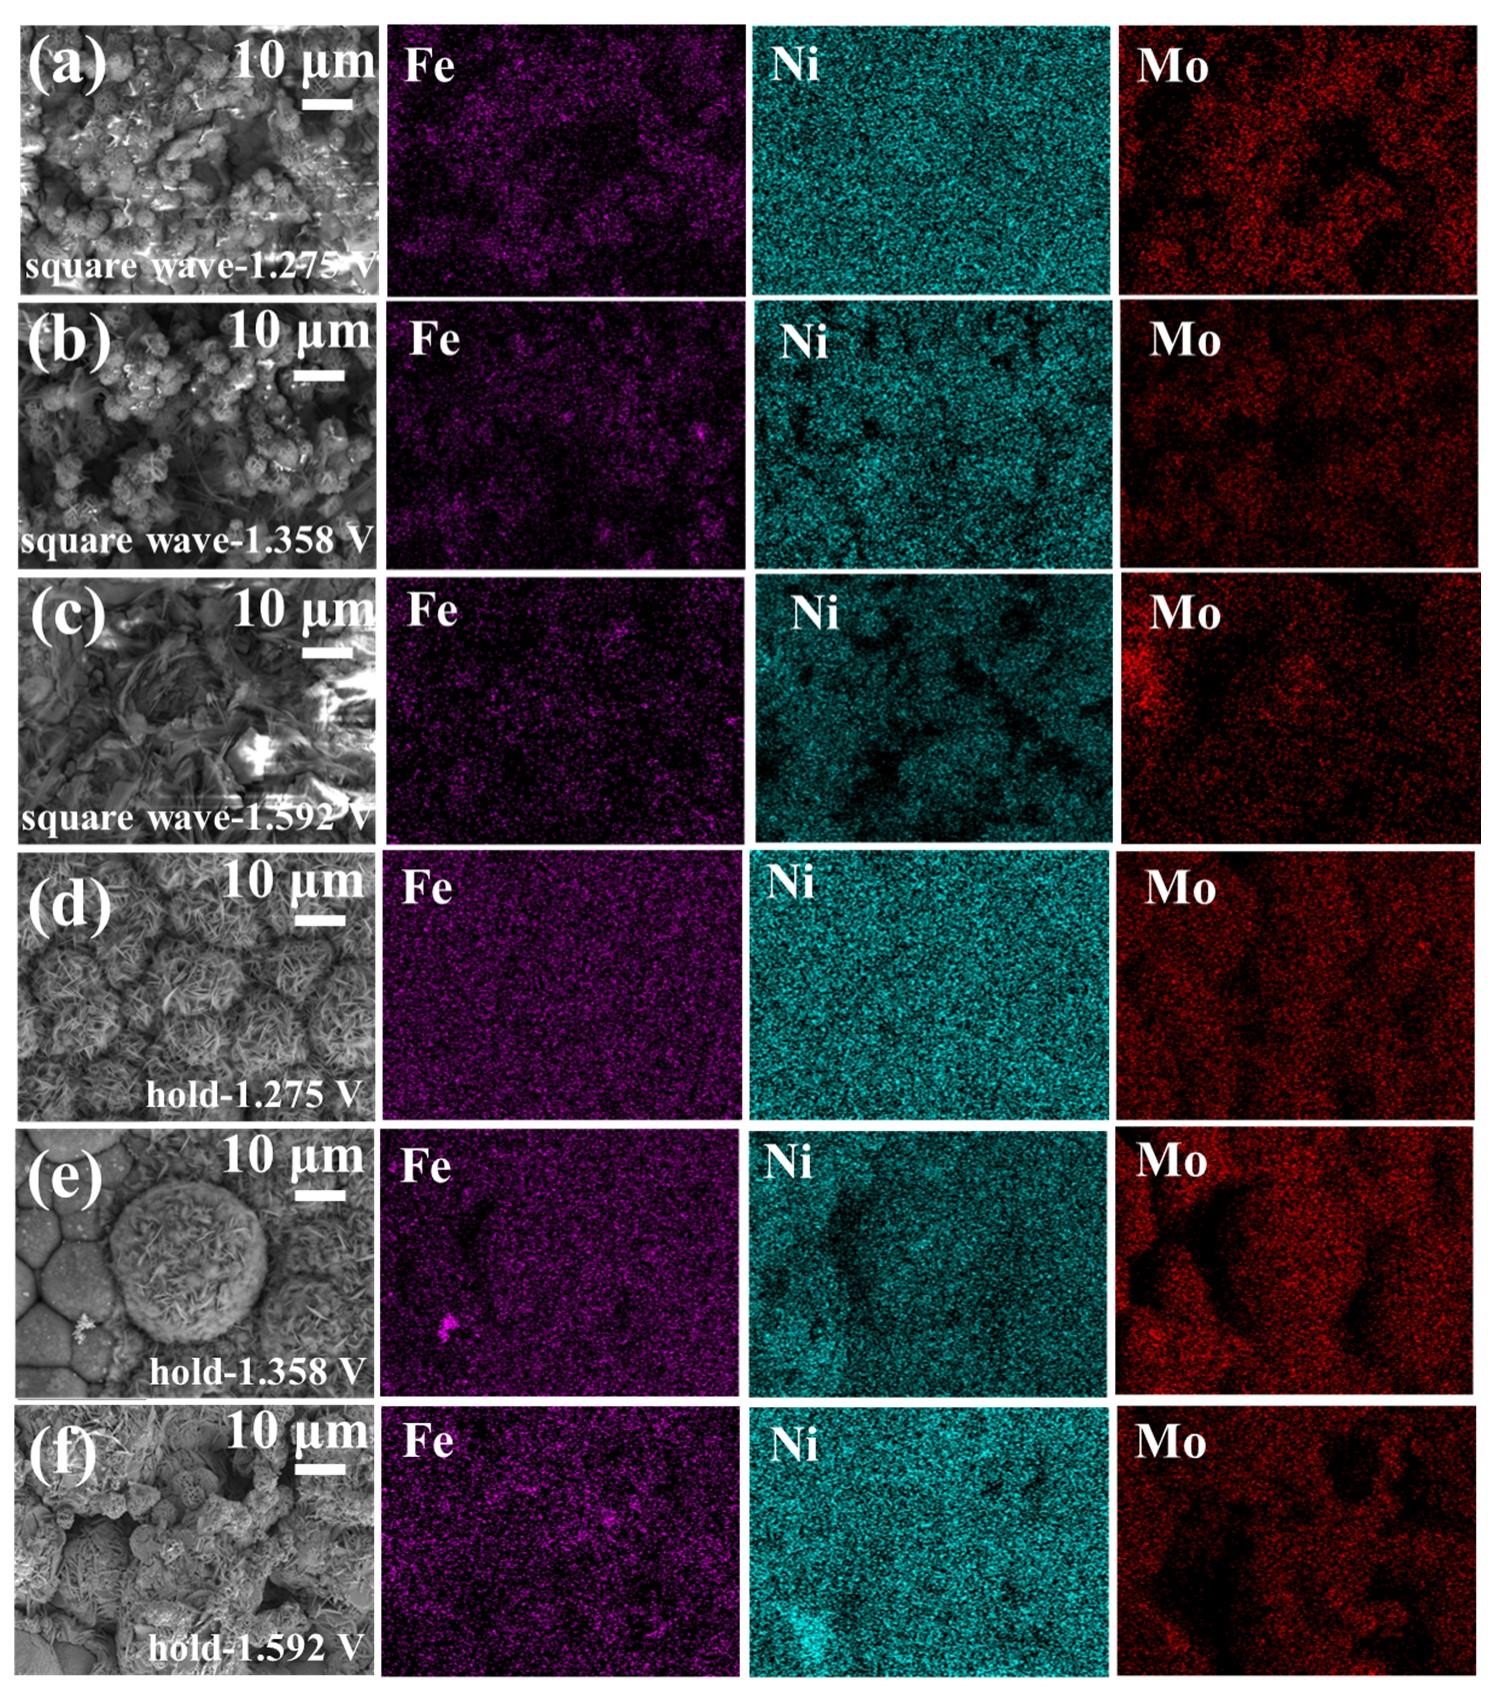

Supplement: s1 [file s1 › s13.jpg]

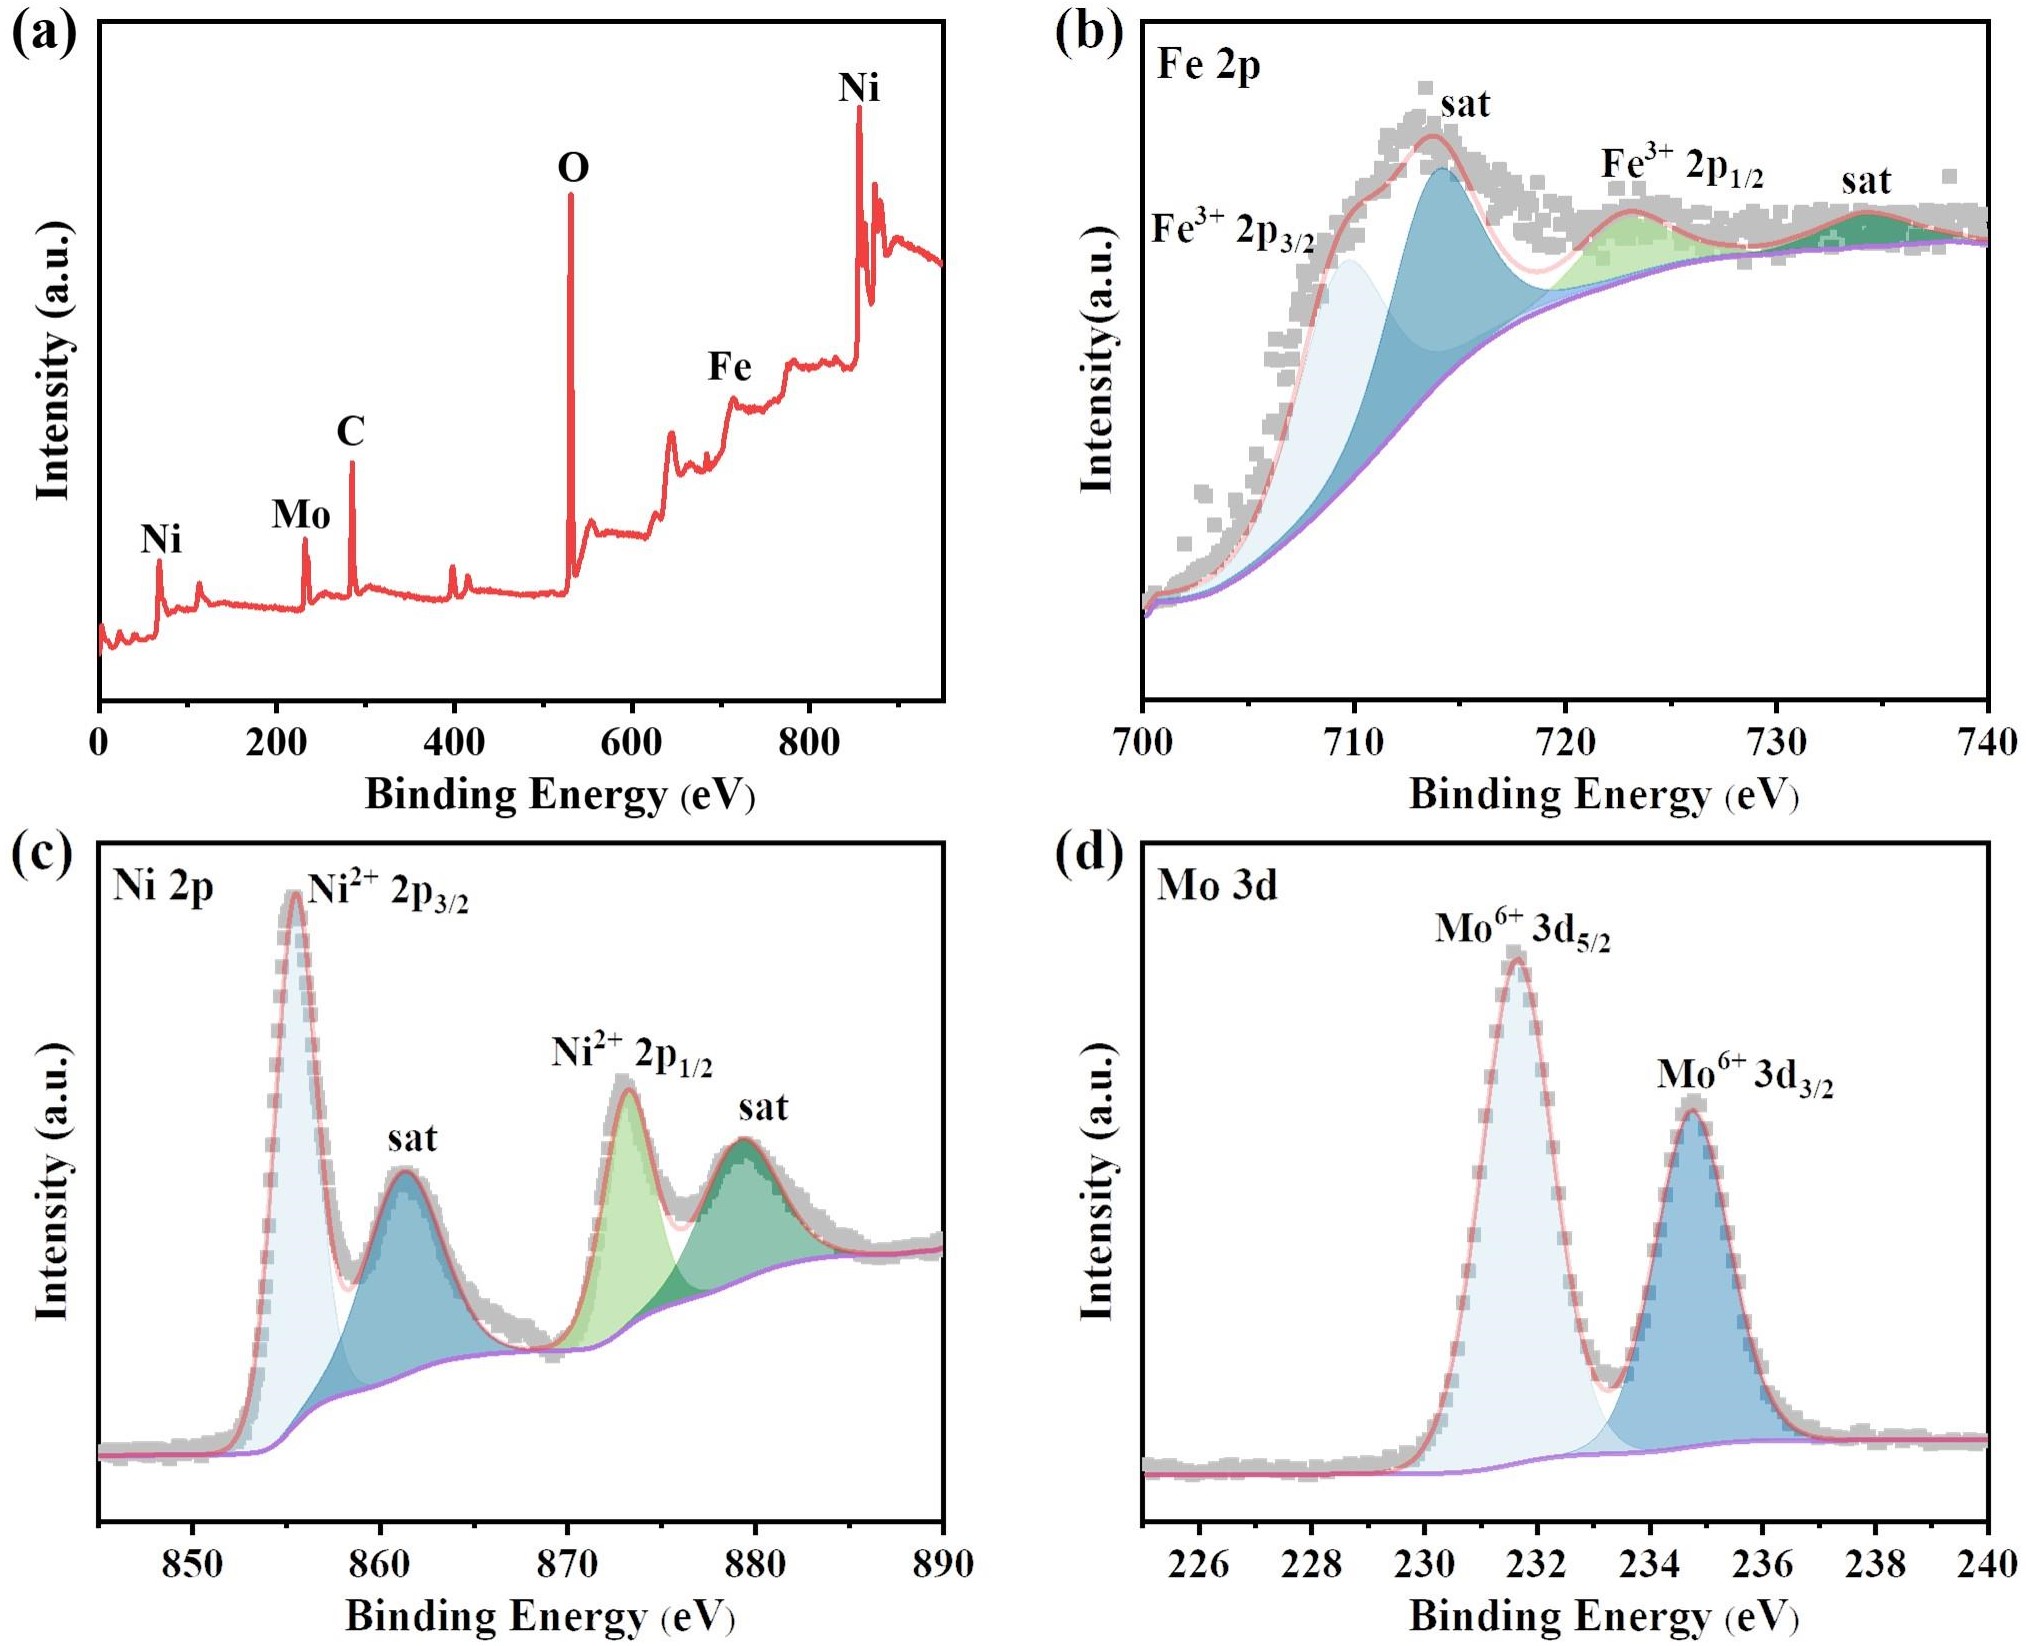

Supplement: s1 [file s1 › s14.jpg]

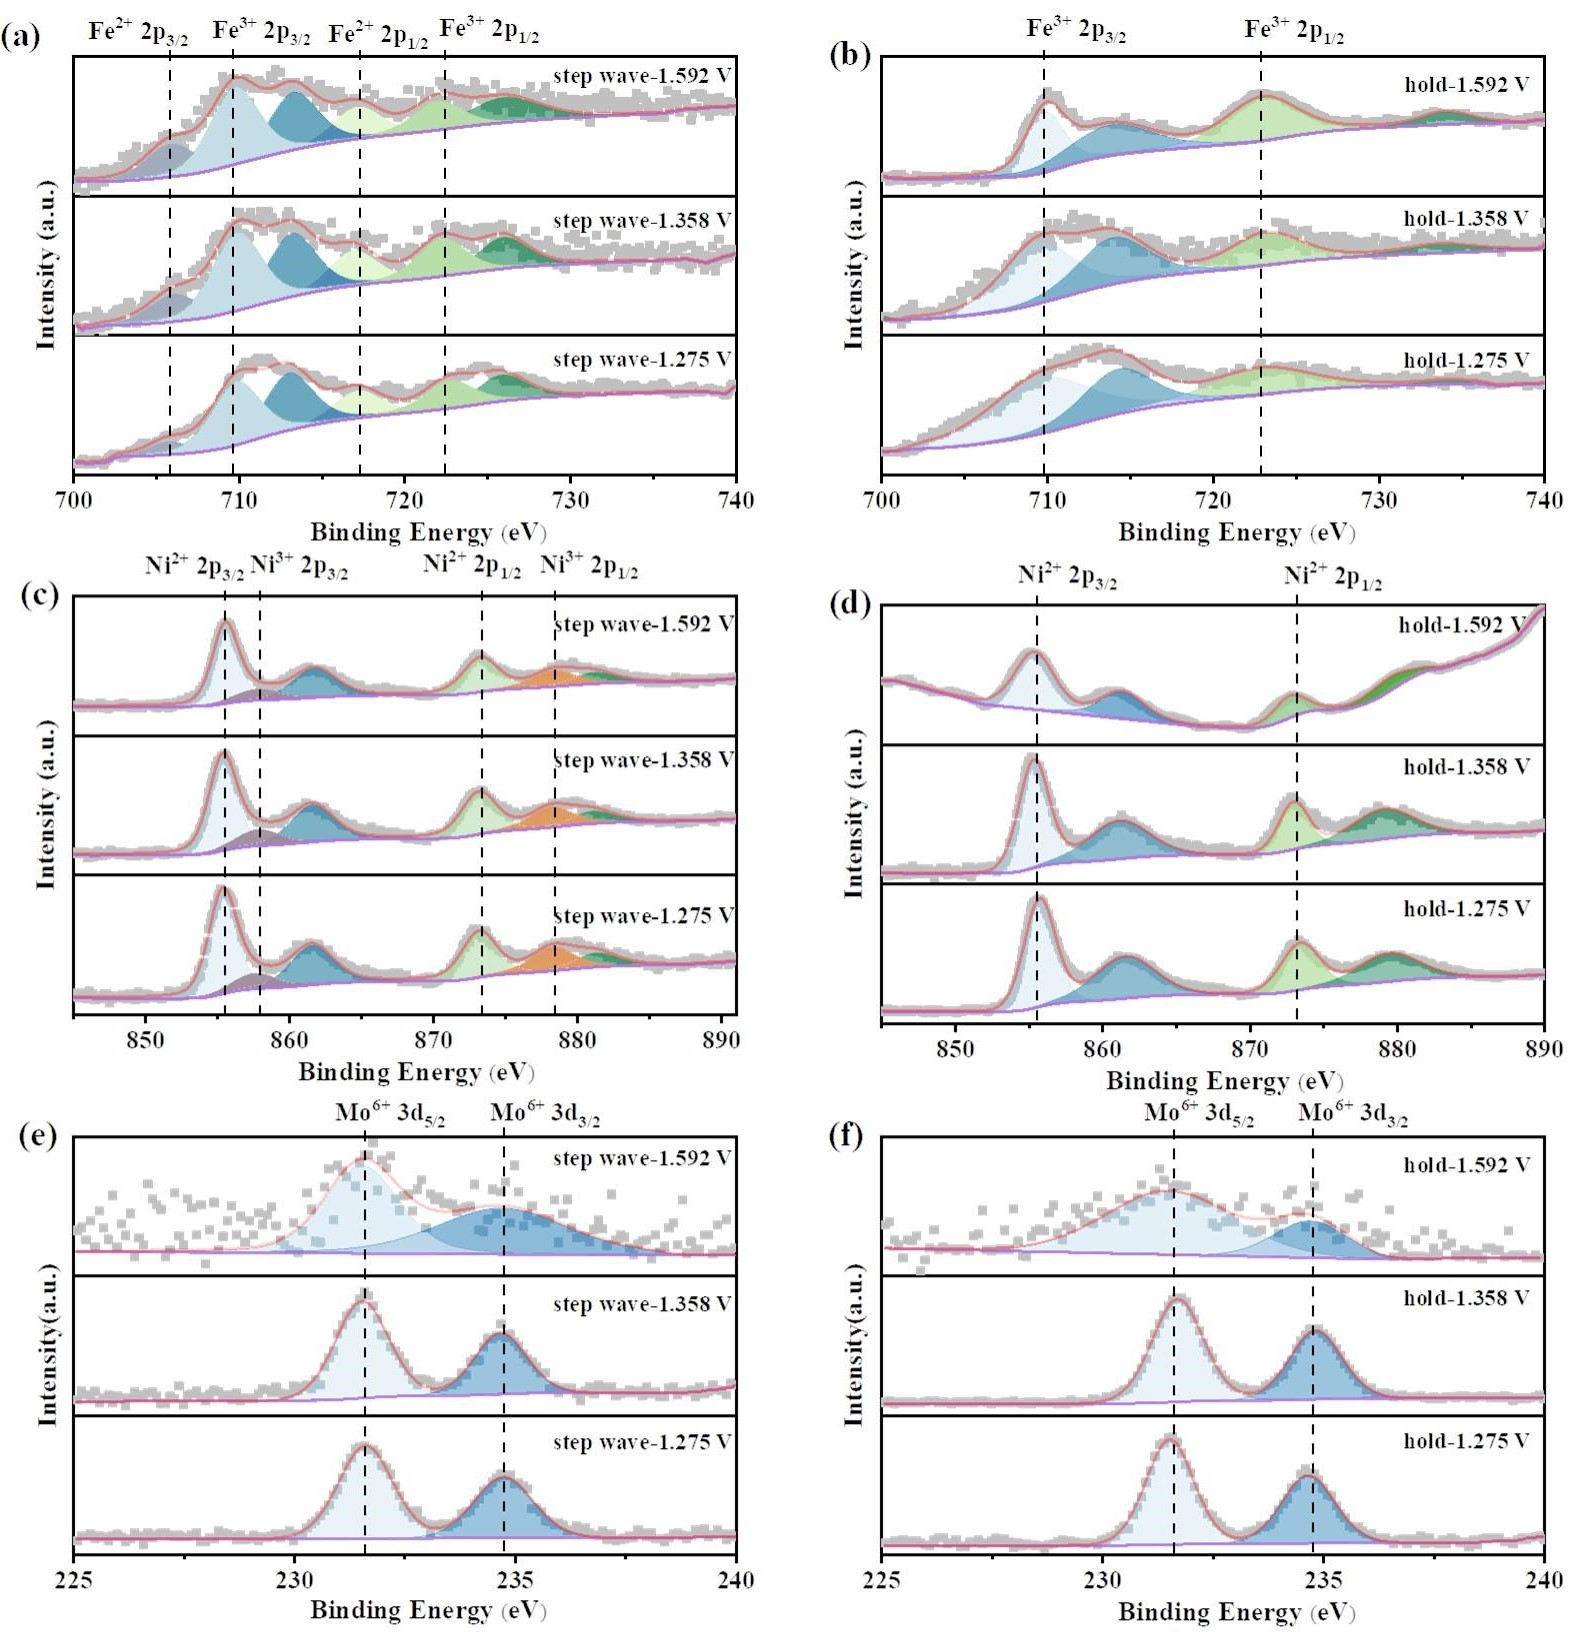

Supplement: s1 [file s1 › s15.jpg]

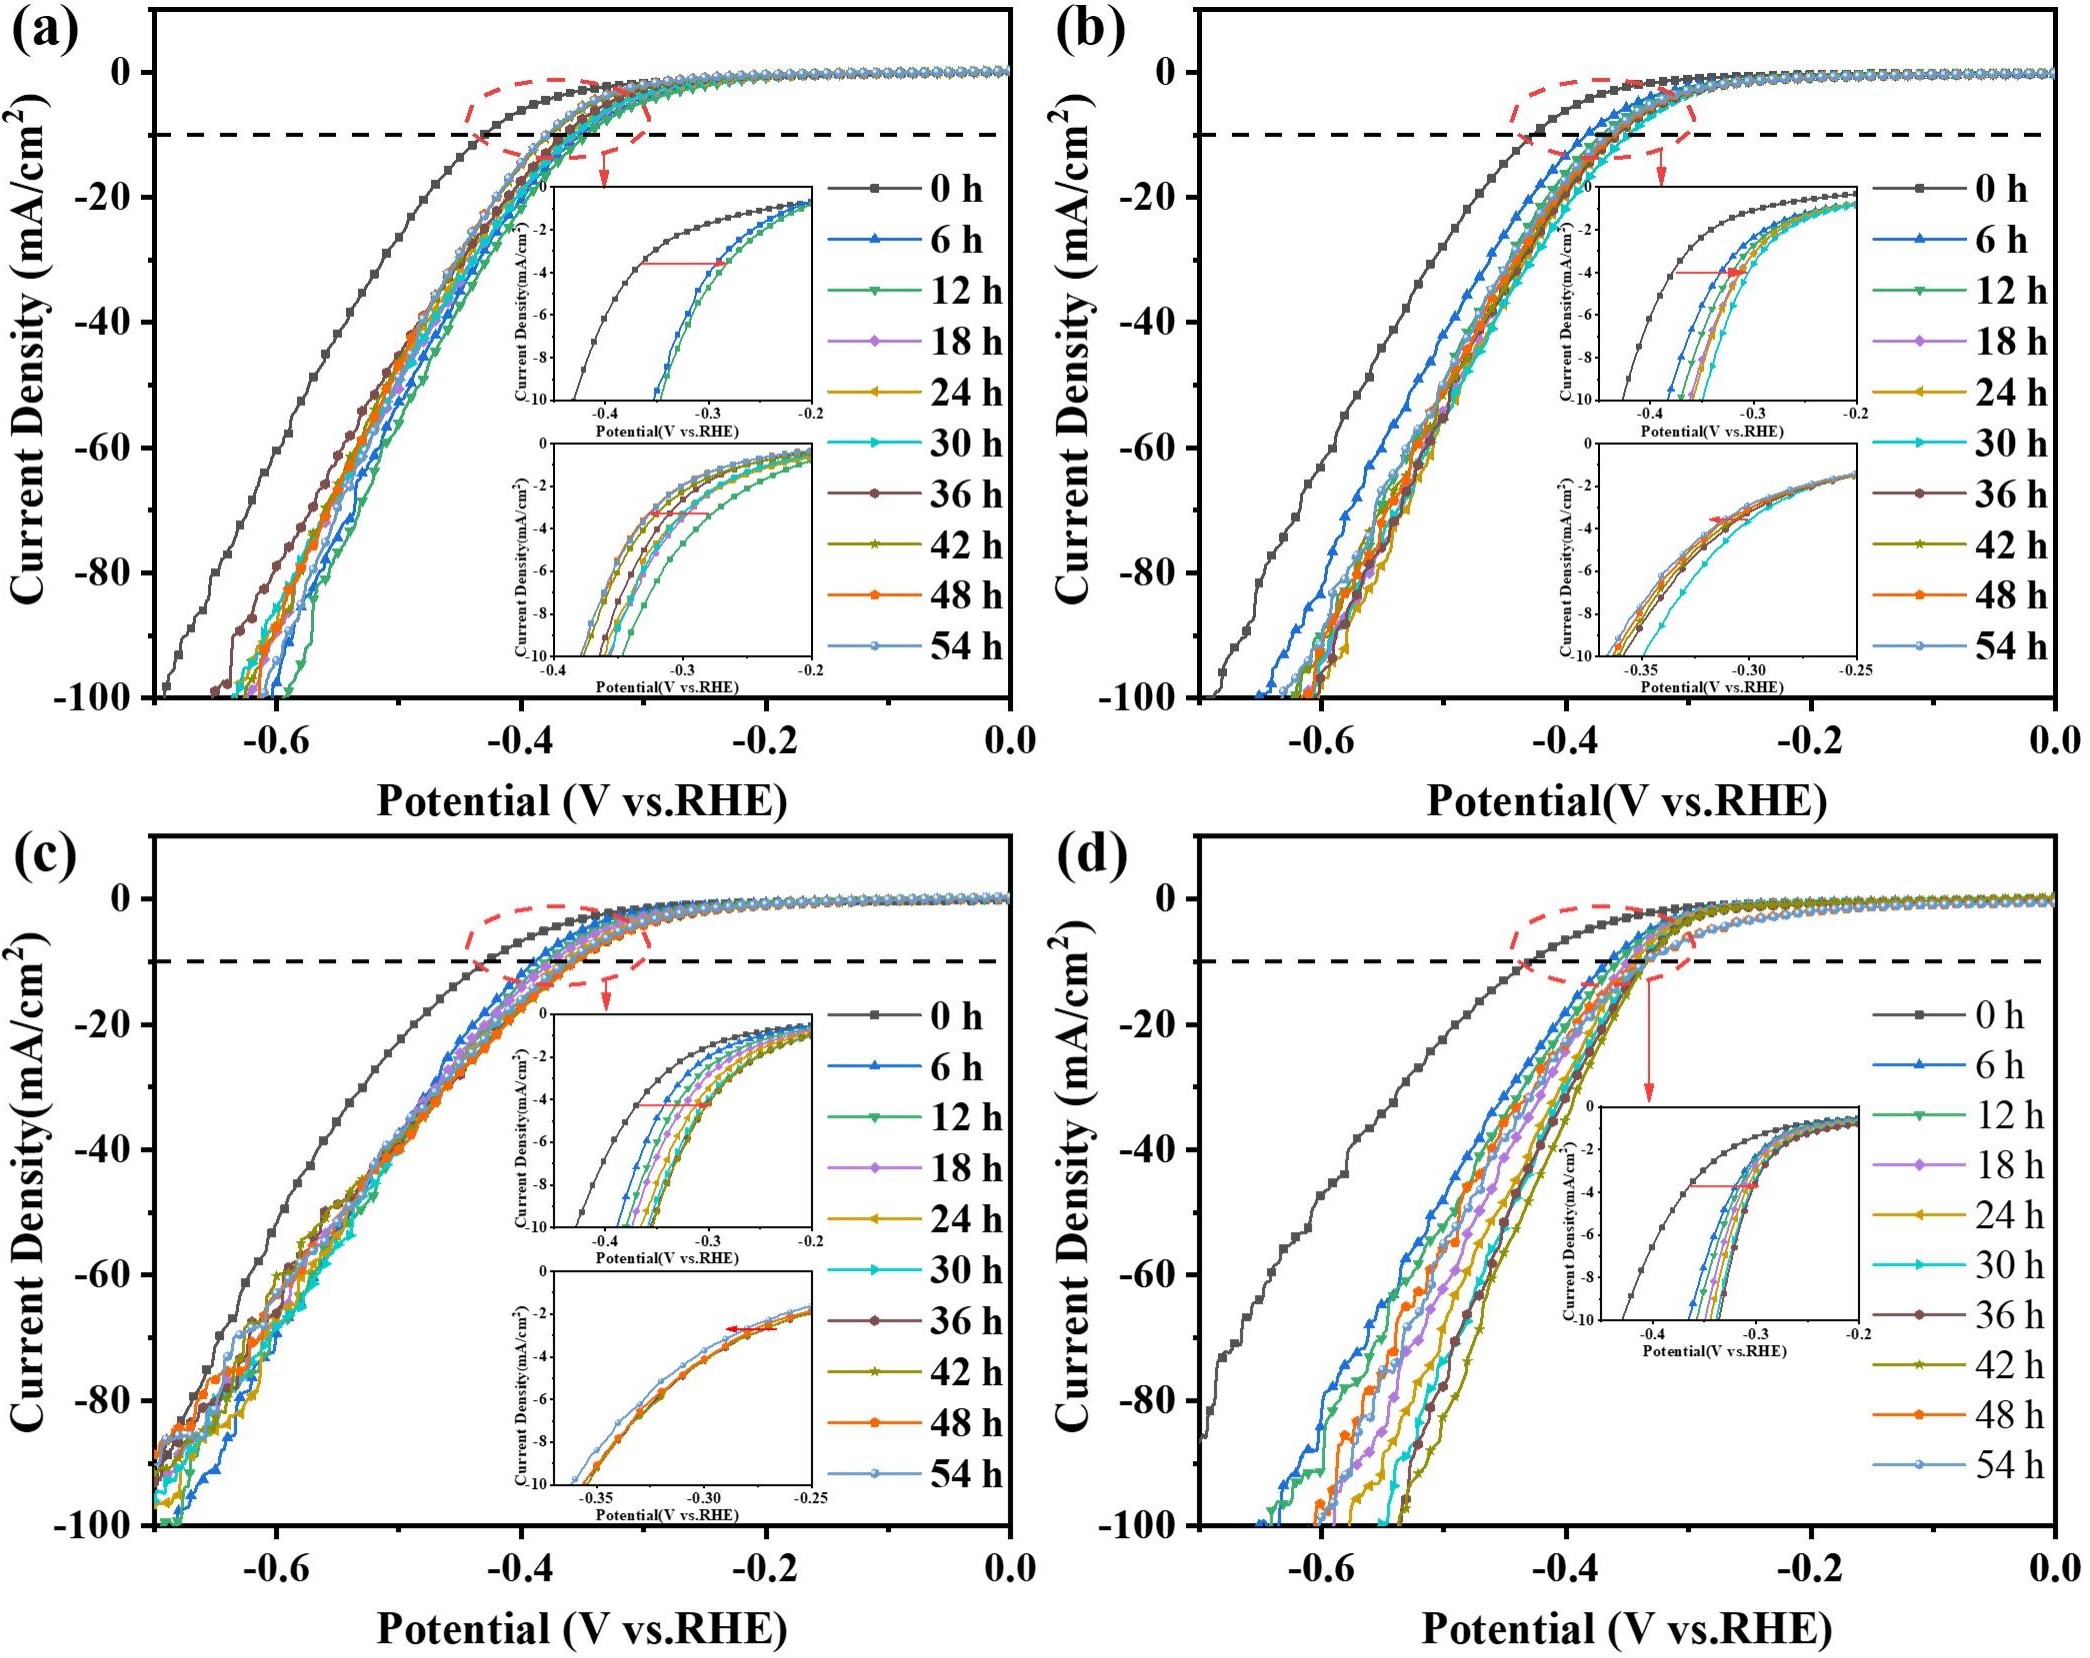

Supplement: s1 [file s1 › s2.jpg]

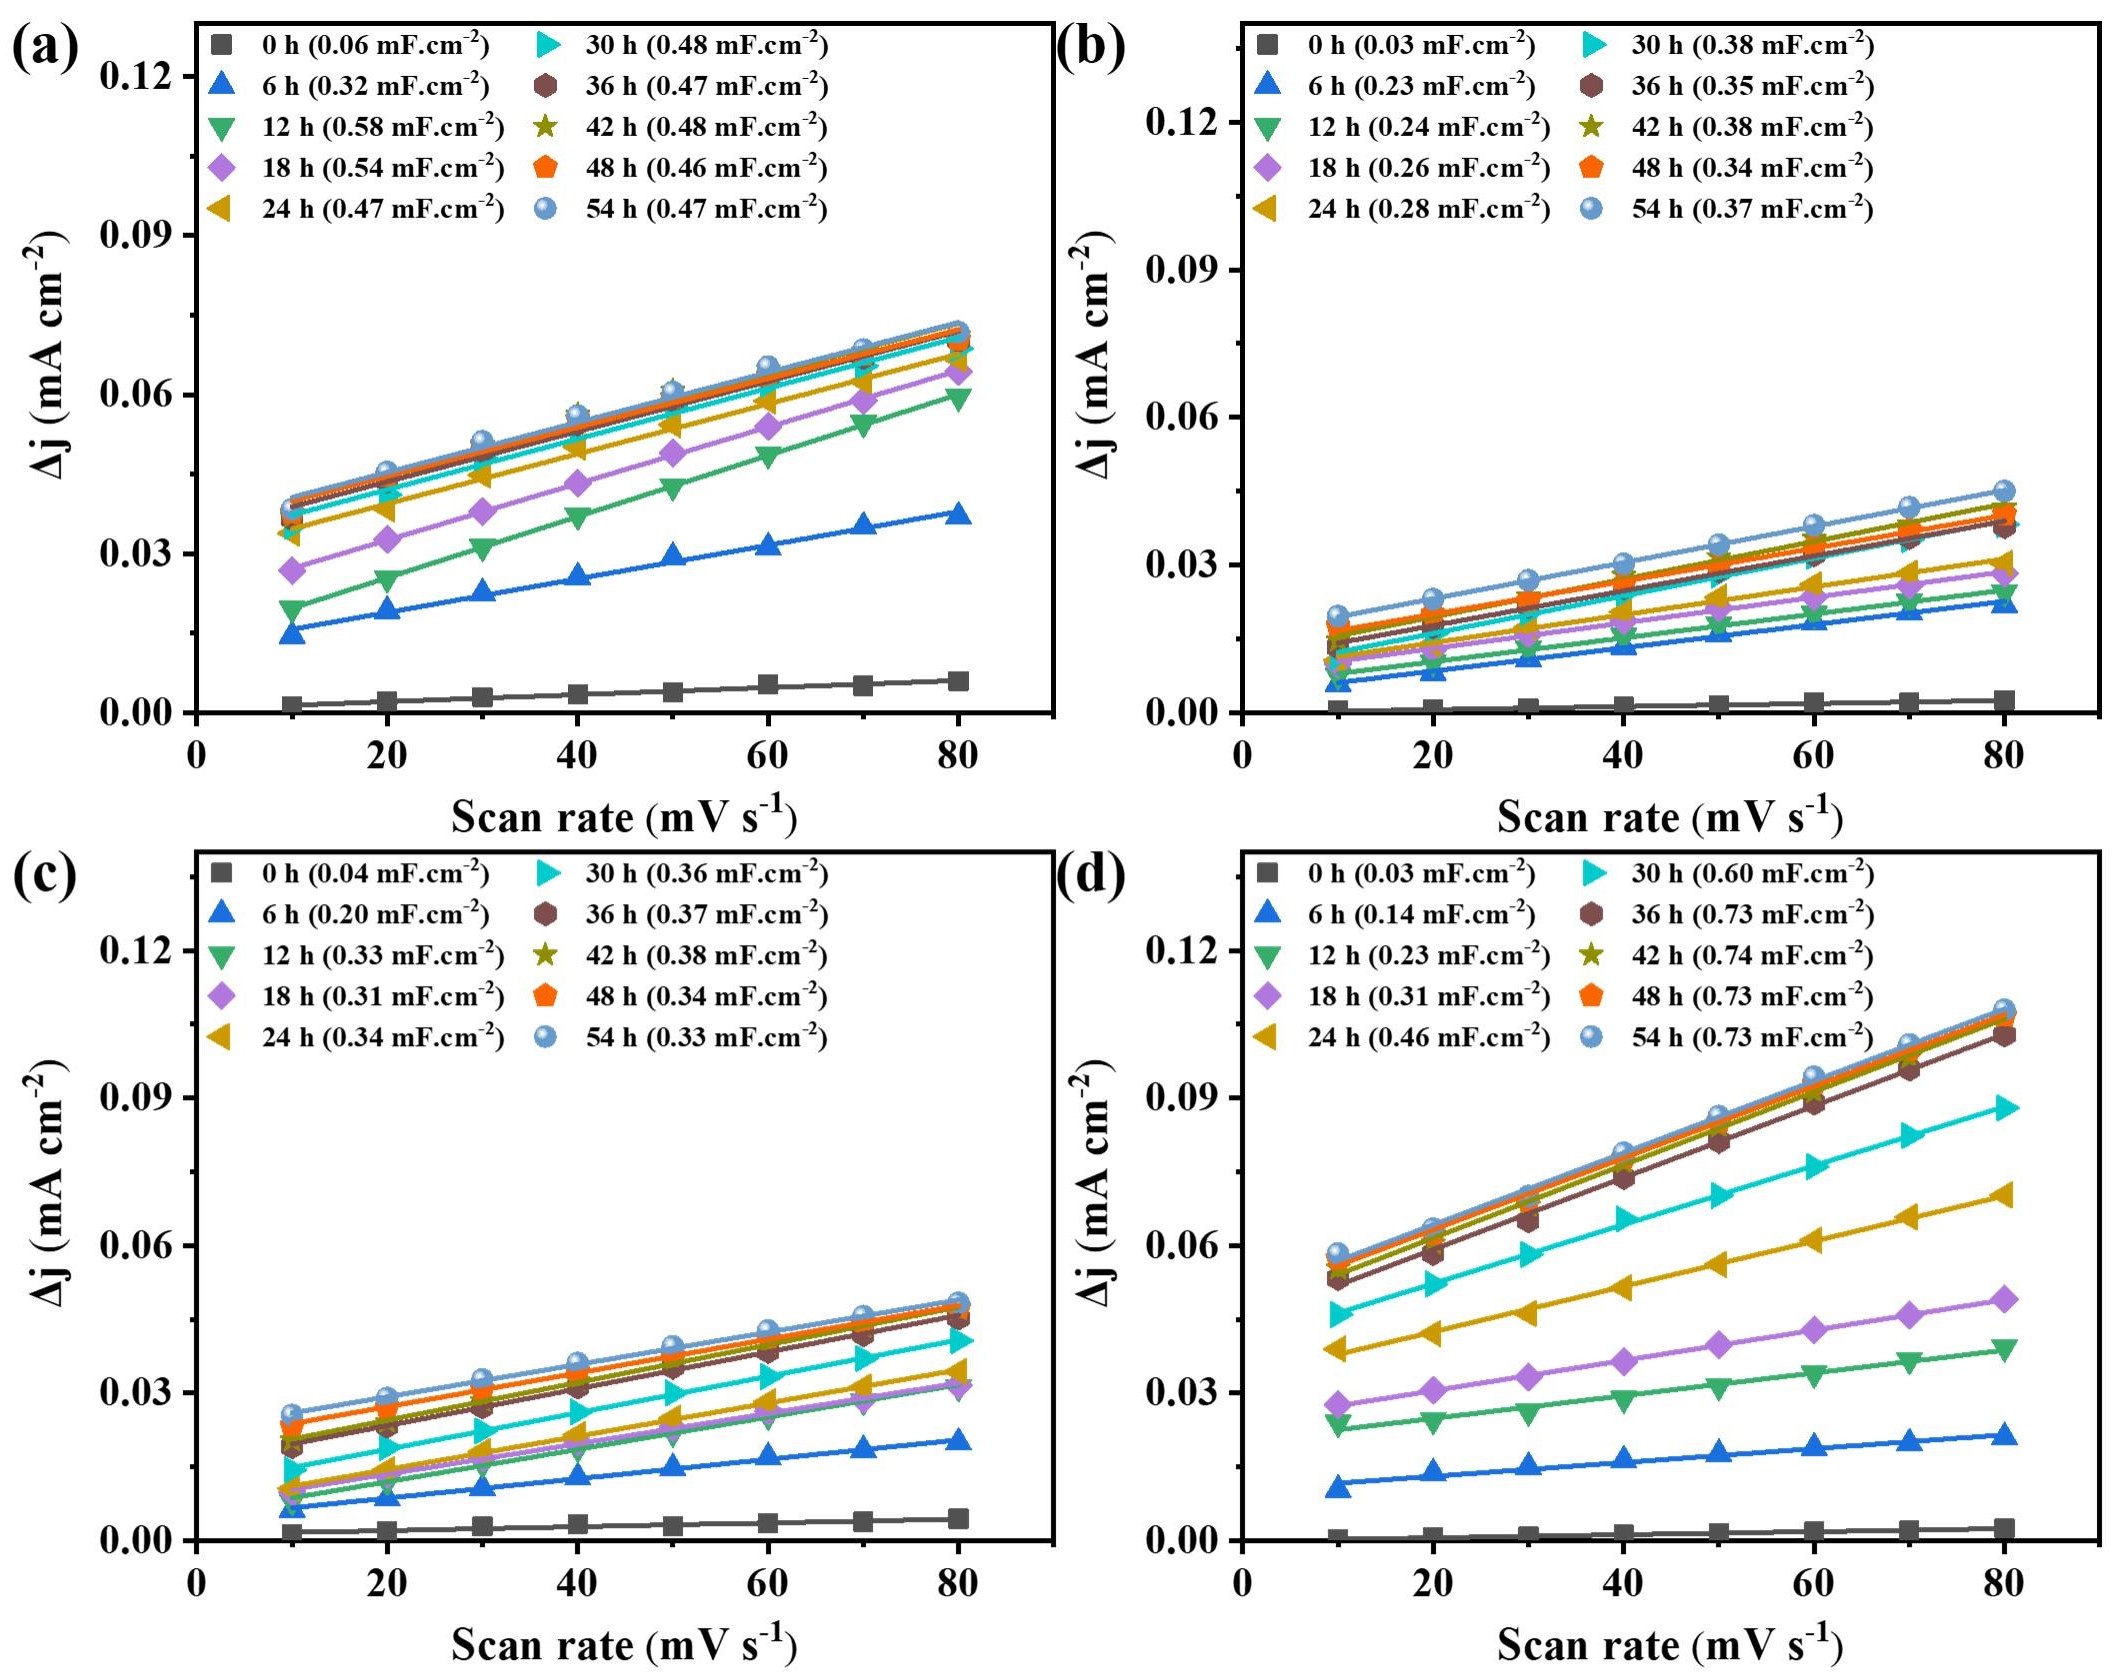

Supplement: s1 [file s1 › s3.jpg]

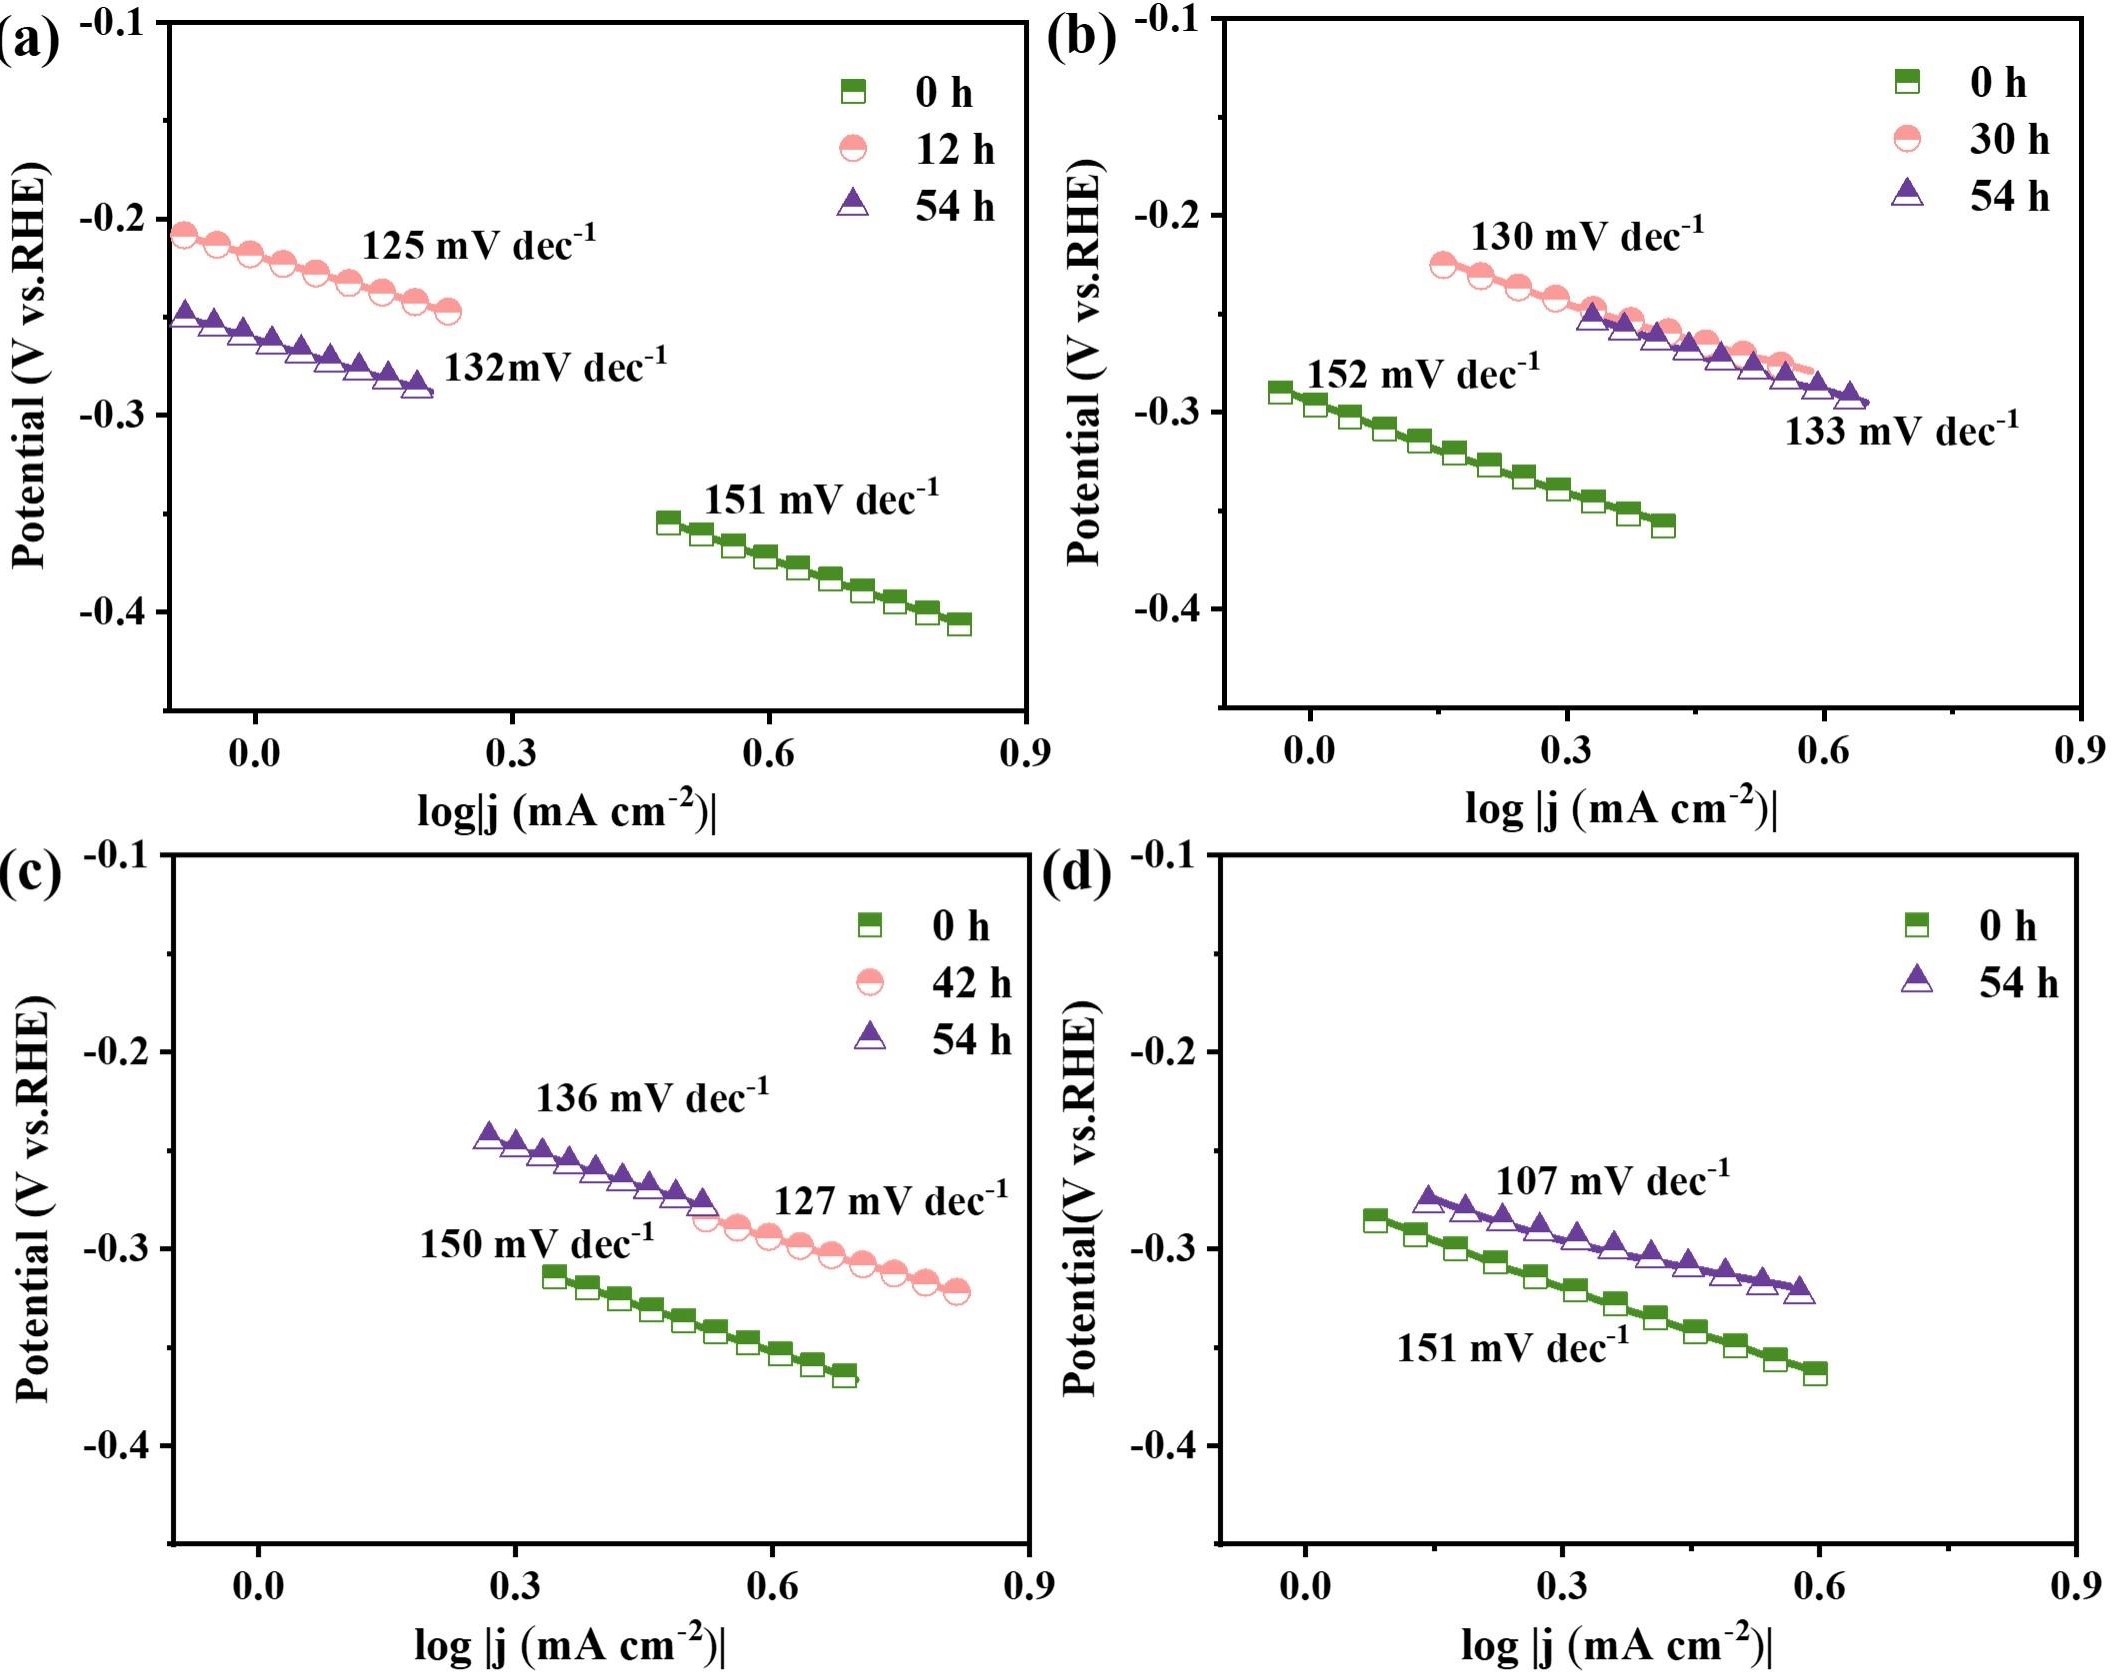

Supplement: s1 [file s1 › s4.jpg]

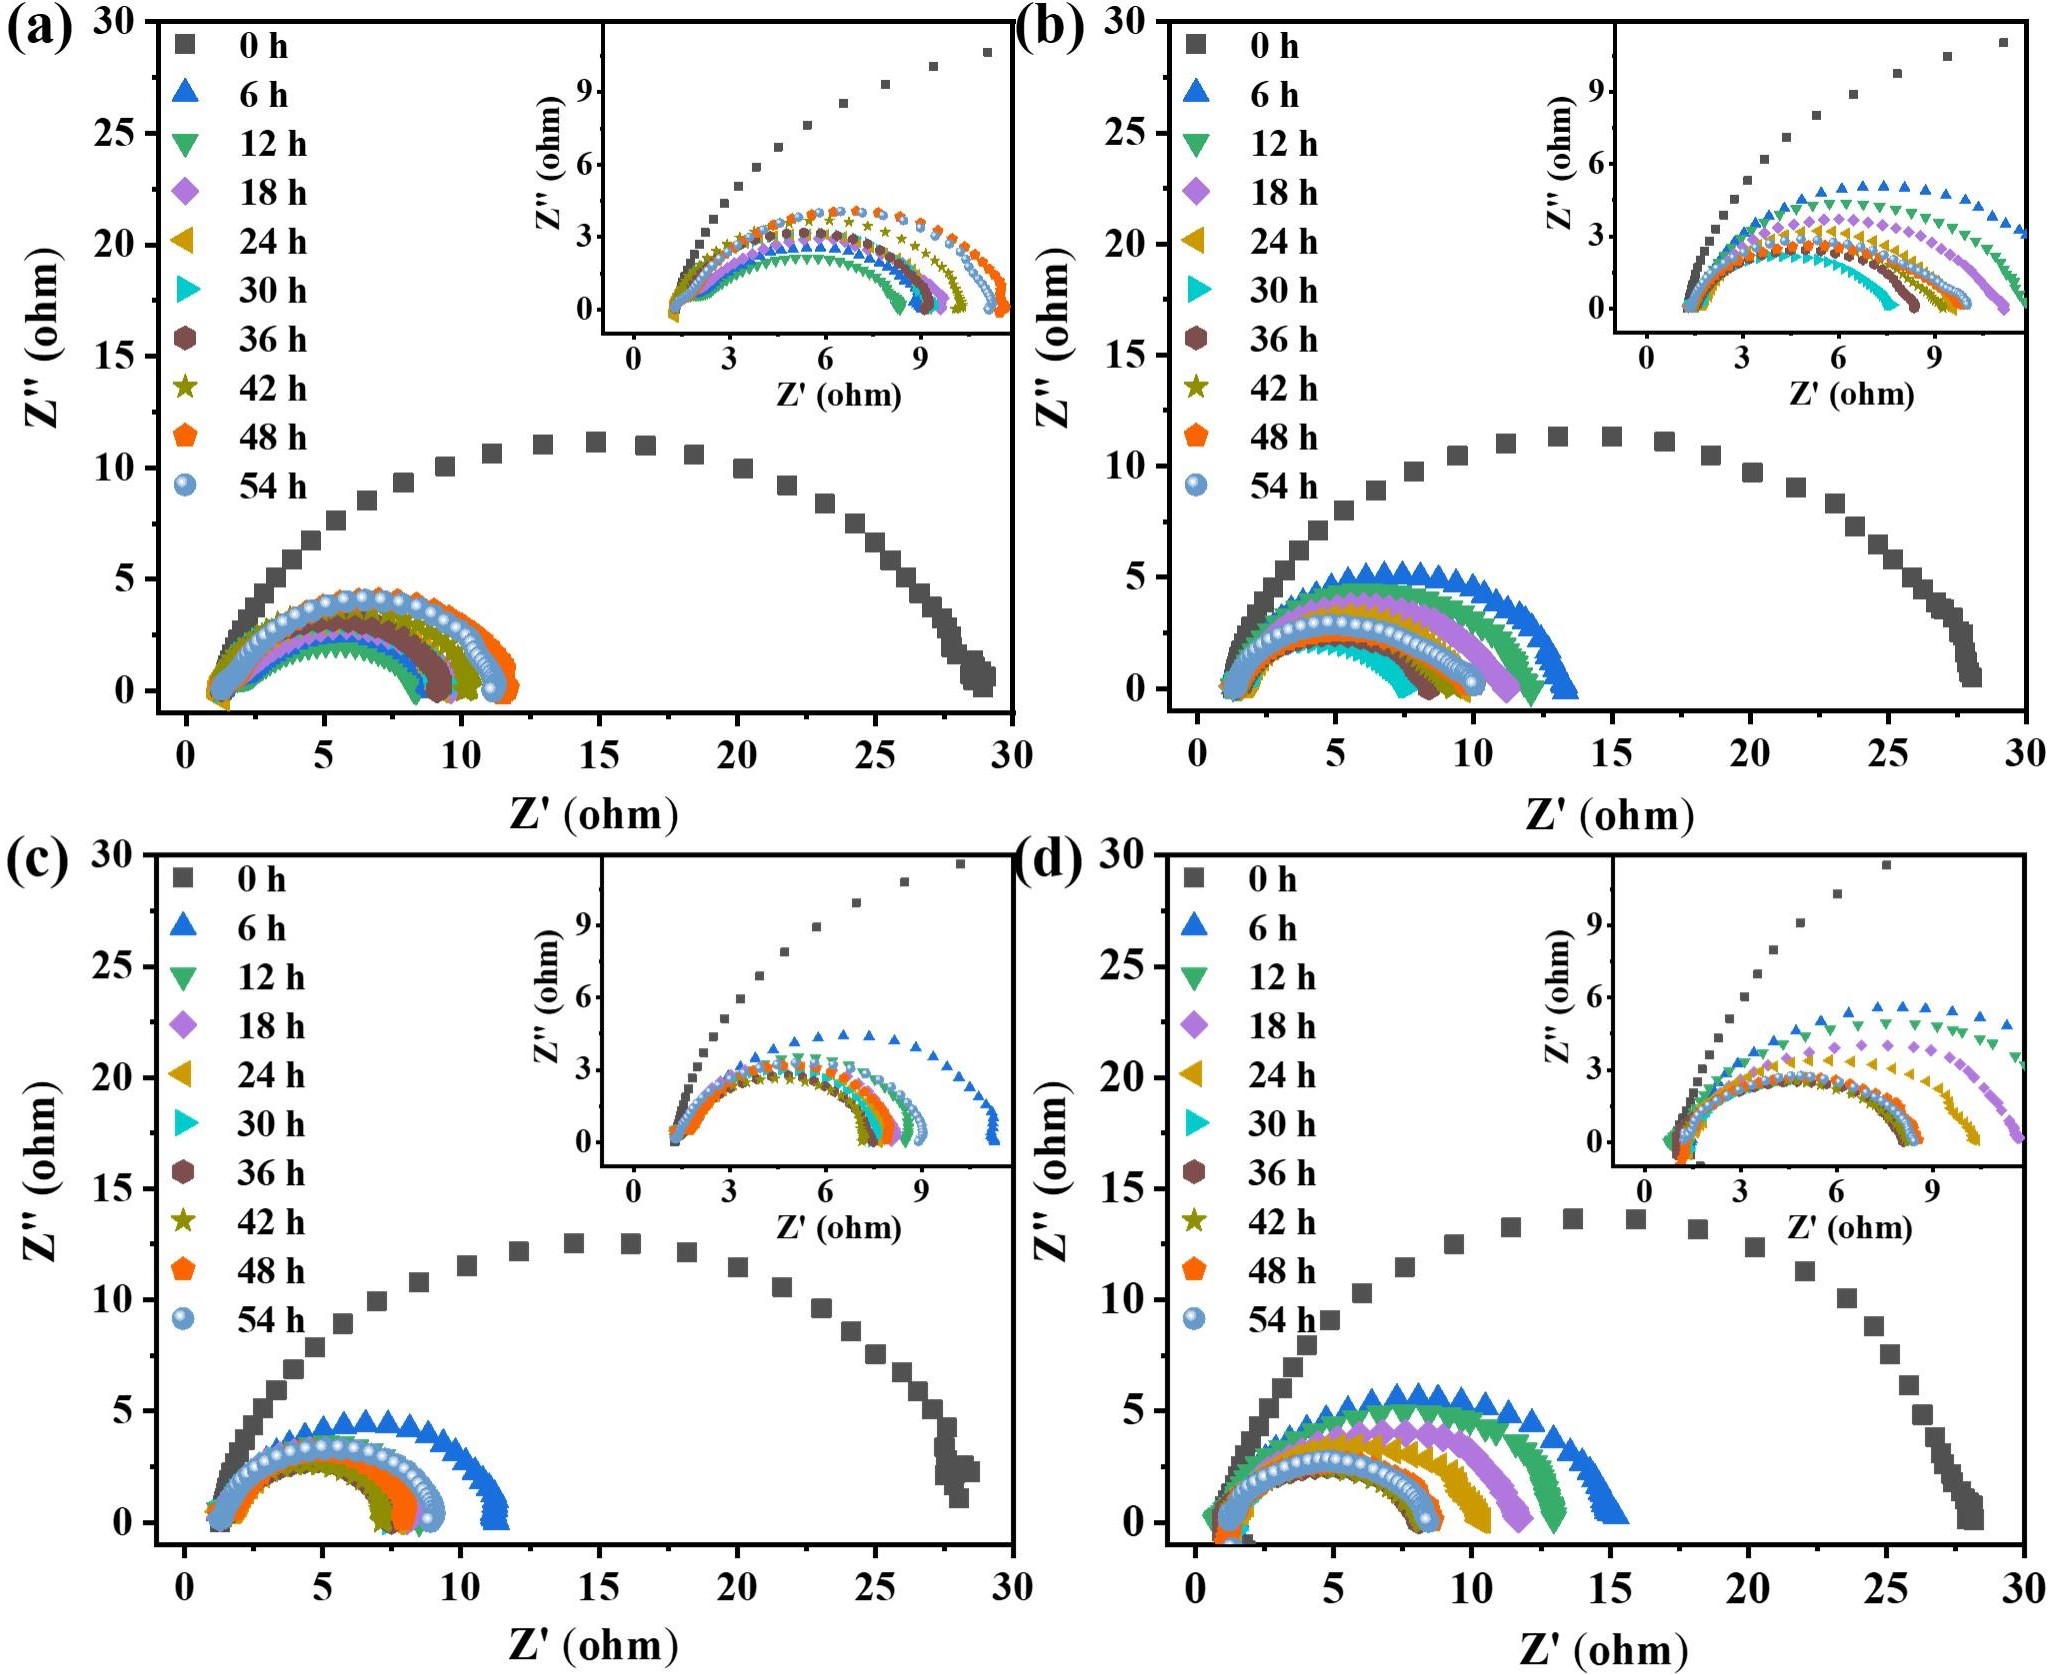

Supplement: s1 [file s1 › s5-1.jpg]

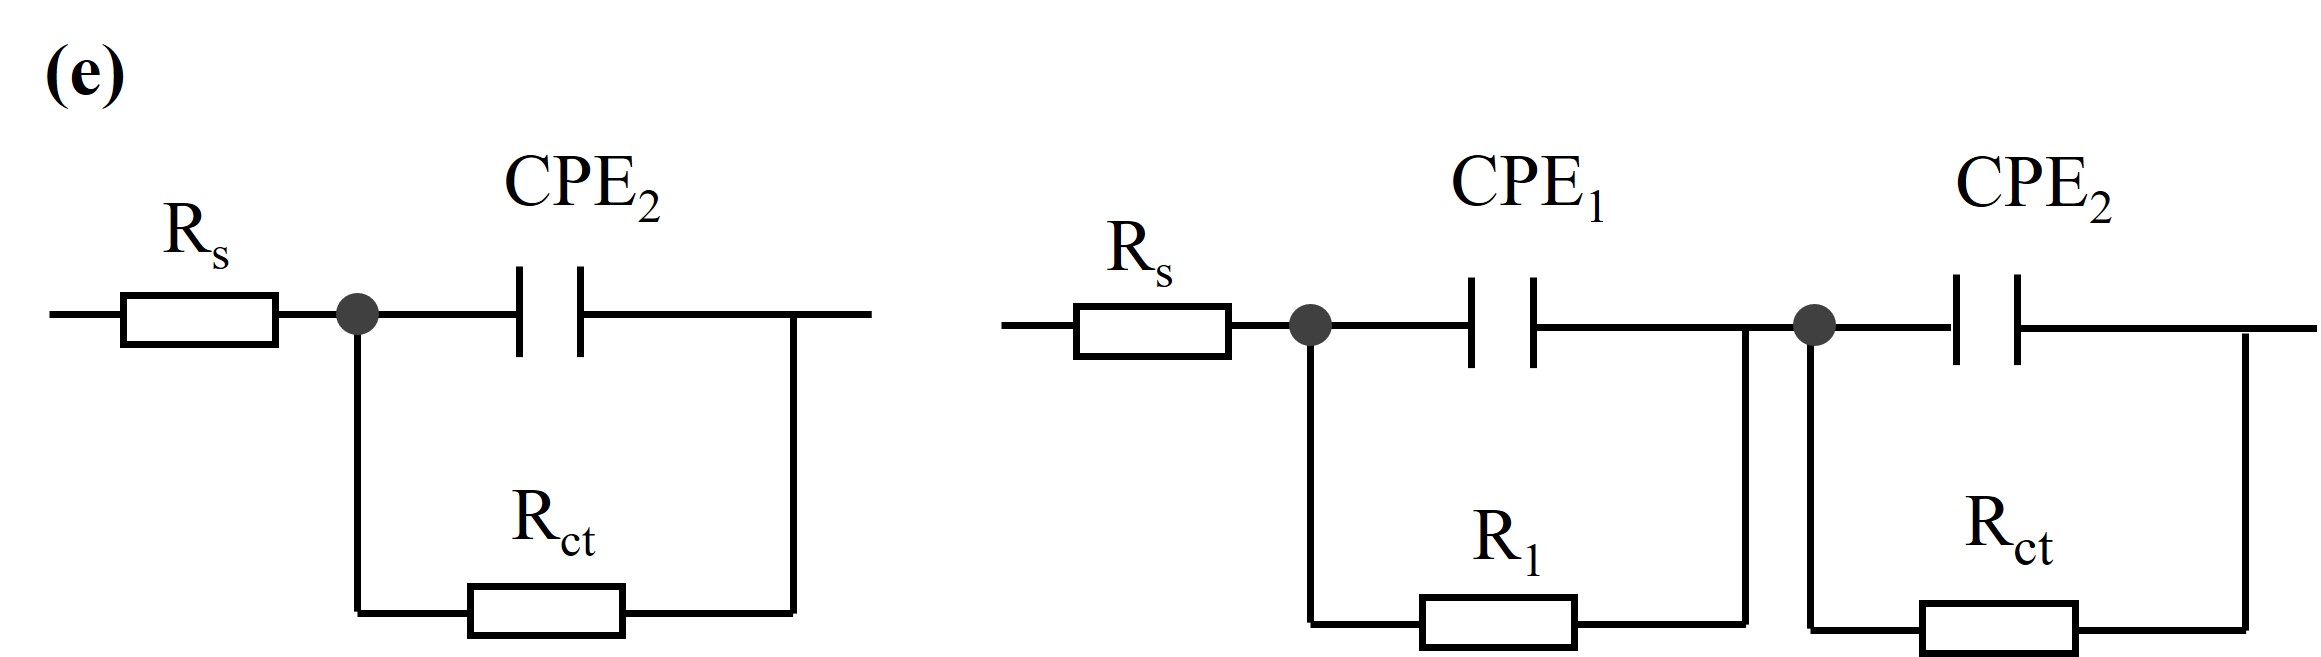

Supplement: s1 [file s1 › s5-2.jpg]

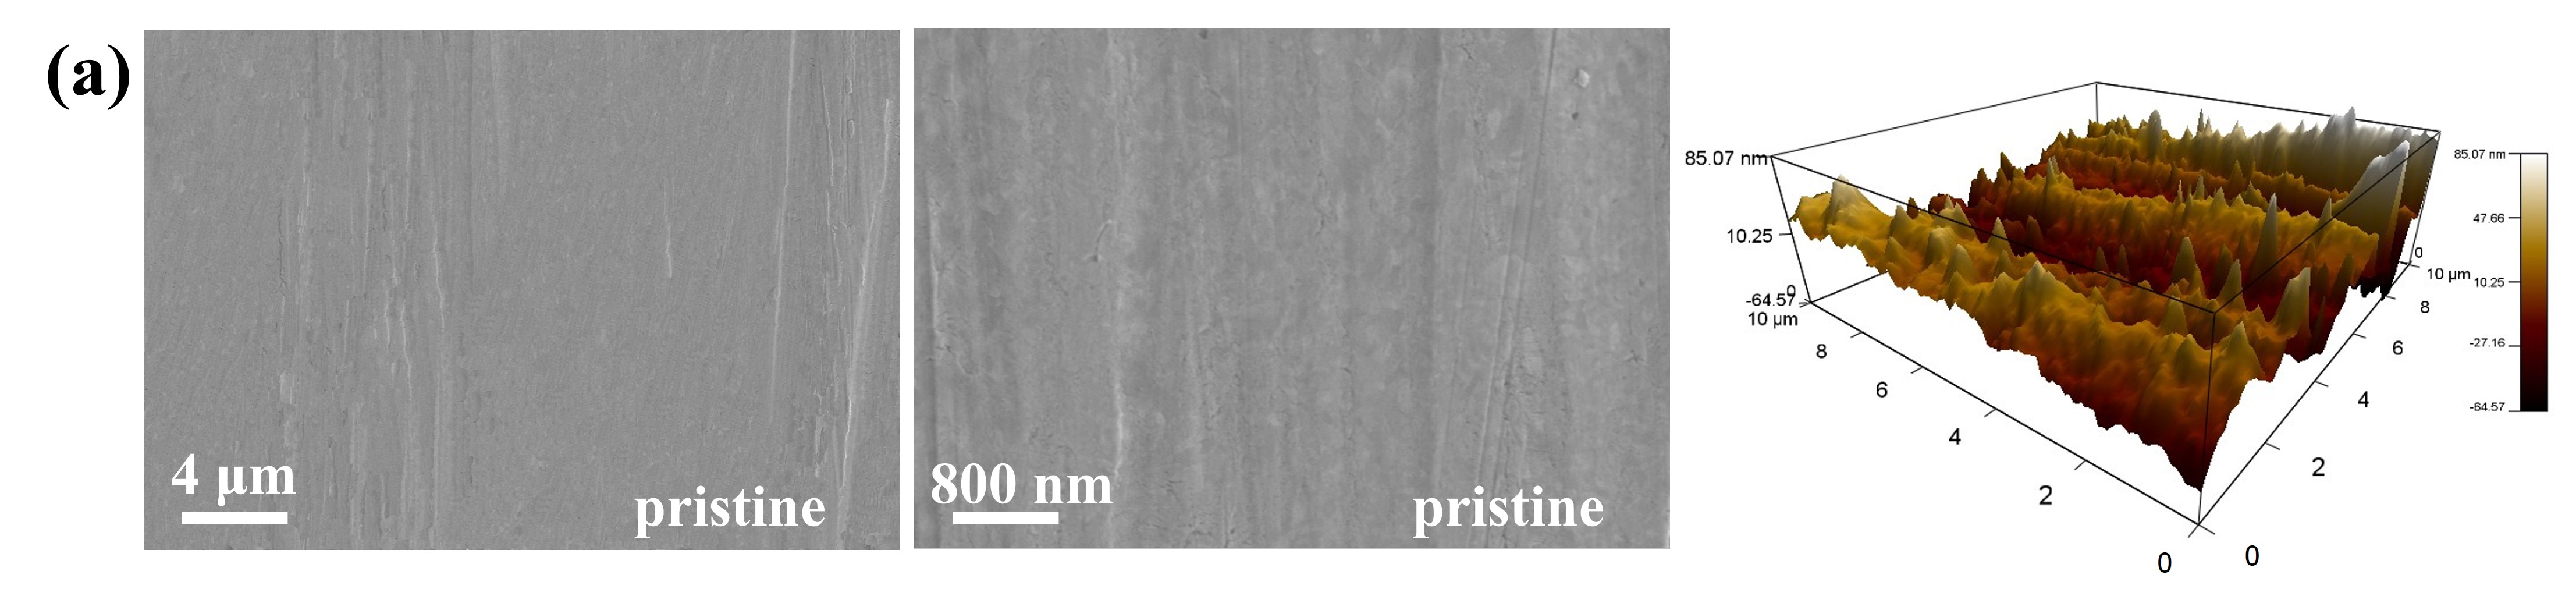

Supplement: s1 [file s1 › s6-1.jpg]

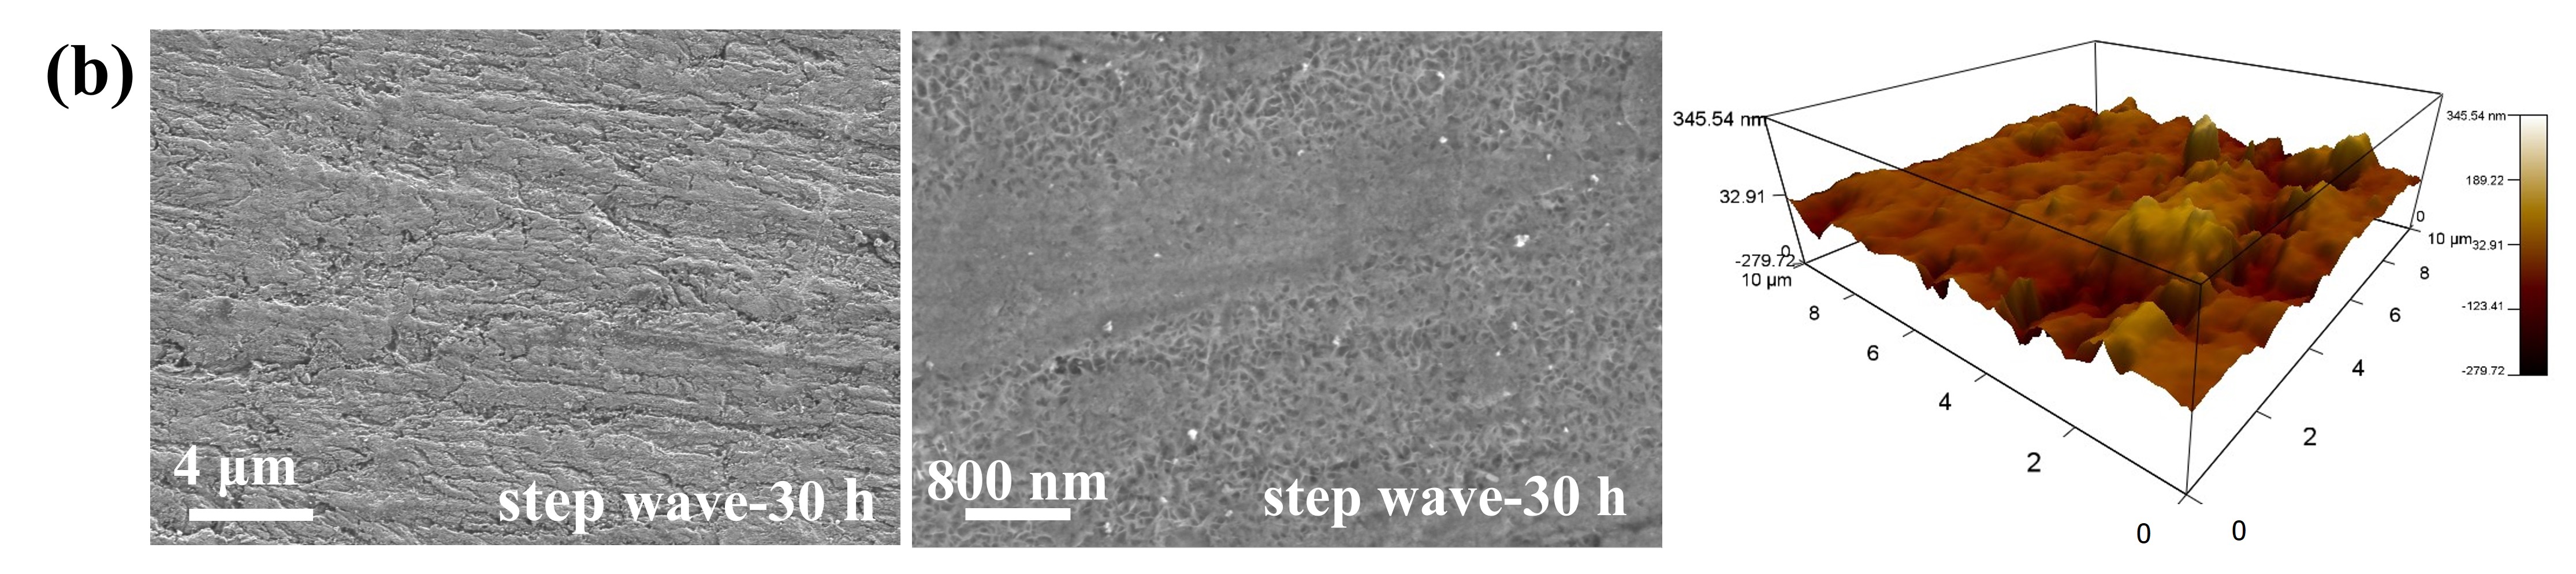

Supplement: s1 [file s1 › s6-2.jpg]

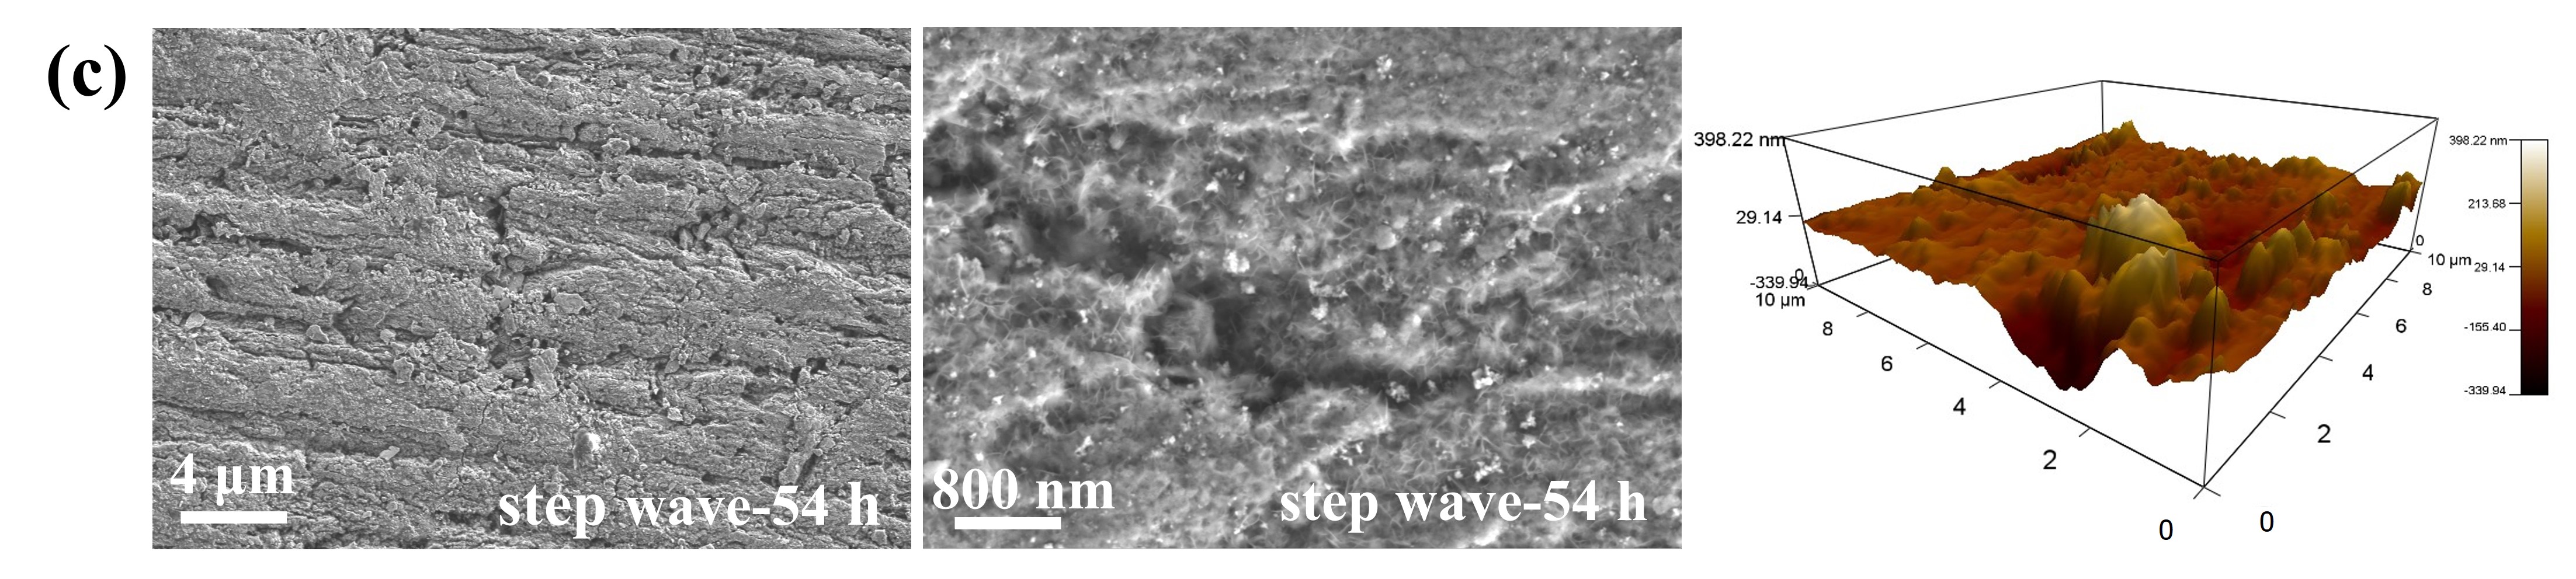

Supplement: s1 [file s1 › s6-3.jpg]

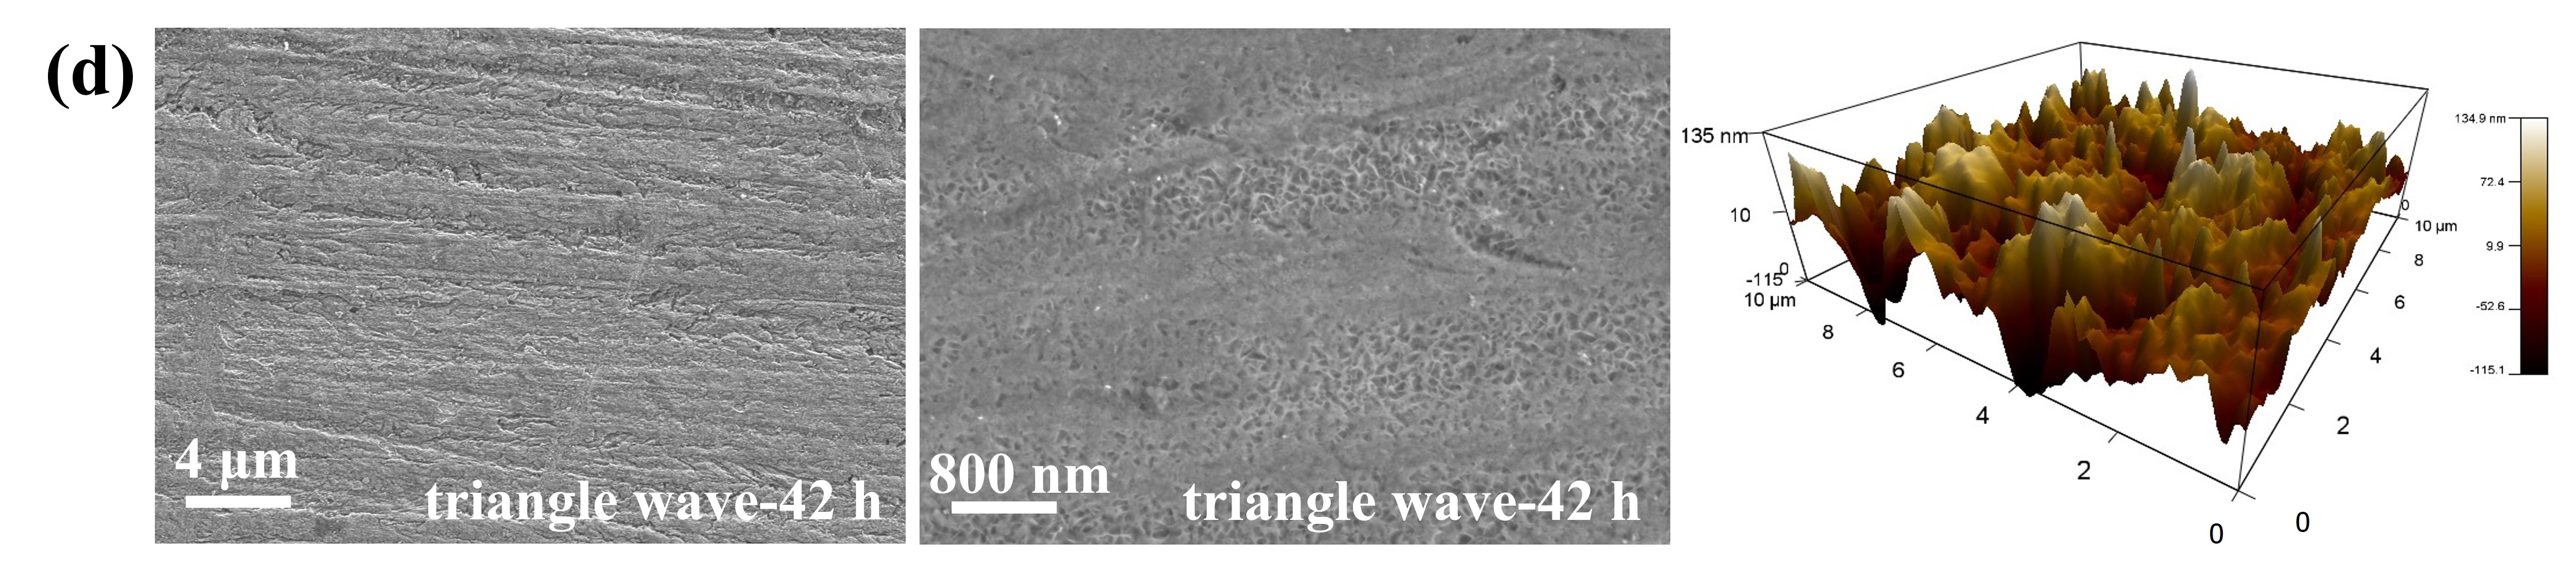

Supplement: s1 [file s1 › s6-4.jpg]

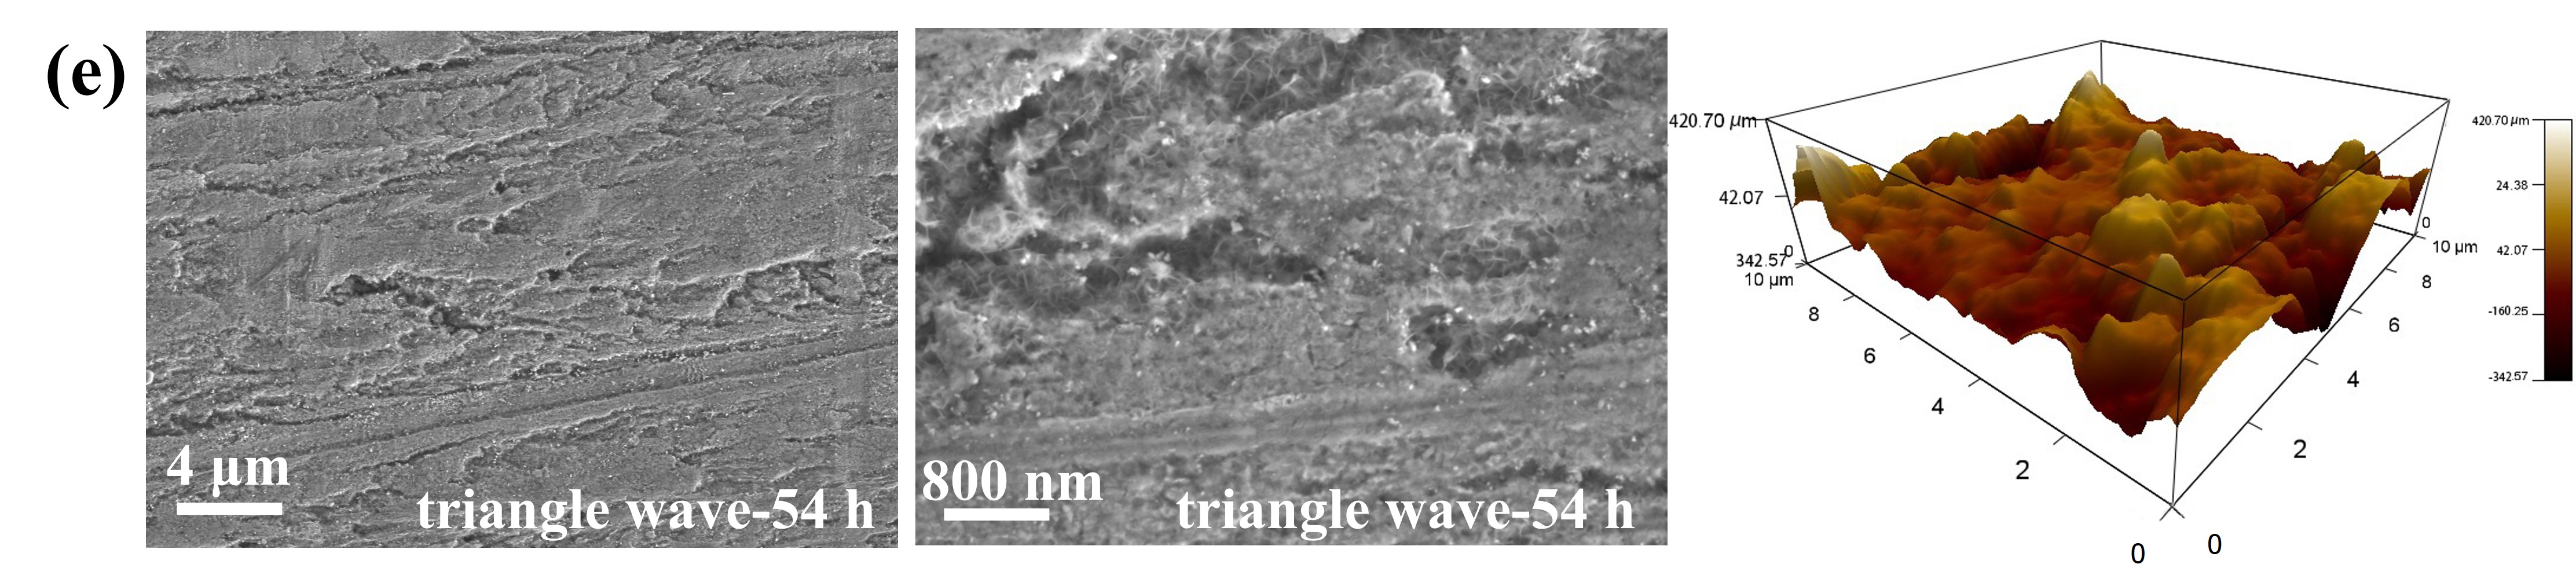

Supplement: s1 [file s1 › s6-5.jpg]

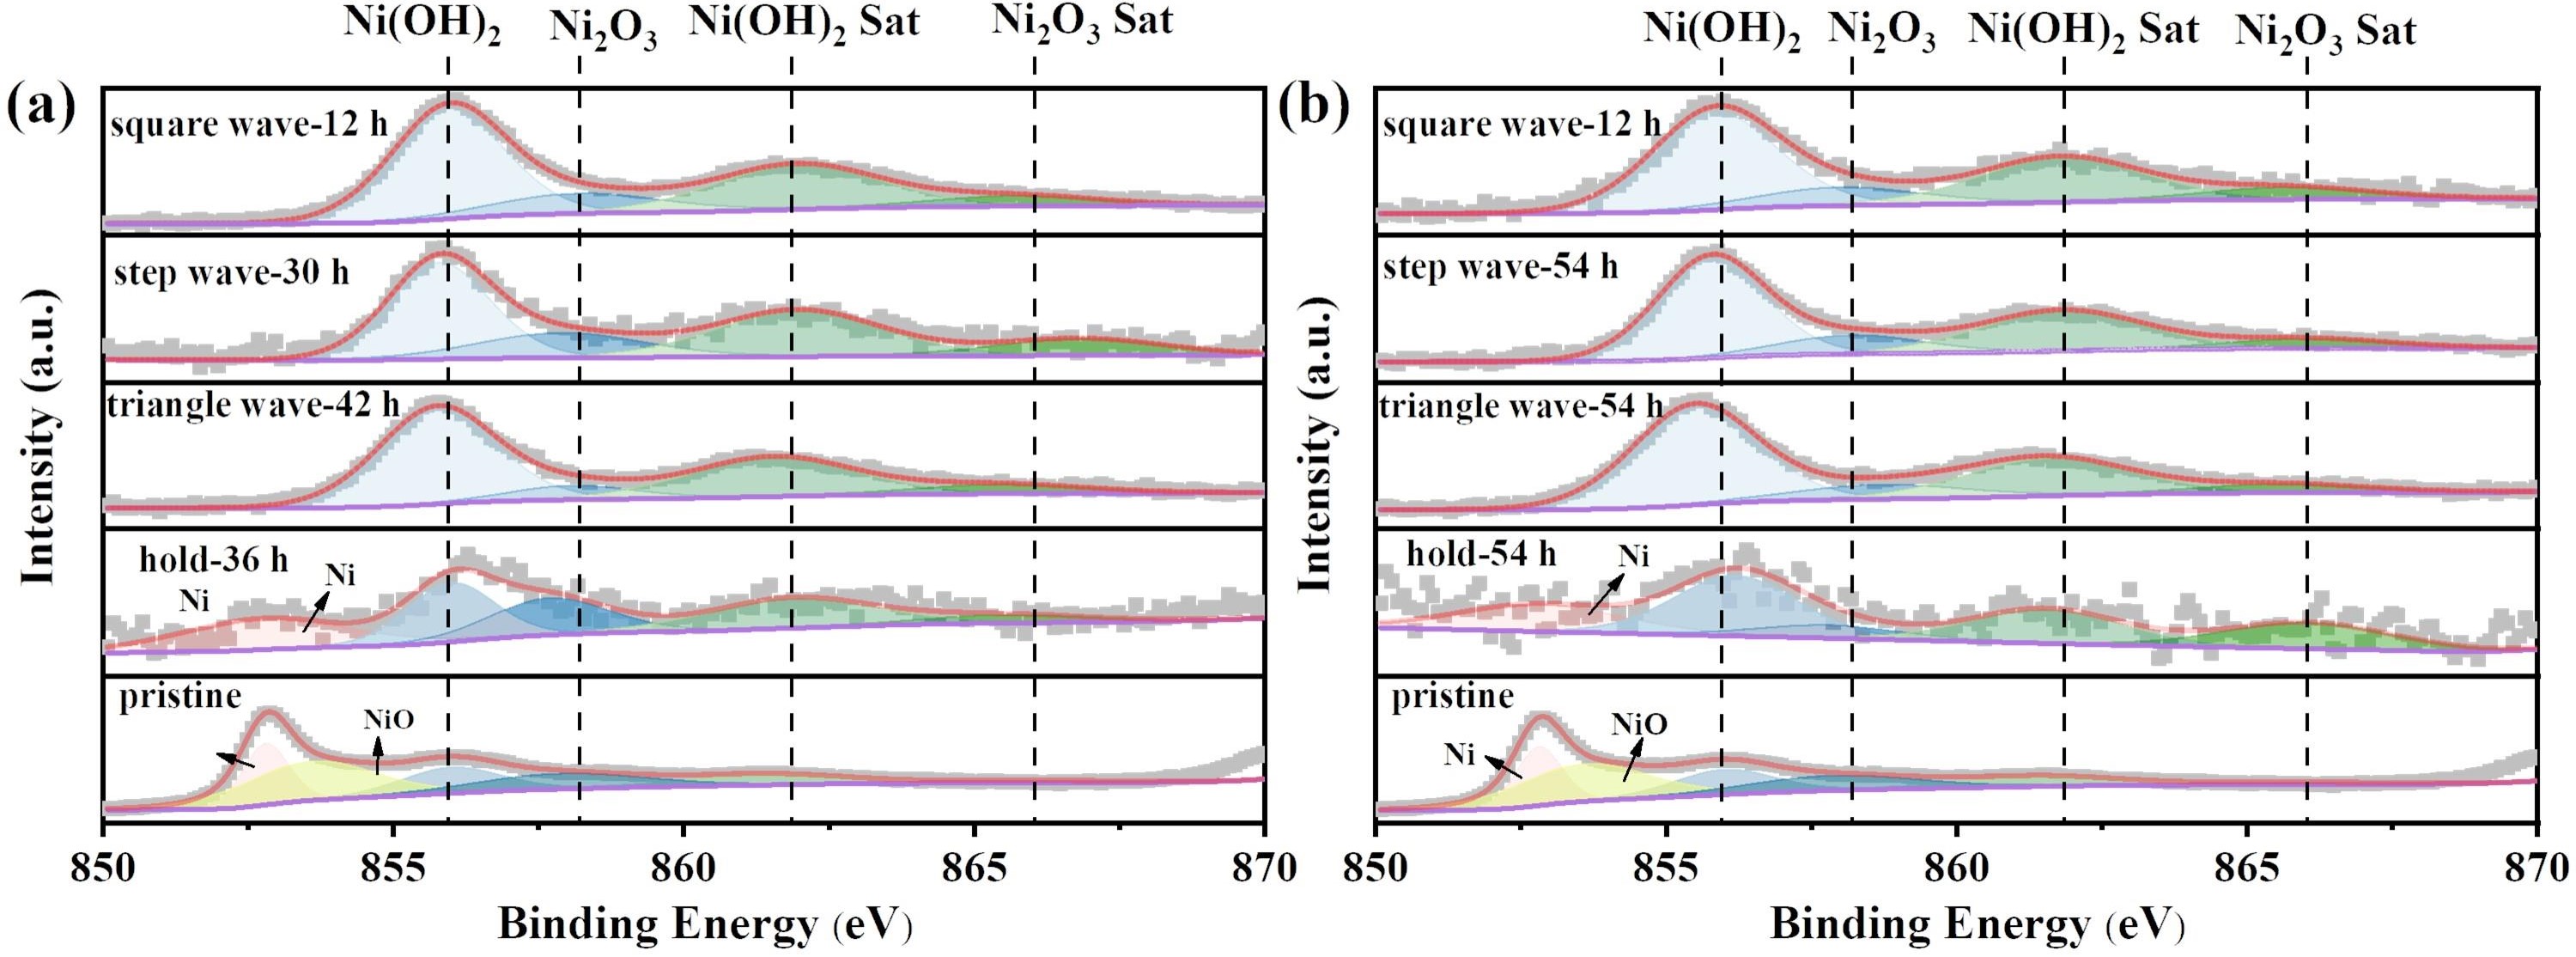

Supplement: s1 [file s1 › s7.jpg]

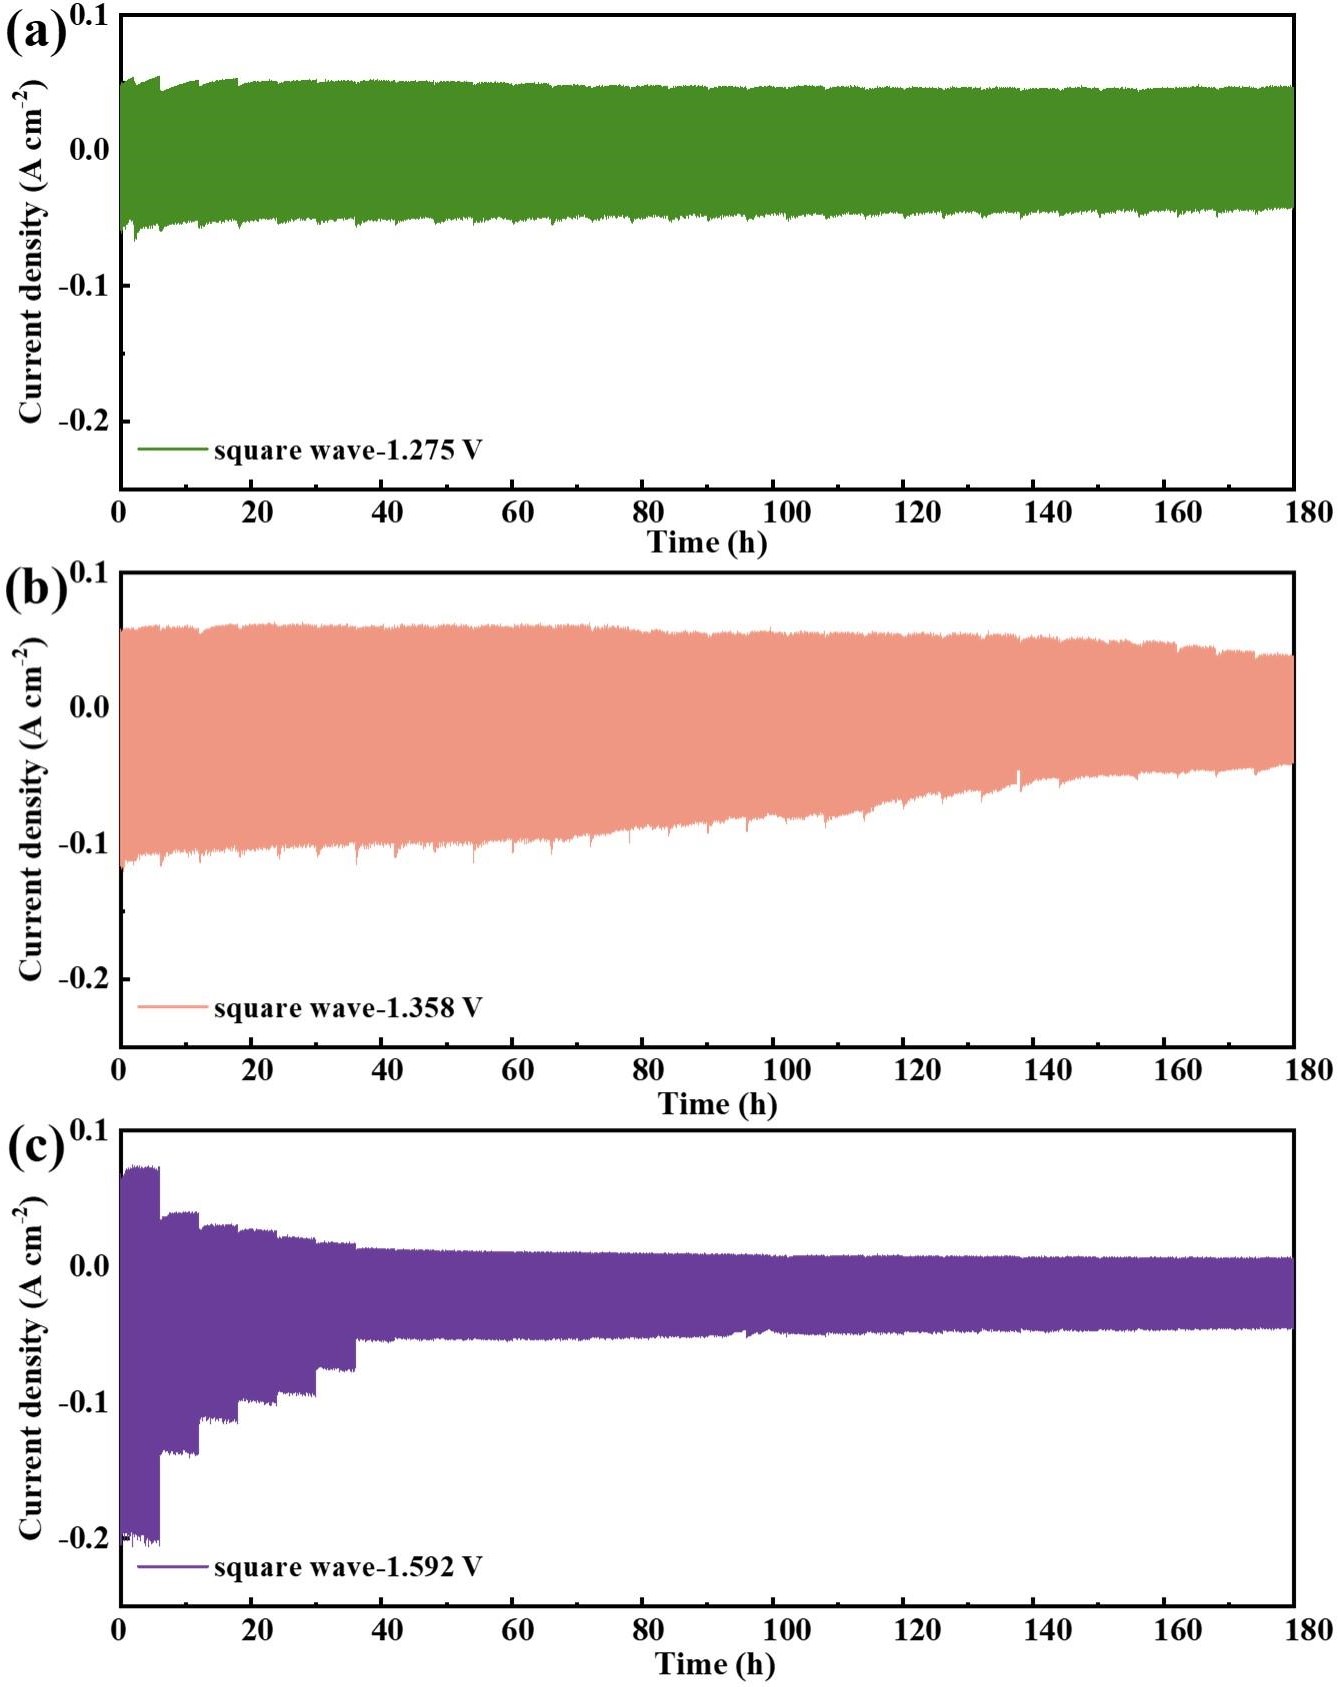

Supplement: s1 [file s1 › s8.jpg]

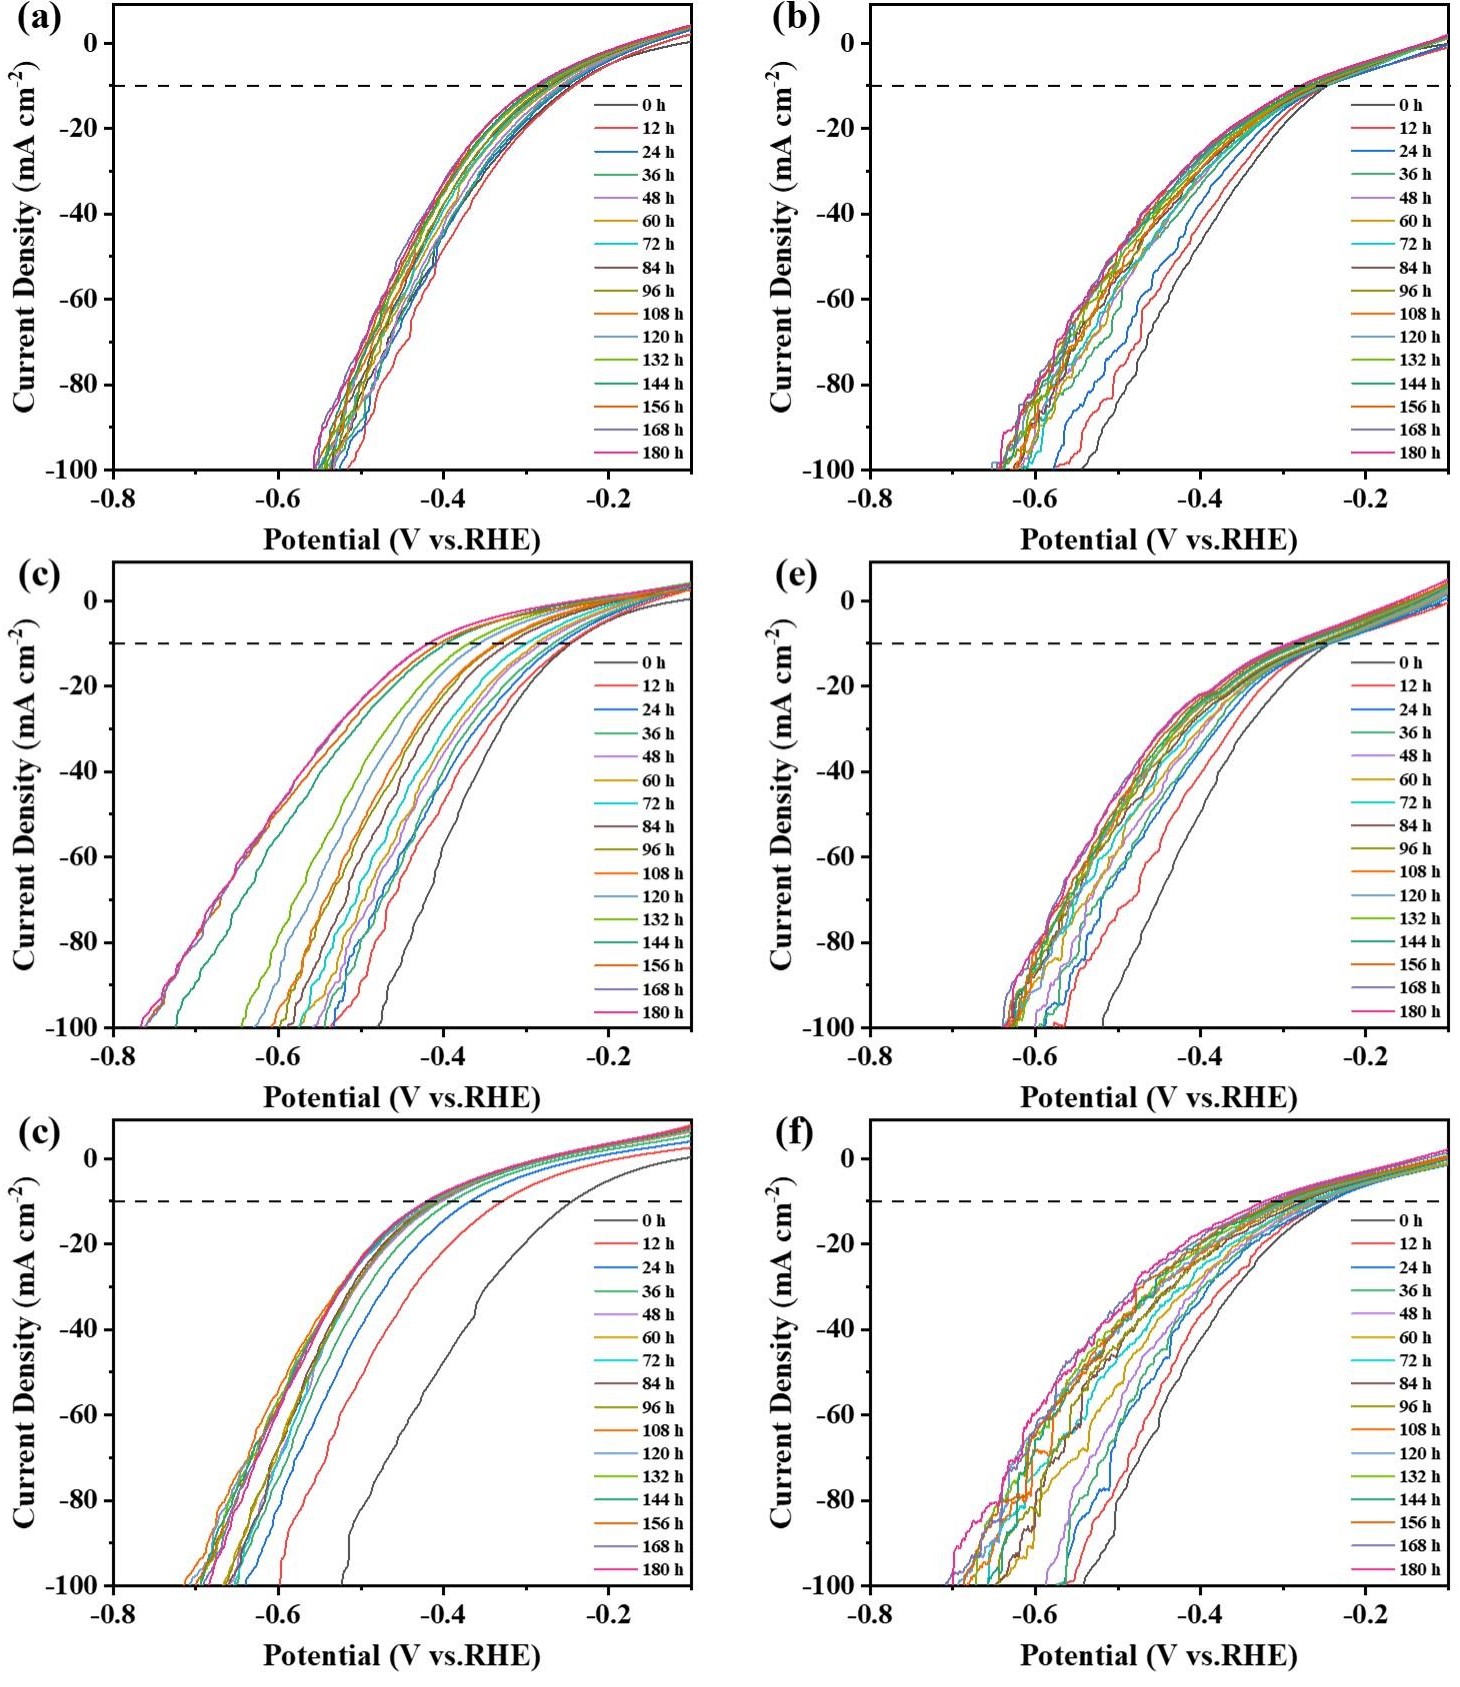

Supplement: s1 [file s1 › s9.jpg]
